# Supplementary material for: Global, regional, and national lifetime risks of developing benign prostatic hyperplasia in men aged over 40: a population-based cross-sectional study from 1990 to 2021
Source: Research Square preprint supplement (doi:10.21203/rs.3.rs-6617584/v1), 2025-05-16
Supplement: Supplementary file 2 [file a0c727bf7e6aec32f7e8bc06.xlsx]

## Sheet: Supplementary Table 1
Supplementary Table 1. Lifetime risks of developing BPH in 2021 by countries in men.
location name	40 years to death	50 years to death	60 years to death	70 years to death	80 years to death
Afghanistan	12.50(12.19-12.82)	11.71(11.40-12.02)	7.81(7.56-8.07)	2.27(2.19-2.36)	0.17(0.15-0.19)
Albania	33.99(32.44-35.54)	32.54(31.16-33.93)	25.81(24.85-26.78)	10.82(10.34-11.29)	1.51(1.37-1.65)
Algeria	23.75(23.37-24.13)	22.76(22.40-23.13)	17.35(17.07-17.63)	7.31(7.16-7.46)	1.13(1.08-1.18)
American Samoa	34.40(24.95-43.85)	33.29(24.11-42.47)	26.89(19.33-34.45)	10.47(6.55-14.39)	1.49(0.21-2.77)
Andorra	21.74(12.99-30.49)	20.96(12.78-29.15)	16.26(10.00-22.53)	6.53(3.46-9.60)	0.81(-0.11-1.73)
Angola	13.52(13.27-13.78)	12.63(12.38-12.88)	8.40(8.20-8.59)	2.53(2.43-2.63)	0.21(0.19-0.24)
Antigua and Barbuda	32.76(24.48-41.04)	32.07(24.04-40.09)	24.35(18.60-30.09)	8.73(6.07-11.39)	1.04(0.19-1.89)
Argentina	15.77(15.51-16.03)	15.12(14.87-15.37)	11.58(11.40-11.76)	4.94(4.84-5.04)	0.83(0.79-0.86)
Armenia	28.21(27.00-29.42)	26.78(25.66-27.90)	20.54(19.76-21.32)	8.08(7.65-8.51)	1.14(1.03-1.26)
Australia	28.70(28.09-29.31)	28.22(27.62-28.81)	23.71(23.25-24.17)	10.38(10.15-10.62)	1.64(1.56-1.71)
Austria	42.93(41.87-43.99)	41.17(40.28-42.05)	28.67(28.08-29.27)	8.15(7.88-8.41)	0.39(0.34-0.43)
Azerbaijan	24.78(24.21-25.35)	23.38(22.85-23.91)	17.46(17.06-17.87)	6.19(5.96-6.43)	0.67(0.61-0.73)
Bahamas	25.32(22.68-27.96)	24.70(22.08-27.31)	18.17(16.13-20.20)	6.01(5.03-7.00)	0.62(0.35-0.90)
Bahrain	24.89(22.68-27.09)	23.81(21.66-25.95)	17.82(16.10-19.54)	6.74(5.69-7.78)	0.68(0.35-1.01)
Bangladesh	28.24(28.03-28.44)	26.66(26.47-26.85)	20.11(19.97-20.24)	7.95(7.88-8.02)	1.13(1.10-1.15)
Barbados	33.91(29.58-38.24)	33.23(29.00-37.47)	25.71(22.74-28.69)	9.87(8.44-11.31)	1.38(0.93-1.84)
Belarus	35.98(35.44-36.52)	33.87(33.37-34.37)	22.34(22.05-22.63)	5.45(5.34-5.57)	0.44(0.41-0.46)
Belgium	40.34(39.44-41.24)	39.08(38.27-39.89)	28.32(27.78-28.85)	8.41(8.17-8.65)	0.45(0.41-0.49)
Belize	29.90(25.72-34.09)	29.26(25.11-33.41)	22.36(19.14-25.57)	8.41(6.75-10.07)	1.17(0.64-1.71)
Benin	15.77(15.26-16.27)	14.87(14.38-15.36)	10.39(10.01-10.77)	3.60(3.41-3.80)	0.41(0.35-0.47)
Bermuda	34.29(25.28-43.31)	33.62(24.89-42.36)	26.12(19.87-32.36)	10.19(7.16-13.21)	1.45(0.58-2.31)
Bhutan	30.48(26.72-34.25)	28.90(25.40-32.40)	22.07(19.49-24.64)	8.99(7.73-10.25)	1.41(0.99-1.83)
Bolivia (Plurinational State of)	21.98(21.50-22.45)	21.35(20.88-21.82)	14.88(14.55-15.20)	4.38(4.25-4.52)	0.34(0.31-0.37)
Bosnia and Herzegovina	32.43(31.27-33.59)	30.89(29.87-31.92)	23.96(23.27-24.66)	9.32(8.98-9.66)	1.26(1.16-1.36)
Botswana	17.18(16.40-17.96)	15.91(15.16-16.66)	8.75(8.27-9.23)	1.92(1.73-2.11)	0.11(0.08-0.15)
Brazil	19.83(19.71-19.94)	19.31(19.19-19.42)	15.00(14.91-15.10)	5.87(5.82-5.92)	0.75(0.73-0.76)
Brunei Darussalam	15.28(11.88-18.68)	15.17(11.78-18.57)	11.82(8.95-14.69)	4.54(2.90-6.17)	0.46(-0.15-1.07)
Bulgaria	24.59(24.11-25.07)	23.17(22.73-23.61)	16.98(16.68-17.28)	5.59(5.47-5.71)	0.52(0.49-0.55)
Burkina Faso	14.14(13.82-14.46)	13.29(12.98-13.60)	9.10(8.87-9.33)	2.98(2.87-3.09)	0.31(0.27-0.34)
Burundi	16.08(15.62-16.54)	15.20(14.75-15.65)	10.63(10.28-10.97)	3.48(3.30-3.66)	0.35(0.29-0.40)
Cabo Verde	20.75(17.99-23.51)	19.72(17.06-22.38)	14.34(12.27-16.40)	5.51(4.31-6.70)	0.75(0.41-1.08)
Cambodia	30.35(29.80-30.90)	28.83(28.31-29.36)	20.64(20.25-21.03)	6.31(6.14-6.48)	0.60(0.55-0.65)
Cameroon	13.92(13.67-14.18)	13.05(12.80-13.30)	8.83(8.64-9.03)	2.80(2.71-2.90)	0.27(0.24-0.29)
Canada	25.23(24.75-25.71)	23.70(23.28-24.12)	18.56(18.27-18.86)	9.98(9.81-10.15)	3.03(2.95-3.11)
Central African Republic	7.89(7.59-8.19)	7.18(6.89-7.47)	4.24(4.02-4.45)	0.98(0.88-1.08)	0.05(0.03-0.07)
Chad	14.06(13.68-14.44)	13.22(12.86-13.59)	9.13(8.85-9.41)	3.07(2.93-3.21)	0.34(0.29-0.38)
Chile	20.48(19.97-21.00)	19.75(19.25-20.24)	15.13(14.75-15.51)	6.44(6.25-6.64)	1.14(1.06-1.22)
China	31.38(31.32-31.44)	31.06(31.00-31.11)	27.77(27.72-27.82)	14.72(14.69-14.75)	2.71(2.70-2.72)
Colombia	40.91(40.51-41.31)	40.17(39.78-40.57)	30.02(29.75-30.30)	9.20(9.08-9.32)	0.98(0.94-1.01)
Comoros	19.49(17.30-21.68)	18.55(16.42-20.69)	13.46(11.82-15.10)	4.85(4.04-5.67)	0.58(0.33-0.84)
Congo	14.85(14.27-15.44)	13.93(13.36-14.50)	9.47(9.02-9.93)	3.04(2.80-3.28)	0.29(0.22-0.36)
Cook Islands	37.21(20.19-54.23)	36.15(20.32-51.97)	29.75(17.46-42.04)	12.69(6.29-19.10)	2.10(-0.05-4.25)
Costa Rica	41.81(40.56-43.06)	41.05(39.81-42.28)	31.00(30.11-31.88)	9.86(9.42-10.31)	1.20(1.07-1.32)
Croatia	33.77(32.65-34.89)	32.52(31.51-33.54)	25.50(24.82-26.19)	9.13(8.83-9.43)	1.02(0.94-1.10)
Cuba	29.69(29.18-30.21)	29.02(28.52-29.53)	21.70(21.32-22.08)	7.50(7.34-7.66)	0.85(0.81-0.89)
Cyprus	21.66(19.16-24.16)	21.09(18.68-23.50)	16.54(14.84-18.24)	6.31(5.58-7.04)	0.55(0.35-0.75)
Czechia	40.21(39.39-41.03)	38.18(37.45-38.90)	27.97(27.52-28.42)	9.54(9.37-9.72)	1.21(1.15-1.26)
C么te d'Ivoire	15.64(15.33-15.95)	14.74(14.43-15.05)	10.25(10.01-10.48)	3.56(3.43-3.69)	0.42(0.37-0.46)
Democratic People's Republic of Korea	31.99(31.61-32.36)	31.21(30.84-31.58)	26.73(26.40-27.06)	11.97(11.78-12.15)	1.81(1.75-1.88)
Democratic Republic of the Congo	14.07(13.92-14.23)	13.18(13.04-13.33)	8.85(8.74-8.97)	2.74(2.67-2.80)	0.25(0.23-0.26)
Denmark	22.71(21.55-23.86)	21.96(20.90-23.03)	17.01(16.27-17.75)	6.57(6.26-6.88)	0.68(0.60-0.77)
Djibouti	16.99(15.67-18.30)	16.06(14.78-17.35)	11.29(10.27-12.31)	3.70(3.15-4.24)	0.36(0.17-0.54)
Dominica	27.94(21.32-34.56)	27.28(20.82-33.75)	20.12(15.46-24.78)	6.59(4.40-8.77)	0.64(-0.03-1.31)
Dominican Republic	29.75(29.00-30.49)	29.12(28.38-29.86)	22.31(21.74-22.89)	8.51(8.22-8.80)	1.25(1.15-1.34)
Ecuador	29.46(28.85-30.07)	28.80(28.20-29.41)	21.66(21.22-22.11)	8.27(8.06-8.49)	1.16(1.09-1.22)
Egypt	18.46(18.30-18.62)	17.51(17.35-17.66)	12.47(12.36-12.59)	4.27(4.21-4.33)	0.44(0.42-0.46)
El Salvador	34.62(33.65-35.59)	33.93(32.97-34.89)	24.93(24.23-25.62)	7.35(7.06-7.64)	0.75(0.68-0.83)
Equatorial Guinea	14.19(12.78-15.59)	13.30(11.92-14.67)	9.02(7.94-10.10)	2.87(2.32-3.41)	0.27(0.13-0.40)
Eritrea	14.26(13.69-14.82)	13.39(12.83-13.94)	9.04(8.59-9.49)	2.71(2.47-2.95)	0.22(0.16-0.28)
Estonia	45.60(43.43-47.77)	43.35(41.42-45.29)	30.18(29.03-31.32)	8.80(8.33-9.27)	1.06(0.93-1.18)
Eswatini	8.60(7.97-9.23)	7.66(7.07-8.26)	3.69(3.34-4.05)	0.56(0.46-0.66)	0.01(0.00-0.02)
Ethiopia	18.39(18.19-18.58)	17.45(17.26-17.64)	12.26(12.12-12.40)	4.15(4.09-4.22)	0.46(0.44-0.48)
Fiji	25.62(24.13-27.11)	24.58(23.13-26.03)	18.83(17.67-19.99)	6.02(5.47-6.56)	0.51(0.37-0.65)
Finland	40.88(39.60-42.16)	39.81(38.66-40.97)	31.71(30.96-32.47)	9.64(9.32-9.96)	0.45(0.39-0.51)
France	21.05(20.73-21.36)	20.28(19.99-20.58)	15.71(15.50-15.92)	6.31(6.21-6.41)	0.78(0.76-0.81)
Gabon	14.86(13.93-15.79)	13.92(13.03-14.82)	9.41(8.73-10.09)	2.96(2.59-3.33)	0.27(0.17-0.37)
Gambia	14.99(13.95-16.04)	14.09(13.07-15.10)	9.66(8.89-10.44)	3.19(2.81-3.56)	0.32(0.22-0.42)
Georgia	26.71(25.89-27.53)	25.30(24.53-26.07)	18.32(17.79-18.85)	5.61(5.38-5.85)	0.45(0.41-0.50)
Germany	21.45(21.20-21.71)	20.71(20.48-20.94)	15.89(15.72-16.06)	6.10(6.03-6.18)	0.66(0.64-0.68)
Ghana	15.73(15.45-16.00)	14.79(14.52-15.06)	10.23(10.03-10.44)	3.43(3.32-3.53)	0.36(0.32-0.39)
Greece	21.67(20.99-22.34)	20.97(20.33-21.61)	16.20(15.73-16.66)	6.20(5.99-6.40)	0.67(0.62-0.72)
Greenland	19.79(12.60-26.98)	18.33(12.07-24.59)	13.62(8.66-18.59)	6.50(3.06-9.94)	1.57(-0.52-3.67)
Grenada	26.76(21.60-31.92)	26.09(21.02-31.17)	18.95(15.15-22.74)	5.87(4.21-7.53)	0.42(-0.15-0.99)
Guam	36.35(30.88-41.82)	35.35(29.99-40.71)	29.49(25.02-33.95)	13.54(10.88-16.20)	2.82(1.69-3.96)
Guatemala	33.92(33.28-34.56)	33.23(32.59-33.86)	24.10(23.65-24.55)	6.67(6.49-6.85)	0.56(0.52-0.60)
Guinea	14.49(14.07-14.90)	13.62(13.22-14.02)	9.35(9.06-9.65)	3.08(2.94-3.23)	0.32(0.28-0.36)
Guinea-Bissau	11.23(10.42-12.05)	10.41(9.62-11.20)	6.71(6.11-7.31)	1.89(1.60-2.18)	0.14(0.07-0.21)
Guyana	20.44(19.02-21.87)	19.84(18.44-21.25)	13.79(12.75-14.83)	3.89(3.42-4.36)	0.31(0.19-0.42)
Haiti	19.98(19.54-20.41)	19.41(18.97-19.84)	13.60(13.28-13.92)	3.83(3.69-3.97)	0.28(0.24-0.31)
Honduras	33.25(32.47-34.04)	32.52(31.74-33.29)	22.95(22.43-23.48)	5.60(5.42-5.79)	0.35(0.31-0.38)
Hungary	29.66(29.09-30.23)	28.16(27.64-28.67)	21.42(21.07-21.77)	8.22(8.06-8.39)	1.17(1.11-1.22)
Iceland	22.34(16.78-27.90)	21.65(16.37-26.93)	17.39(13.48-21.29)	7.35(5.33-9.37)	0.96(0.42-1.50)
India	30.27(30.21-30.33)	28.56(28.51-28.62)	21.32(21.28-21.36)	6.99(6.97-7.01)	0.76(0.75-0.76)
Indonesia	31.16(31.03-31.28)	29.63(29.51-29.75)	21.65(21.57-21.74)	6.75(6.71-6.80)	0.65(0.64-0.67)
Iran (Islamic Republic of)	24.01(23.76-24.26)	22.99(22.75-23.23)	17.25(17.07-17.43)	7.12(7.03-7.22)	1.18(1.15-1.21)
Iraq	19.85(19.54-20.17)	18.87(18.56-19.17)	13.67(13.44-13.91)	4.94(4.82-5.06)	0.56(0.53-0.60)
Ireland	22.10(20.71-23.50)	21.33(20.02-22.64)	16.58(15.61-17.55)	6.72(6.28-7.17)	0.83(0.70-0.95)
Israel	22.27(21.11-23.43)	21.48(20.40-22.56)	16.73(15.95-17.51)	6.82(6.45-7.19)	0.87(0.76-0.98)
Italy	33.32(32.90-33.74)	31.14(30.81-31.48)	19.25(19.03-19.48)	5.38(5.30-5.47)	0.18(0.16-0.19)
Jamaica	31.59(30.13-33.05)	30.92(29.48-32.36)	23.45(22.40-24.50)	8.58(8.09-9.07)	1.12(0.97-1.27)
Japan	18.26(18.04-18.49)	18.15(17.92-18.38)	14.13(13.97-14.30)	5.47(5.41-5.53)	0.63(0.62-0.65)
Jordan	27.14(26.23-28.05)	26.03(25.16-26.91)	19.81(19.11-20.51)	8.18(7.79-8.56)	1.38(1.23-1.54)
Kazakhstan	21.94(21.59-22.29)	20.55(20.22-20.89)	14.91(14.65-15.16)	4.91(4.77-5.04)	0.44(0.41-0.47)
Kenya	19.06(18.82-19.29)	18.03(17.79-18.26)	12.29(12.11-12.46)	3.57(3.49-3.65)	0.28(0.26-0.31)
Kiribati	23.66(18.82-28.49)	22.72(17.98-27.45)	17.67(13.63-21.71)	6.09(3.79-8.38)	0.66(-0.02-1.34)
Kuwait	28.42(26.61-30.24)	27.37(25.61-29.13)	21.46(19.98-22.94)	9.94(9.02-10.86)	2.09(1.76-2.41)
Kyrgyzstan	22.92(22.09-23.75)	21.61(20.81-22.40)	16.72(16.06-17.38)	6.80(6.39-7.21)	0.96(0.83-1.09)
Lao People's Democratic Republic	31.25(30.35-32.15)	29.73(28.87-30.59)	21.47(20.84-22.09)	6.81(6.52-7.09)	0.72(0.64-0.80)
Latvia	39.42(38.08-40.77)	37.27(36.03-38.52)	25.14(24.39-25.90)	6.73(6.44-7.01)	0.71(0.64-0.78)
Lebanon	23.30(22.28-24.32)	22.30(21.33-23.28)	16.85(16.14-17.56)	6.84(6.53-7.16)	1.00(0.91-1.09)
Lesotho	6.70(6.32-7.08)	5.88(5.53-6.22)	2.67(2.48-2.86)	0.36(0.32-0.41)	0.01(0.00-0.01)
Liberia	16.67(15.85-17.50)	15.75(14.95-16.56)	11.13(10.50-11.76)	3.98(3.64-4.33)	0.50(0.39-0.60)
Libya	21.36(20.58-22.14)	20.39(19.63-21.16)	15.16(14.55-15.77)	5.95(5.62-6.27)	0.85(0.75-0.96)
Lithuania	43.46(42.27-44.64)	41.22(40.13-42.31)	27.68(27.04-28.33)	6.86(6.62-7.10)	0.70(0.64-0.75)
Luxembourg	23.59(19.88-27.29)	22.78(19.36-26.20)	17.60(15.05-20.16)	6.89(5.65-8.12)	0.76(0.43-1.08)
Madagascar	16.14(15.82-16.45)	15.24(14.93-15.55)	10.58(10.34-10.82)	3.38(3.25-3.51)	0.31(0.28-0.35)
Malawi	11.83(11.56-12.09)	10.99(10.74-11.25)	7.04(6.85-7.23)	1.81(1.73-1.89)	0.11(0.09-0.12)
Malaysia	35.40(34.96-35.83)	33.79(33.37-34.20)	24.79(24.50-25.08)	8.39(8.25-8.52)	1.08(1.04-1.13)
Maldives	45.07(39.01-51.13)	43.43(37.69-49.16)	33.68(29.08-38.29)	13.59(10.79-16.39)	2.37(1.54-3.19)
Mali	14.19(13.87-14.51)	13.33(13.03-13.64)	9.17(8.94-9.40)	3.02(2.91-3.14)	0.30(0.27-0.34)
Malta	28.24(23.69-32.79)	27.55(23.21-31.89)	20.52(17.66-23.38)	7.51(6.25-8.78)	0.82(0.46-1.18)
Marshall Islands	26.72(19.38-34.07)	25.70(18.49-32.90)	20.07(14.12-26.02)	6.99(3.86-10.13)	0.81(-0.40-2.02)
Mauritania	20.70(19.43-21.96)	19.71(18.50-20.93)	14.50(13.63-15.38)	5.78(5.32-6.23)	0.87(0.71-1.03)
Mauritius	36.09(34.30-37.87)	34.43(32.74-36.11)	25.32(24.16-26.49)	8.71(8.13-9.29)	1.20(0.99-1.40)
Mexico	35.61(35.43-35.80)	34.73(34.55-34.91)	25.09(24.96-25.22)	6.77(6.71-6.82)	0.64(0.63-0.65)
Micronesia (Federated States of)	26.79(21.44-32.13)	25.80(20.56-31.04)	20.35(15.92-24.77)	7.49(4.82-10.16)	0.93(0.01-1.84)
Monaco	19.87(9.60-30.14)	19.11(9.74-28.48)	14.59(7.89-21.30)	5.55(2.72-8.37)	0.56(-0.18-1.30)
Mongolia	22.09(21.10-23.09)	20.78(19.81-21.74)	15.46(14.64-16.28)	5.69(5.21-6.18)	0.69(0.55-0.83)
Montenegro	29.12(26.76-31.48)	27.61(25.46-29.76)	20.88(19.47-22.30)	7.38(6.73-8.03)	0.67(0.53-0.81)
Morocco	22.40(22.05-22.75)	21.41(21.08-21.74)	16.01(15.77-16.25)	6.28(6.16-6.41)	0.87(0.83-0.91)
Mozambique	10.55(10.36-10.74)	9.77(9.59-9.95)	6.16(6.03-6.29)	1.55(1.49-1.61)	0.09(0.08-0.10)
Myanmar	29.53(29.26-29.79)	28.04(27.78-28.29)	20.03(19.85-20.21)	6.16(6.08-6.24)	0.60(0.58-0.62)
Namibia	14.42(13.71-15.13)	13.29(12.60-13.97)	7.65(7.19-8.11)	1.73(1.55-1.90)	0.09(0.06-0.12)
Nauru	19.91(5.32-34.50)	19.01(4.78-33.24)	14.42(2.82-26.02)	4.67(-0.88-10.22)	0.46(-1.14-2.07)
Nepal	20.31(19.97-20.66)	18.71(18.39-19.02)	13.00(12.78-13.21)	4.48(4.38-4.58)	0.47(0.44-0.50)
Netherlands	21.77(21.08-22.45)	20.99(20.37-21.61)	16.30(15.86-16.75)	6.50(6.31-6.69)	0.71(0.66-0.76)
New Zealand	30.58(29.21-31.96)	30.05(28.72-31.38)	25.40(24.37-26.44)	10.87(10.32-11.42)	1.54(1.38-1.70)
Nicaragua	37.35(36.25-38.45)	36.61(35.52-37.69)	26.79(26.02-27.57)	7.60(7.27-7.93)	0.70(0.62-0.79)
Niger	15.90(15.50-16.31)	15.03(14.64-15.42)	10.62(10.32-10.92)	3.81(3.65-3.97)	0.47(0.41-0.53)
Nigeria	17.81(17.66-17.96)	16.90(16.75-17.04)	12.09(11.98-12.21)	4.54(4.48-4.60)	0.63(0.61-0.65)
Niue	30.68(-29.34-90.69)	29.65(-20.54-79.83)	23.69(-11.79-59.17)	8.78(-9.79-27.36)	1.08(-3.44-5.59)
North Macedonia	28.59(27.45-29.73)	27.07(26.04-28.11)	20.40(19.69-21.10)	7.18(6.86-7.50)	0.65(0.57-0.74)
Northern Mariana Islands	32.41(23.99-40.83)	31.38(23.24-39.52)	25.41(18.57-32.24)	10.01(6.23-13.78)	1.36(0.06-2.66)
Norway	49.02(47.57-50.47)	46.95(45.79-48.11)	33.02(32.24-33.80)	9.45(9.07-9.83)	0.55(0.47-0.62)
Oman	21.98(20.70-23.26)	20.98(19.73-22.24)	15.58(14.56-16.60)	5.88(5.32-6.44)	0.70(0.53-0.88)
Pakistan	24.10(23.95-24.24)	22.57(22.43-22.71)	16.11(16.01-16.22)	5.49(5.44-5.54)	0.62(0.60-0.63)
Palau	31.28(19.26-43.29)	30.27(18.51-42.04)	24.60(14.52-34.69)	10.16(4.04-16.28)	1.66(-1.09-4.40)
Palestine	23.02(21.70-24.34)	22.01(20.76-23.27)	16.50(15.53-17.46)	6.60(6.06-7.13)	0.89(0.69-1.10)
Panama	43.88(42.37-45.39)	43.12(41.65-44.60)	32.69(31.64-33.74)	10.50(9.99-11.01)	1.29(1.14-1.43)
Papua New Guinea	24.83(24.26-25.41)	23.91(23.34-24.48)	18.66(18.19-19.12)	6.39(6.16-6.61)	0.64(0.57-0.70)
Paraguay	22.38(21.64-23.11)	21.84(21.11-22.56)	16.76(16.20-17.33)	6.06(5.78-6.35)	0.64(0.55-0.72)
Peru	26.58(26.23-26.93)	25.92(25.57-26.27)	19.01(18.75-19.26)	6.68(6.56-6.79)	0.77(0.74-0.80)
Philippines	30.36(30.16-30.55)	28.55(28.37-28.74)	19.83(19.70-19.95)	5.91(5.86-5.97)	0.60(0.58-0.62)
Poland	27.17(26.89-27.46)	25.96(25.70-26.23)	20.85(20.66-21.04)	9.16(9.05-9.26)	1.50(1.46-1.54)
Portugal	21.20(20.50-21.91)	20.41(19.75-21.07)	15.67(15.19-16.15)	6.13(5.91-6.36)	0.69(0.64-0.75)
Puerto Rico	35.24(33.89-36.58)	34.57(33.25-35.88)	26.97(26.02-27.91)	11.03(10.57-11.49)	1.94(1.79-2.09)
Qatar	28.50(25.62-31.38)	27.38(24.55-30.21)	21.07(18.57-23.58)	8.88(7.26-10.50)	1.38(0.71-2.05)
Republic of Korea	16.21(15.91-16.51)	16.10(15.80-16.40)	12.91(12.66-13.15)	5.36(5.24-5.49)	0.70(0.66-0.74)
Republic of Moldova	39.19(38.18-40.19)	37.02(36.09-37.95)	24.89(24.35-25.44)	6.50(6.28-6.72)	0.71(0.65-0.77)
Romania	32.11(31.72-32.49)	30.58(30.23-30.94)	23.06(22.82-23.30)	7.34(7.23-7.44)	0.73(0.70-0.75)
Russian Federation	37.13(36.98-37.27)	35.01(34.88-35.15)	22.60(22.52-22.67)	5.58(5.55-5.61)	0.53(0.52-0.53)
Rwanda	16.89(16.42-17.37)	15.98(15.51-16.44)	11.19(10.84-11.54)	3.66(3.47-3.85)	0.35(0.29-0.40)
Saint Kitts and Nevis	28.21(20.99-35.42)	27.54(20.45-34.62)	20.37(15.10-25.64)	6.71(3.89-9.53)	0.65(-0.21-1.51)
Saint Lucia	30.30(25.66-34.95)	29.64(25.05-34.22)	22.28(18.85-25.71)	7.81(6.25-9.38)	0.89(0.45-1.32)
Saint Vincent and the Grenadines	29.94(24.23-35.66)	29.28(23.63-34.93)	22.07(17.82-26.32)	7.91(5.88-9.94)	0.93(0.36-1.50)
Samoa	33.33(27.81-38.86)	32.31(26.91-37.71)	26.31(21.85-30.77)	10.68(8.30-13.05)	1.57(0.78-2.36)
San Marino	22.92(4.46-41.38)	22.14(6.11-38.17)	17.34(5.47-29.21)	7.27(1.58-12.95)	1.10(-0.39-2.59)
Sao Tome and Principe	20.36(15.23-25.49)	19.34(14.39-24.29)	13.94(10.19-17.69)	5.27(3.19-7.34)	0.71(0.04-1.39)
Saudi Arabia	23.18(22.75-23.61)	22.19(21.76-22.61)	16.78(16.42-17.14)	7.01(6.78-7.23)	1.17(1.06-1.28)
Senegal	17.41(16.95-17.88)	16.44(15.99-16.89)	11.56(11.23-11.89)	4.02(3.85-4.18)	0.45(0.40-0.50)
Serbia	33.70(32.98-34.41)	32.13(31.49-32.77)	24.55(24.14-24.96)	8.46(8.29-8.63)	0.97(0.92-1.02)
Seychelles	37.24(30.03-44.46)	35.57(28.70-42.43)	26.31(21.20-31.42)	8.92(6.45-11.40)	1.05(0.30-1.80)
Sierra Leone	15.60(15.02-16.18)	14.74(14.18-15.31)	10.43(10.00-10.86)	3.79(3.56-4.01)	0.49(0.42-0.57)
Singapore	17.18(16.00-18.36)	17.07(15.89-18.24)	13.75(12.85-14.65)	5.91(5.43-6.39)	0.93(0.76-1.11)
Slovakia	32.97(32.09-33.85)	31.36(30.56-32.16)	23.51(22.98-24.04)	7.65(7.41-7.88)	0.73(0.67-0.80)
Slovenia	31.34(29.56-33.13)	30.31(28.67-31.95)	24.34(23.17-25.51)	10.71(10.11-11.30)	1.90(1.69-2.10)
Solomon Islands	25.71(23.34-28.07)	24.76(22.43-27.09)	19.49(17.51-21.47)	7.13(6.12-8.14)	0.86(0.55-1.18)
Somalia	9.15(8.92-9.38)	8.41(8.19-8.62)	5.02(4.87-5.17)	1.08(1.02-1.14)	0.04(0.03-0.06)
South Africa	17.24(17.08-17.39)	16.09(15.94-16.24)	9.92(9.82-10.03)	2.83(2.78-2.88)	0.27(0.26-0.28)
South Sudan	12.20(11.84-12.56)	11.43(11.08-11.79)	7.69(7.41-7.96)	2.26(2.12-2.39)	0.18(0.15-0.21)
Spain	20.77(20.38-21.16)	19.99(19.63-20.35)	14.89(14.64-15.14)	5.71(5.60-5.83)	0.69(0.65-0.72)
Sri Lanka	39.85(39.26-40.44)	38.17(37.62-38.72)	28.64(28.26-29.02)	10.39(10.21-10.58)	1.50(1.43-1.57)
Sudan	19.52(19.18-19.87)	18.60(18.27-18.93)	13.66(13.40-13.91)	5.15(5.02-5.27)	0.66(0.62-0.70)
Suriname	27.32(24.98-29.67)	26.68(24.37-29.00)	19.79(17.99-21.59)	6.85(5.94-7.75)	0.83(0.56-1.10)
Sweden	27.03(25.96-28.09)	26.30(25.33-27.28)	20.19(19.50-20.88)	7.82(7.51-8.12)	0.93(0.85-1.00)
Switzerland	46.92(45.82-48.02)	45.55(44.66-46.44)	30.90(30.28-31.51)	8.71(8.40-9.03)	0.48(0.43-0.53)
Syrian Arab Republic	21.69(21.20-22.18)	20.72(20.25-21.18)	15.49(15.13-15.85)	6.17(5.97-6.36)	0.88(0.81-0.94)
Taiwan (Province of China)	45.45(44.90-46.00)	43.84(43.34-44.35)	37.54(37.14-37.94)	18.48(18.23-18.72)	3.61(3.53-3.70)
Tajikistan	25.03(24.28-25.78)	23.66(22.95-24.37)	17.85(17.29-18.40)	6.62(6.30-6.94)	0.84(0.75-0.94)
Thailand	37.57(37.30-37.83)	36.03(35.78-36.29)	27.42(27.23-27.61)	10.63(10.53-10.73)	1.86(1.83-1.90)
Timor-Leste	32.68(30.34-35.03)	31.17(28.93-33.40)	22.70(21.17-24.22)	7.35(6.71-7.99)	0.81(0.60-1.01)
Togo	14.88(14.35-15.41)	13.99(13.47-14.51)	9.58(9.17-10.00)	3.17(2.94-3.39)	0.33(0.26-0.41)
Tokelau	33.58(-70.16-137.32)	32.60(-55.44-120.64)	26.74(-31.57-85.05)	11.17(-18.14-40.49)	1.73(-7.20-10.67)
Tonga	34.35(26.10-42.60)	33.31(25.30-41.32)	27.20(20.69-33.71)	11.03(7.80-14.27)	1.62(0.64-2.60)
Trinidad and Tobago	27.62(26.23-29.01)	26.96(25.60-28.33)	19.97(18.99-20.94)	6.80(6.35-7.25)	0.76(0.62-0.90)
Tunisia	22.35(21.80-22.91)	21.37(20.83-21.90)	15.99(15.61-16.37)	6.32(6.12-6.51)	0.85(0.78-0.91)
Turkey	22.95(22.72-23.18)	21.97(21.75-22.19)	16.60(16.44-16.76)	6.81(6.73-6.90)	1.03(1.00-1.06)
Turkmenistan	21.74(21.02-22.46)	20.41(19.72-21.11)	15.01(14.47-15.56)	5.21(4.90-5.52)	0.56(0.48-0.64)
Tuvalu	28.75(11.14-46.36)	27.77(10.79-44.75)	22.16(8.72-35.60)	8.47(1.42-15.52)	1.12(-1.28-3.51)
Uganda	14.28(14.03-14.52)	13.41(13.17-13.65)	9.06(8.88-9.25)	2.70(2.62-2.79)	0.22(0.20-0.24)
Ukraine	38.57(38.30-38.84)	36.42(36.17-36.68)	23.78(23.63-23.92)	6.12(6.07-6.18)	0.62(0.61-0.63)
United Arab Emirates	28.62(27.13-30.11)	27.56(26.10-29.03)	21.58(20.23-22.93)	9.69(8.63-10.75)	1.84(1.22-2.46)
United Kingdom	27.20(26.85-27.55)	25.88(25.57-26.20)	19.38(19.16-19.61)	6.86(6.77-6.96)	0.55(0.53-0.57)
United Republic of Tanzania	16.68(16.45-16.90)	15.78(15.56-16.00)	11.12(10.95-11.29)	3.71(3.62-3.79)	0.37(0.35-0.40)
United States of America	22.32(22.22-22.43)	20.93(20.83-21.03)	16.57(16.49-16.64)	8.65(8.60-8.69)	2.38(2.36-2.40)
United States Virgin Islands	31.65(24.67-38.64)	31.03(24.17-37.89)	24.02(19.31-28.72)	9.42(7.23-11.61)	1.38(0.62-2.15)
Uruguay	15.02(14.21-15.82)	14.38(13.62-15.15)	10.92(10.37-11.48)	4.61(4.32-4.90)	0.76(0.65-0.86)
Uzbekistan	27.63(27.20-28.07)	26.24(25.83-26.66)	20.15(19.83-20.47)	7.85(7.65-8.04)	1.05(0.99-1.11)
Vanuatu	24.11(21.09-27.12)	23.16(20.21-26.12)	18.05(15.60-20.50)	6.25(5.02-7.47)	0.66(0.30-1.02)
Venezuela (Bolivarian Republic of)	32.90(32.53-33.26)	32.21(31.85-32.57)	23.19(22.94-23.44)	6.23(6.13-6.34)	0.49(0.46-0.51)
Viet Nam	38.49(38.24-38.74)	36.58(36.34-36.81)	26.13(25.96-26.29)	8.01(7.93-8.09)	0.85(0.83-0.87)
Yemen	16.55(16.23-16.88)	15.70(15.38-16.02)	11.29(11.05-11.53)	3.97(3.85-4.10)	0.44(0.40-0.48)
Zambia	11.55(11.29-11.80)	10.71(10.46-10.96)	6.83(6.64-7.02)	1.70(1.62-1.78)	0.09(0.08-0.10)
Zimbabwe	11.25(11.01-11.48)	10.20(9.97-10.43)	5.40(5.26-5.55)	1.00(0.95-1.05)	0.04(0.03-0.04)

## Sheet: Supplementary Table 2
Supplementary Table 2. Average annual percent change (AAPC) of developing BPH from 1990 to 2021.
location name	start year	end year	AAPC	AAPC CI Low	AAPC CI High	statistically significant (0=No, 1=Yes)	test statistic	P value
Afghanistan	1990	2021	0.0634	-0.3756	0.5044	0	0.2826	0.777507
Albania	1990	2021	0.4067	0.0406	0.7742	1	2.1776	0.029439
Algeria	1990	2021	0.1916	0.1437	0.2396	1	7.8383	0
American Samoa	1990	2021	0.3617	0.3286	0.3949	1	22.328	0
Andean Latin America	1990	2021	-0.1344	-0.3679	0.0995	0	-1.1267	0.259863
Andorra	1990	2021	0.3971	0.3189	0.4754	1	9.9638	0
Angola	1990	2021	1.0702	0.6799	1.462	1	5.3928	0
Antigua and Barbuda	1990	2021	0.4512	0.1623	0.7409	1	3.0633	0.002189
Argentina	1990	2021	0.5281	0.3454	0.7111	1	5.6757	0
Armenia	1990	2021	0.5328	0.3064	0.7596	1	4.8148	3.9e-05
Australasia	1990	2021	0.5878	0.5278	0.6478	1	19.2647	0
Australia	1990	2021	0.6647	0.5953	0.7341	1	18.8356	0
Austria	1990	2021	0.9594	0.8998	1.019	1	31.7216	0
Azerbaijan	1990	2021	0.2293	-0.1185	0.5784	0	1.2913	0.196608
Bahamas	1990	2021	-0.0641	-0.2478	0.1199	0	-0.6832	0.494461
Bahrain	1990	2021	0.6921	0.6167	0.7675	1	18.0452	0
Bangladesh	1990	2021	1.1692	0.9235	1.4154	1	9.37	0
Barbados	1990	2021	0.3998	0.2223	0.5776	1	4.4204	1e-05
Belarus	1990	2021	-0.1755	-0.5903	0.2409	0	-0.8271	0.408161
Belgium	1990	2021	0.4547	0.4016	0.5078	1	16.807	0
Belize	1990	2021	-0.0789	-0.3384	0.1812	0	-0.5953	0.551643
Benin	1990	2021	0.3995	0.3209	0.4781	1	9.9782	0
Bermuda	1990	2021	0.8034	0.6806	0.9264	1	12.8648	0
Bhutan	1990	2021	1.1492	1.0786	1.2198	1	32.1005	0
Bolivia (Plurinational State of)	1990	2021	-0.069	-0.3417	0.2045	0	-0.495	0.620611
Bosnia and Herzegovina	1990	2021	0.6612	-0.3208	1.6529	0	1.3175	0.187663
Botswana	1990	2021	-0.5026	-0.9571	-0.046	1	-2.1571	0.030996
Brazil	1990	2021	-0.2154	-0.2908	-0.14	1	-5.5928	0
Brunei Darussalam	1990	2021	0.682	0.5385	0.8256	1	9.3433	0
Bulgaria	1990	2021	-0.1523	-0.4267	0.1229	0	-1.0851	0.277886
Burkina Faso	1990	2021	0.5707	0.41	0.7317	1	6.9755	0
Burundi	1990	2021	1.4673	0.2692	2.6797	1	2.4035	0.016239
Cabo Verde	1990	2021	0.0408	-0.2285	0.3107	0	0.2964	0.766959
Cambodia	1990	2021	1.0337	0.9587	1.1088	1	27.1382	0
Cameroon	1990	2021	-0.2785	-0.4536	-0.1031	1	-3.1107	0.001866
Canada	1990	2021	0.598	0.4	0.7963	1	5.9314	0
Caribbean	1990	2021	0.3332	0.0984	0.5686	1	2.9	0.00692
Central African Republic	1990	2021	0.1027	-0.4104	0.6185	0	0.3916	0.695336
Central Asia	1990	2021	0.2833	-0.0907	0.6587	0	1.484	0.137807
Central Europe	1990	2021	0.1351	-0.0527	0.3232	0	1.4092	0.158772
Central Latin America	1990	2021	-0.0898	-0.2769	0.0977	0	-0.9395	0.347488
Central Sub-Saharan Africa	1990	2021	0.561	0.3996	0.7226	1	6.8266	0
Chad	1990	2021	0.0364	-0.2441	0.3176	0	0.2537	0.799721
Chile	1990	2021	0.6814	0.5912	0.7717	1	14.8422	0
China	1990	2021	0.5601	0.4833	0.637	1	14.32	0
Colombia	1990	2021	0.5103	0.3059	0.715	1	4.902	1e-06
Comoros	1990	2021	0.6849	0.4621	0.9082	1	6.0391	0
Congo	1990	2021	0.9578	0.6155	1.3014	1	5.4999	0
Cook Islands	1990	2021	0.6778	0.5969	0.7588	1	16.4649	0
Costa Rica	1990	2021	0.009	-0.1628	0.181	0	0.1024	0.918461
Croatia	1990	2021	0.6546	0.3984	0.9114	1	5.0174	1e-06
Cuba	1990	2021	-0.0912	-0.2251	0.0428	0	-1.3343	0.182118
Cyprus	1990	2021	0.444	0.3228	0.5653	1	7.1952	0
Czechia	1990	2021	0.9166	0.7096	1.1239	1	8.7107	0
C么te d'Ivoire	1990	2021	0.597	0.4256	0.7688	1	6.8393	0
Democratic People's Republic of Korea	1990	2021	0.2961	-0.4094	1.0067	0	0.821	0.411669
Democratic Republic of the Congo	1990	2021	0.4615	0.1915	0.7321	1	3.3533	0.000798
Denmark	1990	2021	0.6575	0.449	0.8665	1	6.1942	0
Djibouti	1990	2021	0.0129	-0.0653	0.0912	0	0.3243	0.745736
Dominica	1990	2021	0.1546	-0.0068	0.3163	0	1.8779	0.0604
Dominican Republic	1990	2021	-0.0096	-0.2702	0.2516	0	-0.0722	0.942417
East Asia	1990	2021	0.556	0.4806	0.6315	1	14.4862	0
Eastern Europe	1990	2021	-0.1107	-0.7996	0.583	0	-0.3136	0.753811
Eastern Sub-Saharan Africa	1990	2021	0.7596	0.2701	1.2516	1	3.0453	0.002324
Ecuador	1990	2021	-0.0916	-0.439	0.257	0	-0.5157	0.606092
Egypt	1990	2021	0.2423	0.0941	0.3907	1	3.2066	0.001343
El Salvador	1990	2021	0.2424	-0.3698	0.8585	0	0.7747	0.438519
Equatorial Guinea	1990	2021	1.2724	1.0396	1.5058	1	10.7658	0
Eritrea	1990	2021	2.4463	1.148	3.7614	1	3.7139	0.000204
Estonia	1990	2021	0.6994	0.0702	1.3326	1	2.1794	0.029304
Eswatini	1990	2021	-2.0398	-2.5585	-1.5184	1	-7.6092	0
Ethiopia	1990	2021	2.2065	1.8165	2.5979	1	11.1901	0
Fiji	1990	2021	0.184	-0.0332	0.4017	0	1.6598	0.096949
Finland	1990	2021	0.6688	0.5219	0.8159	1	8.946	0
France	1990	2021	0.5098	0.4048	0.6149	1	9.536	0
Gabon	1990	2021	0.364	0.2106	0.5175	1	4.6575	3e-06
Gambia	1990	2021	-0.0008	-0.1699	0.1686	0	-0.0091	0.99277
Georgia	1990	2021	0.2631	-0.1798	0.7079	0	1.1632	0.244732
Germany	1990	2021	0.5935	0.4618	0.7253	1	8.8543	0
Ghana	1990	2021	0.0456	-0.0841	0.1754	0	0.6882	0.491314
Global	1990	2021	0.3923	0.3377	0.4469	1	14.1053	0
Greece	1990	2021	0.377	0.2282	0.5262	1	4.9689	1e-06
Greenland	1990	2021	1.2616	1.1381	1.3851	1	20.1469	0
Grenada	1990	2021	0.1221	-0.0901	0.3348	0	1.127	0.259744
Guam	1990	2021	0.1869	-0.098	0.4726	0	1.2852	0.198724
Guatemala	1990	2021	0.535	0.057	1.0152	1	2.1943	0.028213
Guinea	1990	2021	-0.0222	-0.2335	0.1895	0	-0.2056	0.837111
Guinea-Bissau	1990	2021	0.5347	0.0975	0.9737	1	2.3985	0.016462
Guyana	1990	2021	0.0646	-0.2508	0.3811	0	0.4011	0.688377
Haiti	1990	2021	0.8466	-0.1469	1.85	0	1.739	0.092293
High SDI	1990	2021	0.3619	0.2912	0.4326	1	10.0497	0
High-income Asia Pacific	1990	2021	0.2717	0.1984	0.345	1	7.2745	0
High-income North America	1990	2021	0.5208	0.373	0.6688	1	6.9175	0
High-middle SDI	1990	2021	0.2518	0.1058	0.398	1	3.3822	0.000719
Honduras	1990	2021	-0.1381	-0.6183	0.3444	0	-0.562	0.574103
Hungary	1990	2021	0.7827	0.3874	1.1796	1	3.888	0.000101
Iceland	1990	2021	0.4797	0.3534	0.6061	1	7.4602	0
India	1990	2021	0.7353	0.5235	0.9475	1	6.8239	0
Indonesia	1990	2021	-0.3918	-0.5013	-0.2822	1	-6.9952	0
Iran (Islamic Republic of)	1990	2021	0.3057	0.1517	0.46	1	3.893	9.9e-05
Iraq	1990	2021	0.2112	-0.5835	1.0122	0	0.5194	0.603509
Ireland	1990	2021	0.7633	0.6887	0.838	1	20.1268	0
Israel	1990	2021	0.4422	0.3125	0.5721	1	6.6924	0
Italy	1990	2021	0.1988	0.0529	0.3449	1	2.6719	0.007542
Jamaica	1990	2021	0.2116	0.0475	0.376	1	2.6346	0.013198
Japan	1990	2021	0.1448	0.0782	0.2114	1	4.2655	2e-05
Jordan	1990	2021	0.474	0.3692	0.579	1	8.88	0
Kazakhstan	1990	2021	0.1056	-0.3747	0.5883	0	0.4301	0.667107
Kenya	1990	2021	-0.4811	-0.574	-0.388	1	-10.1156	0
Kiribati	1990	2021	0.6961	0.6187	0.7735	1	18.4345	0
Kuwait	1990	2021	0.304	-0.0385	0.6476	0	1.7392	0.081997
Kyrgyzstan	1990	2021	0.4559	-0.042	0.9563	0	1.7944	0.072748
Lao People's Democratic Republic	1990	2021	1.6703	1.5953	1.7454	1	43.9973	0
Latvia	1990	2021	0.2698	-0.6748	1.2233	0	0.5579	0.57691
Lebanon	1990	2021	0.5956	0.4379	0.7535	1	7.4196	0
Lesotho	1990	2021	-2.8038	-4.3863	-1.1951	1	-3.3955	0.000685
Liberia	1990	2021	1.516	1.0275	2.0069	1	6.1134	0
Libya	1990	2021	-0.2676	-0.4704	-0.0644	1	-2.5803	0.009873
Lithuania	1990	2021	0.2226	-0.3722	0.8209	0	0.7322	0.464067
location name	year (start)	year (stop)	AAPC	95%CI (low)	95%CI (upper)	statistically significant (0=No, 1=Yes)	test statistic	P value
Low SDI	1990	2021	0.7504	0.5265	0.9748	1	6.5852	0
Low-middle SDI	1990	2021	0.4129	0.345	0.4809	1	11.938	0
Luxembourg	1990	2021	0.8606	0.7296	0.9917	1	12.923	0
Madagascar	1990	2021	0.2737	0.1838	0.3638	1	5.9706	0
Malawi	1990	2021	0.1814	-0.0814	0.445	0	1.3523	0.176266
Malaysia	1990	2021	0.252	0.1428	0.3613	1	4.7158	5.2e-05
Maldives	1990	2021	1.1292	1.0113	1.2472	1	18.8666	0
Mali	1990	2021	0.2464	-0.1513	0.6456	0	1.2133	0.225002
Malta	1990	2021	0.4629	0.3071	0.6189	1	5.8337	0
Marshall Islands	1990	2021	0.7493	0.6253	0.8735	1	11.8774	0
Mauritania	1990	2021	0.7113	0.5433	0.8795	1	8.3206	0
Mauritius	1990	2021	0.566	0.4547	0.6775	1	9.9843	0
Mexico	1990	2021	-0.3694	-0.6378	-0.1003	1	-2.6893	0.007161
Micronesia (Federated States of)	1990	2021	0.5955	0.524	0.667	1	16.3646	0
Middle SDI	1990	2021	0.3318	0.2527	0.4111	1	8.2248	0
Monaco	1990	2021	0.193	0.0815	0.3047	1	3.393	0.000691
Mongolia	1990	2021	0.5403	0.1136	0.9689	1	2.4832	0.013019
Montenegro	1990	2021	-0.1859	-0.3464	-0.0252	1	-2.2667	0.023411
Morocco	1990	2021	0.3398	0.1521	0.5277	1	3.5518	0.000383
Mozambique	1990	2021	-0.3964	-0.4726	-0.3201	1	-10.1665	0
Myanmar	1990	2021	1.3754	0.999	1.7533	1	7.1972	0
Namibia	1990	2021	-0.6613	-1.0315	-0.2896	1	-3.4823	0.000497
Nauru	1990	2021	0.2503	0.1043	0.3965	1	3.3619	0.000774
Nepal	1990	2021	0.4631	0.3553	0.571	1	8.4362	0
Netherlands	1990	2021	0.5101	0.3877	0.6328	1	8.1794	0
New Zealand	1990	2021	0.3045	0.2038	0.4053	1	5.9323	0
Nicaragua	1990	2021	-0.1832	-0.3152	-0.051	1	-2.7157	0.006614
Niger	1990	2021	0.9578	0.7738	1.1422	1	10.2416	0
Nigeria	1990	2021	0.5507	0.4971	0.6043	1	20.1936	0
Niue	1990	2021	0.2042	0.0666	0.342	1	2.9096	0.003619
North Africa and Middle East	1990	2021	0.402	0.3238	0.4803	1	10.0931	0
North Macedonia	1990	2021	0.0472	-0.1135	0.2081	0	0.5753	0.565067
Northern Mariana Islands	1990	2021	-0.0269	-0.0699	0.0161	0	-1.2268	0.219898
Norway	1990	2021	0.4499	0.3913	0.5085	1	15.0826	0
Oceania	1990	2021	0.1432	0.0518	0.2347	1	3.0703	0.002138
Oman	1990	2021	0.478	0.2686	0.6878	1	4.4808	7e-06
Pakistan	1990	2021	-0.0851	-0.2166	0.0466	0	-1.2668	0.205219
Palau	1990	2021	0.6209	0.552	0.6898	1	17.7112	0
Palestine	1990	2021	0.4841	-0.2185	1.1917	0	1.3489	0.177369
Panama	1990	2021	0.1613	0.0043	0.3186	1	2.0139	0.044022
Papua New Guinea	1990	2021	0.0758	-0.0724	0.2242	0	1.0025	0.316126
Paraguay	1990	2021	-0.3511	-0.476	-0.2259	1	-5.4928	0
Peru	1990	2021	-0.0294	-0.2794	0.2212	0	-0.2303	0.817831
Philippines	1990	2021	-0.2593	-0.3782	-0.1402	1	-4.2654	2e-05
Poland	1990	2021	-0.6302	-1.0636	-0.195	1	-2.835	0.004582
Portugal	1990	2021	0.6523	0.5463	0.7585	1	12.0903	0
Puerto Rico	1990	2021	0.6538	0.4478	0.8603	1	6.234	0
Qatar	1990	2021	1.0158	0.513	1.5211	1	3.9701	7.2e-05
Republic of Korea	1990	2021	1.3053	1.2227	1.3879	1	31.1763	0
Republic of Moldova	1990	2021	0.1455	-0.6232	0.9201	0	0.3697	0.711573
Romania	1990	2021	0.1336	-0.3078	0.5769	0	0.5924	0.553602
Russian Federation	1990	2021	-0.1513	-1.1572	0.8648	0	-0.2931	0.76942
Rwanda	1990	2021	1.6445	0.5715	2.729	1	3.0123	0.002593
Saint Kitts and Nevis	1990	2021	0.4536	0.328	0.5793	1	7.0914	0
Saint Lucia	1990	2021	0.3823	0.3454	0.4193	1	20.3057	0
Saint Vincent and the Grenadines	1990	2021	0.2304	0.0963	0.3648	1	3.3685	0.000756
Samoa	1990	2021	0.4658	0.4058	0.5259	1	15.2485	0
San Marino	1990	2021	0.4356	0.3541	0.5173	1	10.4867	0
Sao Tome and Principe	1990	2021	0.3606	0.2278	0.4936	1	5.3279	0
Saudi Arabia	1990	2021	0.4588	0.3027	0.6152	1	5.7681	0
Senegal	1990	2021	0.433	0.3532	0.5129	1	10.6502	0
Serbia	1990	2021	0.377	0.1269	0.6277	1	2.9561	0.003115
Seychelles	1990	2021	0.7091	0.3868	1.0324	1	4.3208	1.6e-05
Sierra Leone	1990	2021	0.7655	0.3643	1.1683	1	3.7463	0.000179
Singapore	1990	2021	0.8938	0.8249	0.9627	1	25.5373	0
Slovakia	1990	2021	0.6861	0.4843	0.8883	1	6.6785	0
Slovenia	1990	2021	0.9205	0.6209	1.2209	1	6.0417	0
Solomon Islands	1990	2021	0.7974	0.742	0.8528	1	28.3022	0
Somalia	1990	2021	0.5959	-0.2205	1.419	0	1.489	0.146918
South Africa	1990	2021	-0.8178	-1.1721	-0.4623	1	-4.4983	7e-06
South Asia	1990	2021	0.7067	0.5319	0.8818	1	7.9463	0
South Sudan	1990	2021	-0.1313	-0.5368	0.2758	0	-0.633	0.526739
Southeast Asia	1990	2021	0.1536	0.0347	0.2726	1	2.5317	0.011352
Southern Latin America	1990	2021	0.6318	0.5097	0.7541	1	10.1683	0
Southern Sub-Saharan Africa	1990	2021	-0.9191	-1.2951	-0.5416	1	-4.759	2e-06
Spain	1990	2021	0.9936	0.8265	1.1611	1	11.6971	0
Sri Lanka	1990	2021	0.7838	0.5407	1.0276	1	6.3357	0
Sudan	1990	2021	0.6778	0.535	0.8207	1	9.3301	0
Suriname	1990	2021	0.1367	-0.0881	0.362	0	1.1914	0.233485
Sweden	1990	2021	0.1258	0.0631	0.1886	1	3.931	8.5e-05
Switzerland	1990	2021	0.4391	0.3662	0.5121	1	11.8292	0
Syrian Arab Republic	1990	2021	0.4839	-0.2075	1.1801	0	1.3703	0.170596
Taiwan (Province of China)	1990	2021	0.5698	0.5431	0.5965	1	43.7339	0
Tajikistan	1990	2021	0.054	-0.5562	0.668	0	0.1731	0.862577
Thailand	1990	2021	0.3886	0.2336	0.5439	1	4.9191	1e-06
Timor-Leste	1990	2021	0.7131	0.3366	1.091	1	3.7187	0.0002
Togo	1990	2021	-0.0091	-0.2023	0.1846	0	-0.0918	0.926859
Tokelau	1990	2021	0.3764	0.3164	0.4365	1	12.3095	0
Tonga	1990	2021	0.2847	0.1606	0.4089	1	4.4993	7e-06
Trinidad and Tobago	1990	2021	0.121	-0.1098	0.3523	0	1.0268	0.304515
Tropical Latin America	1990	2021	-0.2199	-0.2961	-0.1437	1	-5.6504	0
Tunisia	1990	2021	0.0421	-0.0254	0.1096	0	1.2221	0.221664
Turkey	1990	2021	0.6652	0.5362	0.7944	1	10.1347	0
Turkmenistan	1990	2021	-0.0246	-0.604	0.5583	0	-0.0828	0.933982
Tuvalu	1990	2021	1.0245	0.9027	1.1465	1	17.2522	0
Uganda	1990	2021	1.388	1.1303	1.6464	1	10.6154	0
Ukraine	1990	2021	-0.0346	-0.5396	0.4731	0	-0.1337	0.893606
United Arab Emirates	1990	2021	1.0118	0.5787	1.4468	1	4.5918	4e-06
United Kingdom	1990	2021	0.3634	0.2774	0.4495	1	8.2892	0
United Republic of Tanzania	1990	2021	0.5603	0.1896	0.9323	1	2.9655	0.003022
United States of America	1990	2021	0.4559	0.3312	0.5807	1	7.1777	0
United States Virgin Islands	1990	2021	0.3815	0.2728	0.4903	1	6.8877	0
Uruguay	1990	2021	0.4295	0.1727	0.6869	1	3.2812	0.001034
Uzbekistan	1990	2021	0.4026	-0.1377	0.9459	0	1.4595	0.14443
Vanuatu	1990	2021	0.2827	0.2347	0.3308	1	11.5502	0
Venezuela (Bolivarian Republic of)	1990	2021	-0.3013	-0.5128	-0.0892	1	-2.7835	0.005378
Viet Nam	1990	2021	0.572	0.5311	0.6128	1	27.5167	0
Western Europe	1990	2021	0.4636	0.3799	0.5474	1	10.8765	0
Western Sub-Saharan Africa	1990	2021	0.3843	0.3074	0.4614	1	9.8013	0
Yemen	1990	2021	0.4084	0.2806	0.5364	1	6.2711	0
Zambia	1990	2021	-0.0415	-0.2363	0.1536	0	-0.4173	0.676472
Zimbabwe	1990	2021	-1.6224	-1.9945	-1.2489	1	-8.4604	0

## Sheet: Supplementary Table 3
Supplementary Table 3. Changes in the lifetime risk of developing BPH by SDI over the years.
location name	year	risk	95%CI (low)	95%CI (upper)
Global	1990	24.05	24.02	24.07
Global	1991	23.88	23.85	23.91
Global	1992	23.71	23.69	23.74
Global	1993	23.46	23.43	23.48
Global	1994	23.13	23.11	23.16
Global	1995	23.35	23.33	23.38
Global	1996	23.59	23.56	23.61
Global	1997	23.83	23.8	23.85
Global	1998	23.98	23.95	24.01
Global	1999	24.11	24.08	24.14
Global	2000	24.22	24.19	24.24
Global	2001	24.4	24.37	24.43
Global	2002	24.57	24.54	24.6
Global	2003	24.73	24.7	24.76
Global	2004	24.92	24.89	24.95
Global	2005	25.2	25.17	25.22
Global	2006	25.68	25.65	25.71
Global	2007	26.04	26.01	26.07
Global	2008	26.27	26.24	26.3
Global	2009	26.68	26.65	26.71
Global	2010	26.89	26.86	26.92
Global	2011	27.2	27.17	27.22
Global	2012	27.52	27.49	27.55
Global	2013	27.83	27.8	27.86
Global	2014	28.1	28.07	28.13
Global	2015	28.33	28.3	28.36
Global	2016	28.58	28.56	28.61
Global	2017	28.9	28.87	28.93
Global	2018	29.14	29.11	29.17
Global	2019	29.38	29.35	29.4
Global	2020	28.08	28.05	28.1
Global	2021	27.29	27.26	27.31
High-middle SDI	1990	28.87	28.81	28.94
High-middle SDI	1991	28.56	28.49	28.62
High-middle SDI	1992	27.95	27.89	28.02
High-middle SDI	1993	27.07	27.01	27.13
High-middle SDI	1994	26.53	26.47	26.58
High-middle SDI	1995	26.6	26.54	26.65
High-middle SDI	1996	27.14	27.08	27.2
High-middle SDI	1997	27.71	27.65	27.77
High-middle SDI	1998	28.03	27.97	28.09
High-middle SDI	1999	27.75	27.69	27.81
High-middle SDI	2000	27.57	27.51	27.63
High-middle SDI	2001	27.63	27.57	27.69
High-middle SDI	2002	27.61	27.55	27.67
High-middle SDI	2003	27.61	27.55	27.67
High-middle SDI	2004	27.73	27.67	27.78
High-middle SDI	2005	27.76	27.7	27.81
High-middle SDI	2006	28.57	28.51	28.63
High-middle SDI	2007	29.12	29.06	29.19
High-middle SDI	2008	29.42	29.35	29.48
High-middle SDI	2009	29.97	29.91	30.03
High-middle SDI	2010	30.23	30.17	30.3
High-middle SDI	2011	30.71	30.65	30.78
High-middle SDI	2012	31.02	30.95	31.08
High-middle SDI	2013	31.37	31.3	31.44
High-middle SDI	2014	31.59	31.53	31.66
High-middle SDI	2015	31.89	31.82	31.96
High-middle SDI	2016	32.15	32.09	32.22
High-middle SDI	2017	32.57	32.5	32.63
High-middle SDI	2018	32.75	32.68	32.81
High-middle SDI	2019	32.94	32.87	33
High-middle SDI	2020	32.02	31.96	32.09
High-middle SDI	2021	31.51	31.45	31.57
High SDI	1990	22.04	21.97	22.11
High SDI	1991	21.79	21.72	21.86
High SDI	1992	21.62	21.55	21.69
High SDI	1993	21.41	21.34	21.48
High SDI	1994	21.32	21.25	21.39
High SDI	1995	21.34	21.27	21.41
High SDI	1996	21.53	21.46	21.6
High SDI	1997	21.67	21.6	21.74
High SDI	1998	21.69	21.62	21.77
High SDI	1999	21.72	21.65	21.79
High SDI	2000	21.88	21.8	21.95
High SDI	2001	22.07	22	22.15
High SDI	2002	22.32	22.25	22.4
High SDI	2003	22.59	22.51	22.66
High SDI	2004	22.95	22.87	23.02
High SDI	2005	23.18	23.1	23.25
High SDI	2006	23.49	23.42	23.57
High SDI	2007	23.86	23.78	23.93
High SDI	2008	24.22	24.14	24.3
High SDI	2009	24.56	24.48	24.64
High SDI	2010	24.8	24.72	24.88
High SDI	2011	24.91	24.83	24.98
High SDI	2012	25.02	24.94	25.1
High SDI	2013	25.08	25.01	25.16
High SDI	2014	25.17	25.09	25.25
High SDI	2015	25.18	25.1	25.26
High SDI	2016	25.28	25.2	25.36
High SDI	2017	25.51	25.43	25.59
High SDI	2018	25.75	25.68	25.83
High SDI	2019	25.93	25.85	26.01
High SDI	2020	24.99	24.92	25.07
High SDI	2021	24.71	24.64	24.78
Low-middle SDI	1990	22.74	22.68	22.8
Low-middle SDI	1991	22.84	22.79	22.9
Low-middle SDI	1992	23.08	23.02	23.14
Low-middle SDI	1993	23.22	23.16	23.28
Low-middle SDI	1994	23.4	23.34	23.46
Low-middle SDI	1995	23.42	23.37	23.48
Low-middle SDI	1996	23.56	23.5	23.62
Low-middle SDI	1997	23.61	23.55	23.66
Low-middle SDI	1998	23.7	23.65	23.76
Low-middle SDI	1999	24.09	24.03	24.15
Low-middle SDI	2000	24.33	24.27	24.38
Low-middle SDI	2001	24.49	24.43	24.55
Low-middle SDI	2002	24.76	24.7	24.81
Low-middle SDI	2003	25.02	24.96	25.08
Low-middle SDI	2004	25.32	25.26	25.38
Low-middle SDI	2005	25.55	25.49	25.61
Low-middle SDI	2006	25.83	25.77	25.89
Low-middle SDI	2007	25.96	25.9	26.02
Low-middle SDI	2008	26.01	25.95	26.07
Low-middle SDI	2009	26.43	26.37	26.49
Low-middle SDI	2010	26.63	26.57	26.69
Low-middle SDI	2011	26.86	26.8	26.92
Low-middle SDI	2012	27.23	27.18	27.29
Low-middle SDI	2013	27.66	27.6	27.72
Low-middle SDI	2014	28.01	27.95	28.07
Low-middle SDI	2015	28.26	28.2	28.32
Low-middle SDI	2016	28.53	28.48	28.59
Low-middle SDI	2017	28.77	28.71	28.83
Low-middle SDI	2018	28.94	28.89	29
Low-middle SDI	2019	29.19	29.13	29.24
Low-middle SDI	2020	27.13	27.08	27.18
Low-middle SDI	2021	26.05	26	26.09
Low SDI	1990	15.03	14.96	15.09
Low SDI	1991	15.19	15.13	15.25
Low SDI	1992	15.37	15.3	15.43
Low SDI	1993	15.43	15.37	15.49
Low SDI	1994	14.08	14.03	14.14
Low SDI	1995	15.43	15.37	15.49
Low SDI	1996	15.46	15.4	15.52
Low SDI	1997	15.54	15.48	15.6
Low SDI	1998	15.63	15.57	15.69
Low SDI	1999	15.93	15.87	15.99
Low SDI	2000	16.2	16.14	16.26
Low SDI	2001	16.62	16.56	16.68
Low SDI	2002	16.94	16.88	17
Low SDI	2003	17.28	17.21	17.34
Low SDI	2004	17.67	17.61	17.74
Low SDI	2005	18.15	18.08	18.22
Low SDI	2006	18.63	18.56	18.7
Low SDI	2007	18.97	18.9	19.04
Low SDI	2008	19.35	19.28	19.42
Low SDI	2009	19.65	19.57	19.72
Low SDI	2010	19.57	19.5	19.64
Low SDI	2011	19.9	19.83	19.97
Low SDI	2012	20.52	20.45	20.59
Low SDI	2013	20.88	20.8	20.95
Low SDI	2014	21.17	21.1	21.25
Low SDI	2015	21.44	21.36	21.51
Low SDI	2016	21.82	21.75	21.9
Low SDI	2017	22.18	22.1	22.26
Low SDI	2018	22.48	22.41	22.56
Low SDI	2019	22.79	22.71	22.86
Low SDI	2020	20.78	20.72	20.85
Low SDI	2021	19.46	19.4	19.51
Middle SDI	1990	27.64	27.58	27.7
Middle SDI	1991	27.31	27.25	27.36
Middle SDI	1992	26.99	26.94	27.05
Middle SDI	1993	26.76	26.7	26.82
Middle SDI	1994	26.69	26.63	26.74
Middle SDI	1995	26.7	26.65	26.76
Middle SDI	1996	26.91	26.86	26.97
Middle SDI	1997	27.19	27.14	27.25
Middle SDI	1998	27.4	27.34	27.46
Middle SDI	1999	27.68	27.62	27.73
Middle SDI	2000	27.78	27.72	27.83
Middle SDI	2001	27.94	27.89	28
Middle SDI	2002	28.07	28.02	28.13
Middle SDI	2003	28.13	28.07	28.18
Middle SDI	2004	28.12	28.07	28.17
Middle SDI	2005	28.58	28.53	28.64
Middle SDI	2006	29.09	29.03	29.14
Middle SDI	2007	29.47	29.42	29.53
Middle SDI	2008	29.61	29.55	29.66
Middle SDI	2009	29.95	29.9	30
Middle SDI	2010	30.24	30.18	30.29
Middle SDI	2011	30.57	30.51	30.62
Middle SDI	2012	30.84	30.79	30.9
Middle SDI	2013	31.16	31.1	31.21
Middle SDI	2014	31.44	31.39	31.5
Middle SDI	2015	31.71	31.66	31.77
Middle SDI	2016	31.93	31.88	31.98
Middle SDI	2017	32.23	32.17	32.28
Middle SDI	2018	32.5	32.45	32.55
Middle SDI	2019	32.71	32.66	32.76
Middle SDI	2020	31.55	31.51	31.6
Middle SDI	2021	30.61	30.56	30.65

## Sheet: Supplementary Table 4
Supplementary Table 4. Trends in the Concentration Index of BPH Lifetime Risk.
year	concentration index	95%CI (low)	95%CI (upper)
1990	0.249593	0.17618	0.323006
1991	0.247587	0.174911	0.320262
1992	0.244698	0.172886	0.31651
1993	0.238795	0.167731	0.309859
1994	0.230144	0.158884	0.301404
1995	0.236627	0.165507	0.307748
1996	0.239566	0.167377	0.311754
1997	0.240029	0.167293	0.312764
1998	0.244737	0.170655	0.31882
1999	0.241685	0.166706	0.316664
2000	0.24027	0.164604	0.315937
2001	0.237602	0.162357	0.312847
2002	0.237184	0.162362	0.312007
2003	0.233089	0.160308	0.30587
2004	0.229737	0.159221	0.300253
2005	0.224855	0.155624	0.294087
2006	0.223172	0.154909	0.291434
2007	0.223174	0.155612	0.290736
2008	0.22392	0.157444	0.290396
2009	0.226412	0.160367	0.292457
2010	0.233072	0.165575	0.300568
2011	0.219419	0.154453	0.284385
2012	0.234071	0.165184	0.302957
2013	0.232	0.16318	0.300819
2014	0.228264	0.159835	0.296694
2015	0.22588	0.157806	0.293953
2016	0.225751	0.157034	0.294467
2017	0.223463	0.155828	0.291097
2018	0.224293	0.156712	0.291875
2019	0.223112	0.155377	0.290846
2020	0.230923	0.16413	0.297717
2021	0.23661	0.171127	0.302094

## Sheet: Supplementary Table 5
Supplementary Table 5. Lifetime Risk of developing BPH in Countries with Different SDI Levels.
location name	SDI (mean value)	risk	rank
Cambodia	0.473621	30.35	Southeast Asia
Canada	0.873171	25.23	High-income North America
United States of America	0.862448	22.32	High-income North America
Antigua and Barbuda	0.749887	32.76	Caribbean
Bahamas	0.805021	25.32	Caribbean
Barbados	0.746749	33.91	Caribbean
Belize	0.610229	29.9	Caribbean
Cuba	0.66873	29.69	Caribbean
Indonesia	0.656868	31.16	Southeast Asia
Dominica	0.746967	27.94	Caribbean
Dominican Republic	0.619388	29.75	Caribbean
Grenada	0.668993	26.76	Caribbean
Guyana	0.650812	20.44	Caribbean
Haiti	0.448278	19.98	Caribbean
Jamaica	0.683263	31.59	Caribbean
Saint Lucia	0.67251	30.3	Caribbean
Saint Vincent and the Grenadines	0.637196	29.94	Caribbean
Suriname	0.633666	27.32	Caribbean
Trinidad and Tobago	0.768763	27.62	Caribbean
Lao People's Democratic Republic	0.489136	31.25	Southeast Asia
Bolivia (Plurinational State of)	0.599011	21.98	Andean Latin America
Ecuador	0.661017	29.46	Andean Latin America
Peru	0.662054	26.58	Andean Latin America
Colombia	0.655443	40.91	Central Latin America
Costa Rica	0.70034	41.81	Central Latin America
El Salvador	0.563775	34.62	Central Latin America
Guatemala	0.539972	33.92	Central Latin America
Honduras	0.513037	33.25	Central Latin America
Malaysia	0.742524	35.4	Southeast Asia
Mexico	0.664575	35.61	Central Latin America
Nicaragua	0.523958	37.35	Central Latin America
Panama	0.708865	43.88	Central Latin America
Venezuela (Bolivarian Republic of)	0.596513	32.9	Central Latin America
Brazil	0.653044	19.83	Tropical Latin America
Paraguay	0.635718	22.38	Tropical Latin America
Algeria	0.659501	23.75	North Africa and Middle East
Maldives	0.650887	45.07	Southeast Asia
Bahrain	0.753043	24.89	North Africa and Middle East
Egypt	0.606787	18.46	North Africa and Middle East
Iran (Islamic Republic of)	0.697207	24.01	North Africa and Middle East
Iraq	0.662626	19.85	North Africa and Middle East
Jordan	0.725307	27.14	North Africa and Middle East
Kuwait	0.846651	28.42	North Africa and Middle East
Lebanon	0.744746	23.3	North Africa and Middle East
Libya	0.725771	21.36	North Africa and Middle East
Morocco	0.562698	22.4	North Africa and Middle East
Palestine	0.631012	23.02	North Africa and Middle East
Myanmar	0.533901	29.53	Southeast Asia
Oman	0.773392	21.98	North Africa and Middle East
Qatar	0.846861	28.5	North Africa and Middle East
Saudi Arabia	0.815143	23.18	North Africa and Middle East
Syrian Arab Republic	0.623004	21.69	North Africa and Middle East
Tunisia	0.682432	22.35	North Africa and Middle East
Turkey	0.712693	22.95	North Africa and Middle East
United Arab Emirates	0.849318	28.62	North Africa and Middle East
Yemen	0.450376	16.55	North Africa and Middle East
Philippines	0.651219	30.36	Southeast Asia
Afghanistan	0.3372	12.5	North Africa and Middle East
Bangladesh	0.492421	28.24	South Asia
Bhutan	0.473062	30.48	South Asia
India	0.575402	30.27	South Asia
Nepal	0.433175	20.31	South Asia
Pakistan	0.504029	24.1	South Asia
Angola	0.453722	13.52	Central Sub-Saharan Africa
Central African Republic	0.309168	7.89	Central Sub-Saharan Africa
Sri Lanka	0.701535	39.85	Southeast Asia
Congo	0.583075	14.85	Central Sub-Saharan Africa
Democratic Republic of the Congo	0.38318	14.07	Central Sub-Saharan Africa
Equatorial Guinea	0.657857	14.19	Central Sub-Saharan Africa
Gabon	0.634691	14.86	Central Sub-Saharan Africa
Burundi	0.289374	16.08	Eastern Sub-Saharan Africa
Comoros	0.475979	19.49	Eastern Sub-Saharan Africa
Djibouti	0.487958	16.99	Eastern Sub-Saharan Africa
Eritrea	0.403864	14.26	Eastern Sub-Saharan Africa
Ethiopia	0.358823	18.39	Eastern Sub-Saharan Africa
Thailand	0.682548	37.57	Southeast Asia
Kenya	0.523768	19.06	Eastern Sub-Saharan Africa
Madagascar	0.400247	16.14	Eastern Sub-Saharan Africa
Malawi	0.384554	11.83	Eastern Sub-Saharan Africa
Mauritius	0.71826	36.09	Southeast Asia
Mozambique	0.326463	10.55	Eastern Sub-Saharan Africa
Rwanda	0.435589	16.89	Eastern Sub-Saharan Africa
Seychelles	0.730151	37.24	Southeast Asia
Somalia	0.0776881	9.15	Eastern Sub-Saharan Africa
United Republic of Tanzania	0.446568	16.68	Eastern Sub-Saharan Africa
Timor-Leste	0.444668	32.68	Southeast Asia
Uganda	0.423261	14.28	Eastern Sub-Saharan Africa
Zambia	0.505949	11.55	Eastern Sub-Saharan Africa
Botswana	0.642722	17.18	Southern Sub-Saharan Africa
Lesotho	0.510393	6.7	Southern Sub-Saharan Africa
Namibia	0.617565	14.42	Southern Sub-Saharan Africa
South Africa	0.679627	17.24	Southern Sub-Saharan Africa
Eswatini	0.58546	8.6	Southern Sub-Saharan Africa
Zimbabwe	0.473819	11.25	Southern Sub-Saharan Africa
Viet Nam	0.627934	38.49	Southeast Asia
Benin	0.373487	15.77	Western Sub-Saharan Africa
Burkina Faso	0.285118	14.14	Western Sub-Saharan Africa
Cameroon	0.479691	13.92	Western Sub-Saharan Africa
Cabo Verde	0.533535	20.75	Western Sub-Saharan Africa
Chad	0.240436	14.06	Western Sub-Saharan Africa
C么te d'Ivoire	0.425942	15.64	Western Sub-Saharan Africa
Gambia	0.409714	14.99	Western Sub-Saharan Africa
Ghana	0.56493	15.73	Western Sub-Saharan Africa
Guinea	0.336401	14.49	Western Sub-Saharan Africa
Guinea-Bissau	0.35311	11.23	Western Sub-Saharan Africa
Liberia	0.352442	16.67	Western Sub-Saharan Africa
Mali	0.26858	14.19	Western Sub-Saharan Africa
Mauritania	0.498945	20.7	Western Sub-Saharan Africa
Niger	0.168073	15.9	Western Sub-Saharan Africa
Nigeria	0.503391	17.81	Western Sub-Saharan Africa
Sao Tome and Principe	0.505414	20.36	Western Sub-Saharan Africa
Senegal	0.408054	17.41	Western Sub-Saharan Africa
Sierra Leone	0.358666	15.6	Western Sub-Saharan Africa
Togo	0.408534	14.88	Western Sub-Saharan Africa
Fiji	0.675052	25.62	Oceania
Kiribati	0.527187	23.66	Oceania
Marshall Islands	0.574091	26.72	Oceania
Micronesia (Federated States of)	0.587535	26.79	Oceania
Papua New Guinea	0.417797	24.83	Oceania
Samoa	0.593393	33.33	Oceania
Solomon Islands	0.42936	25.71	Oceania
Tonga	0.62635	34.35	Oceania
American Samoa	0.723728	34.4	Oceania
Vanuatu	0.473101	24.11	Oceania
Bermuda	0.821365	34.29	Caribbean
Cook Islands	0.77911	37.21	Oceania
Armenia	0.701833	28.21	Central Asia
Azerbaijan	0.694851	24.78	Central Asia
Greenland	0.82621	19.79	High-income North America
Georgia	0.732474	26.71	Central Asia
Guam	0.803982	36.35	Oceania
Kazakhstan	0.725144	21.94	Central Asia
Monaco	0.908263	19.87	Western Europe
Nauru	0.625178	19.91	Oceania
Kyrgyzstan	0.603979	22.92	Central Asia
Niue	0.726222	30.68	Oceania
Northern Mariana Islands	0.771535	32.41	Oceania
Mongolia	0.617622	22.09	Central Asia
Palau	0.754047	31.28	Oceania
Puerto Rico	0.825526	35.24	Caribbean
Tajikistan	0.541511	25.03	Central Asia
Saint Kitts and Nevis	0.754987	28.21	Caribbean
San Marino	0.888005	22.92	Western Europe
Turkmenistan	0.682161	21.74	Central Asia
Uzbekistan	0.662622	27.63	Central Asia
Tokelau	0.686426	33.58	Oceania
Tuvalu	0.576621	28.75	Oceania
United States Virgin Islands	0.821831	31.65	Caribbean
Albania	0.70685	33.99	Central Europe
South Sudan	0.278371	12.2	Eastern Sub-Saharan Africa
Bosnia and Herzegovina	0.723078	32.43	Central Europe
Bulgaria	0.768151	24.59	Central Europe
Croatia	0.798341	33.77	Central Europe
Czechia	0.82845	40.21	Central Europe
Hungary	0.790755	29.66	Central Europe
North Macedonia	0.75063	28.59	Central Europe
Montenegro	0.795801	29.12	Central Europe
Poland	0.812043	27.17	Central Europe
Romania	0.768454	32.11	Central Europe
Sudan	0.54195	19.52	North Africa and Middle East
Serbia	0.792416	33.7	Central Europe
Slovakia	0.810611	32.97	Central Europe
Slovenia	0.842431	31.34	Central Europe
Belarus	0.784485	35.98	Eastern Europe
Estonia	0.844918	45.6	Eastern Europe
Latvia	0.830664	39.42	Eastern Europe
China	0.72163	31.38	East Asia
Lithuania	0.856484	43.46	Eastern Europe
Republic of Moldova	0.732215	39.19	Eastern Europe
Russian Federation	0.808536	37.13	Eastern Europe
Ukraine	0.760774	38.57	Eastern Europe
Brunei Darussalam	0.810234	15.28	High-income Asia Pacific
Japan	0.871242	18.26	High-income Asia Pacific
Republic of Korea	0.886675	16.21	High-income Asia Pacific
Singapore	0.856098	17.18	High-income Asia Pacific
Democratic People's Republic of Korea	0.569855	31.99	East Asia
Australia	0.844253	28.7	Australasia
New Zealand	0.849442	30.58	Australasia
Andorra	0.869444	21.74	Western Europe
Austria	0.853837	42.93	Western Europe
Belgium	0.853654	40.34	Western Europe
Cyprus	0.835631	21.66	Western Europe
Denmark	0.896424	22.71	Western Europe
Finland	0.859831	40.88	Western Europe
Taiwan (Province of China)	0.874747	45.45	East Asia
France	0.838365	21.05	Western Europe
Germany	0.902957	21.45	Western Europe
Greece	0.791854	21.67	Western Europe
Iceland	0.876362	22.34	Western Europe
Ireland	0.873754	22.1	Western Europe
Israel	0.809012	22.27	Western Europe
Italy	0.805774	33.32	Western Europe
Luxembourg	0.884429	23.59	Western Europe
Malta	0.801585	28.24	Western Europe
Netherlands	0.888464	21.77	Western Europe
Norway	0.916133	49.02	Western Europe
Portugal	0.744152	21.2	Western Europe
Spain	0.769284	20.77	Western Europe
Sweden	0.88688	27.03	Western Europe
Switzerland	0.933059	46.92	Western Europe
United Kingdom	0.859	27.2	Western Europe
Argentina	0.723123	15.77	Southern Latin America
Chile	0.771515	20.48	Southern Latin America
Uruguay	0.719283	15.02	Southern Latin America

## Sheet: Supplementary Table 6
Supplementary Table 6. Frontier analysis of BPH lifetime risk in 2021: Regional disparities, SDI correlation, and trend patterns.
location name	year	risk	SDI	frontier	intercept
Somalia	2021	9.15	0.0776881	9.04555	0.104452
Lesotho	2021	6.7	0.510393	5.42015	1.27985
Central African Republic	2021	7.89	0.309168	6.05023	1.83977
Eswatini	2021	8.6	0.58546	5.42089	3.17911
Mozambique	2021	10.55	0.326463	6.05006	4.49994
Guinea-Bissau	2021	11.23	0.35311	6.05014	5.17986
Zimbabwe	2021	11.25	0.473819	5.70446	5.54554
Malawi	2021	11.83	0.384554	6.05046	5.77954
Zambia	2021	11.55	0.505949	5.4232	6.1268
South Sudan	2021	12.2	0.278371	6.0502	6.1498
Afghanistan	2021	12.5	0.3372	6.05078	6.44922
Niger	2021	15.9	0.168073	8.75938	7.14062
Angola	2021	13.52	0.453722	5.82063	7.69937
Chad	2021	14.06	0.240436	6.05438	8.00562
Democratic Republic of the Congo	2021	14.07	0.38318	6.05009	8.01991
Burkina Faso	2021	14.14	0.285118	6.05343	8.08657
Cameroon	2021	13.92	0.479691	5.80361	8.11639
Mali	2021	14.19	0.26858	6.05053	8.13947
Eritrea	2021	14.26	0.403864	6.07068	8.18932
Uganda	2021	14.28	0.423261	6.0244	8.2556
Guinea	2021	14.49	0.336401	6.05509	8.43491
Equatorial Guinea	2021	14.19	0.657857	5.42173	8.76827
Togo	2021	14.88	0.408534	6.05114	8.82886
Gambia	2021	14.99	0.409714	6.05011	8.93989
Namibia	2021	14.42	0.617565	5.42376	8.99624
Congo	2021	14.85	0.583075	5.42074	9.42926
Gabon	2021	14.86	0.634691	5.42021	9.43979
Sierra Leone	2021	15.6	0.358666	6.05516	9.54484
Uruguay	2021	15.02	0.719283	5.42004	9.59996
Côte d'Ivoire	2021	15.64	0.425942	5.98146	9.65854
Benin	2021	15.77	0.373487	6.05204	9.71796
Brunei Darussalam	2021	15.28	0.810234	5.425	9.855
Burundi	2021	16.08	0.289374	6.05006	10.0299
Madagascar	2021	16.14	0.400247	6.05013	10.0899
Ghana	2021	15.73	0.56493	5.42013	10.3099
Argentina	2021	15.77	0.723123	5.42006	10.3499
Liberia	2021	16.67	0.352442	6.05039	10.6196
Republic of Korea	2021	16.21	0.886675	5.42505	10.7849
United Republic of Tanzania	2021	16.68	0.446568	5.87942	10.8006
Yemen	2021	16.55	0.450376	5.56326	10.9867
Rwanda	2021	16.89	0.435589	5.78085	11.1091
Senegal	2021	17.41	0.408054	6.05009	11.3599
Djibouti	2021	16.99	0.487958	5.5696	11.4204
Botswana	2021	17.18	0.642722	5.42066	11.7593
Singapore	2021	17.18	0.856098	5.4201	11.7599
South Africa	2021	17.24	0.679627	5.42021	11.8198
Ethiopia	2021	18.39	0.358823	6.05313	12.3369
Nigeria	2021	17.81	0.503391	5.42152	12.3885
Japan	2021	18.26	0.871242	5.43012	12.8299
Egypt	2021	18.46	0.606787	5.43338	13.0266
Kenya	2021	19.06	0.523768	5.42	13.64
Comoros	2021	19.49	0.475979	5.61177	13.8782
Sudan	2021	19.52	0.54195	5.42002	14.1
Greenland	2021	19.79	0.82621	5.4276	14.3624
Haiti	2021	19.98	0.448278	5.59803	14.382
Brazil	2021	19.83	0.653044	5.4267	14.4033
Iraq	2021	19.85	0.662626	5.42074	14.4293
Monaco	2021	19.87	0.908263	5.42	14.45
Nauru	2021	19.91	0.625178	5.42008	14.4899
Nepal	2021	20.31	0.433175	5.60159	14.7084
Sao Tome and Principe	2021	20.36	0.505414	5.43092	14.9291
Guyana	2021	20.44	0.650812	5.42036	15.0196
Chile	2021	20.48	0.771515	5.4207	15.0593
Mauritania	2021	20.7	0.498945	5.42156	15.2784
Cabo Verde	2021	20.75	0.533535	5.42055	15.3295
Spain	2021	20.77	0.769284	5.42303	15.347
France	2021	21.05	0.838365	5.42002	15.63
Portugal	2021	21.2	0.744152	5.42007	15.7799
Libya	2021	21.36	0.725771	5.435	15.925
Germany	2021	21.45	0.902957	5.42807	16.0219
Cyprus	2021	21.66	0.835631	5.43005	16.23
Greece	2021	21.67	0.791854	5.42007	16.2499
Syrian Arab Republic	2021	21.69	0.623004	5.42128	16.2687
Turkmenistan	2021	21.74	0.682161	5.4228	16.3172
Andorra	2021	21.74	0.869444	5.4201	16.3199
Netherlands	2021	21.77	0.888464	5.42978	16.3402
Kazakhstan	2021	21.94	0.725144	5.43336	16.5066
Oman	2021	21.98	0.773392	5.43675	16.5432
Bolivia (Plurinational State of)	2021	21.98	0.599011	5.42095	16.5591
Ireland	2021	22.1	0.873754	5.43097	16.669
Mongolia	2021	22.09	0.617622	5.42071	16.6693
Israel	2021	22.27	0.809012	5.43254	16.8375
United States of America	2021	22.32	0.862448	5.43021	16.8898
Iceland	2021	22.34	0.876362	5.42386	16.9161
Tunisia	2021	22.35	0.682432	5.42092	16.9291
Paraguay	2021	22.38	0.635718	5.43126	16.9487
Morocco	2021	22.4	0.562698	5.42167	16.9783
Denmark	2021	22.71	0.896424	5.42523	17.2848
San Marino	2021	22.92	0.888005	5.42169	17.4983
Kyrgyzstan	2021	22.92	0.603979	5.42014	17.4999
Türkiye	2021	22.95	0.712693	5.43006	17.5199
Palestine	2021	23.02	0.631012	5.42002	17.6
Saudi Arabia	2021	23.18	0.815143	5.42132	17.7587
Lebanon	2021	23.3	0.744746	5.4201	17.8799
Luxembourg	2021	23.59	0.884429	5.42059	18.1694
Kiribati	2021	23.66	0.527187	5.42306	18.2369
Algeria	2021	23.75	0.659501	5.43872	18.3113
Vanuatu	2021	24.11	0.473101	5.74979	18.3602
Iran (Islamic Republic of)	2021	24.01	0.697207	5.42145	18.5886
Pakistan	2021	24.1	0.504029	5.4256	18.6744
Papua New Guinea	2021	24.83	0.417797	6.05014	18.7799
Bulgaria	2021	24.59	0.768151	5.42181	19.1682
Azerbaijan	2021	24.78	0.694851	5.42001	19.36
Bahrain	2021	24.89	0.753043	5.42702	19.463
Tajikistan	2021	25.03	0.541511	5.42564	19.6044
Canada	2021	25.23	0.873171	5.43367	19.7963
Bahamas	2021	25.32	0.805021	5.42521	19.8948
Solomon Islands	2021	25.71	0.42936	5.62876	20.0812
Fiji	2021	25.62	0.675052	5.42103	20.199
Peru	2021	26.58	0.662054	5.42103	21.159
Georgia	2021	26.71	0.732474	5.43011	21.2799
Marshall Islands	2021	26.72	0.574091	5.42145	21.2986
Grenada	2021	26.76	0.668993	5.42323	21.3368
Micronesia (Federated States of)	2021	26.79	0.587535	5.4331	21.3569
Sweden	2021	27.03	0.88688	5.42123	21.6088
Jordan	2021	27.14	0.725307	5.42193	21.7181
Poland	2021	27.17	0.812043	5.4203	21.7497
United Kingdom	2021	27.2	0.859	5.4212	21.7788
Suriname	2021	27.32	0.633666	5.42454	21.8955
Trinidad and Tobago	2021	27.62	0.768763	5.43016	22.1898
Uzbekistan	2021	27.63	0.662622	5.42572	22.2043
Dominica	2021	27.94	0.746967	5.42362	22.5164
Bangladesh	2021	28.24	0.492421	5.56318	22.6768
Saint Kitts and Nevis	2021	28.21	0.754987	5.42063	22.7894
Armenia	2021	28.21	0.701833	5.42048	22.7895
Malta	2021	28.24	0.801585	5.43134	22.8087
Kuwait	2021	28.42	0.846651	5.4204	22.9996
Qatar	2021	28.5	0.846861	5.4228	23.0772
North Macedonia	2021	28.59	0.75063	5.43334	23.1567
United Arab Emirates	2021	28.62	0.849318	5.42013	23.1999
Australia	2021	28.7	0.844253	5.4202	23.2798
Tuvalu	2021	28.75	0.576621	5.4201	23.3299
Montenegro	2021	29.12	0.795801	5.42	23.7
Ecuador	2021	29.46	0.661017	5.42445	24.0355
Myanmar	2021	29.53	0.533901	5.42	24.11
Hungary	2021	29.66	0.790755	5.43337	24.2266
Cuba	2021	29.69	0.66873	5.42503	24.265
Dominican Republic	2021	29.75	0.619388	5.42024	24.3298
Belize	2021	29.9	0.610229	5.42167	24.4783
Saint Vincent and the Grenadines	2021	29.94	0.637196	5.42597	24.514
Cambodia	2021	30.35	0.473621	5.59576	24.7542
Bhutan	2021	30.48	0.473062	5.64426	24.8357
India	2021	30.27	0.575402	5.4203	24.8497
Saint Lucia	2021	30.3	0.67251	5.42082	24.8792
Philippines	2021	30.36	0.651219	5.43	24.93
New Zealand	2021	30.58	0.849442	5.42188	25.1581
Niue	2021	30.68	0.726222	5.42535	25.2547
Lao People's Democratic Republic	2021	31.25	0.489136	5.63306	25.6169
Indonesia	2021	31.16	0.656868	5.42005	25.74
Palau	2021	31.28	0.754047	5.42032	25.8597
Slovenia	2021	31.34	0.842431	5.42148	25.9185
China	2021	31.38	0.72163	5.42251	25.9575
Jamaica	2021	31.59	0.683263	5.42001	26.17
United States Virgin Islands	2021	31.65	0.821831	5.43136	26.2186
Democratic People's Republic of Korea	2021	31.99	0.569855	5.42064	26.5694
Romania	2021	32.11	0.768454	5.42016	26.6898
Northern Mariana Islands	2021	32.41	0.771535	5.42516	26.9848
Bosnia and Herzegovina	2021	32.43	0.723078	5.43052	26.9995
Timor-Leste	2021	32.68	0.444668	5.56194	27.1181
Antigua and Barbuda	2021	32.76	0.749887	5.42618	27.3338
Venezuela (Bolivarian Republic of)	2021	32.9	0.596513	5.42068	27.4793
Slovakia	2021	32.97	0.810611	5.42002	27.55
Honduras	2021	33.25	0.513037	5.42484	27.8252
Italy	2021	33.32	0.805774	5.42191	27.8981
Samoa	2021	33.33	0.593393	5.42297	27.907
Tokelau	2021	33.58	0.686426	5.42001	28.16
Serbia	2021	33.7	0.792416	5.42034	28.2797
Croatia	2021	33.77	0.798341	5.42764	28.3424
Barbados	2021	33.91	0.746749	5.42064	28.4894
Guatemala	2021	33.92	0.539972	5.42266	28.4973
Albania	2021	33.99	0.70685	5.42017	28.5698
Bermuda	2021	34.29	0.821365	5.42005	28.8699
Tonga	2021	34.35	0.62635	5.42693	28.9231
American Samoa	2021	34.4	0.723728	5.42008	28.9799
El Salvador	2021	34.62	0.563775	5.43334	29.1867
Puerto Rico	2021	35.24	0.825526	5.43508	29.8049
Malaysia	2021	35.4	0.742524	5.42136	29.9786
Mexico	2021	35.61	0.664575	5.43006	30.1799
Belarus	2021	35.98	0.784485	5.43023	30.5498
Mauritius	2021	36.09	0.71826	5.43337	30.6566
Guam	2021	36.35	0.803982	5.42139	30.9286
Russian Federation	2021	37.13	0.808536	5.42027	31.7097
Cook Islands	2021	37.21	0.77911	5.42032	31.7897
Seychelles	2021	37.24	0.730151	5.4207	31.8193
Nicaragua	2021	37.35	0.523958	5.42793	31.9221
Thailand	2021	37.57	0.682548	5.42061	32.1494
Viet Nam	2021	38.49	0.627934	5.4337	33.0563
Ukraine	2021	38.57	0.760774	5.43263	33.1374
Republic of Moldova	2021	39.19	0.732215	5.42032	33.7697
Latvia	2021	39.42	0.830664	5.42006	33.9999
Sri Lanka	2021	39.85	0.701535	5.42573	34.4243
Czechia	2021	40.21	0.82845	5.42028	34.7897
Belgium	2021	40.34	0.853654	5.42208	34.9179
Finland	2021	40.88	0.859831	5.4203	35.4597
Colombia	2021	40.91	0.655443	5.42505	35.485
Costa Rica	2021	41.81	0.70034	5.42039	36.3896
Austria	2021	42.93	0.853837	5.42	37.51
Lithuania	2021	43.46	0.856484	5.42293	38.0371
Panama	2021	43.88	0.708865	5.42089	38.4591
Maldives	2021	45.07	0.650887	5.42519	39.6448
Taiwan (Province of China)	2021	45.45	0.874747	5.42016	40.0298
Estonia	2021	45.6	0.844918	5.4225	40.1775
Switzerland	2021	46.92	0.933059	5.42003	41.5
Norway	2021	49.02	0.916133	5.42	43.6

## Sheet: Supplementary Table 7
Supplementary Table 7. Frontier analysis of BPH lifetime risk from 1990 to 2021
location name	year	risk	SDI	frontier	intercept
Afghanistan	1990	12.03	0.173832	8.99308	3.03692
Afghanistan	1991	11.82	0.176473	9.12992	2.69008
Afghanistan	1992	12.03	0.179634	8.76278	3.26722
Afghanistan	1993	12.23	0.180184	8.76503	3.46497
Afghanistan	1994	11.84	0.178519	8.72215	3.11785
Afghanistan	1995	12.17	0.178279	9.13564	3.03436
Afghanistan	1996	12.35	0.178085	8.8929	3.4571
Afghanistan	1997	12.11	0.177884	8.96056	3.14944
Afghanistan	1998	11.46	0.177513	9.12239	2.33761
Afghanistan	1999	12.29	0.177075	9.15838	3.13162
Afghanistan	2000	12.22	0.177026	8.77977	3.44023
Afghanistan	2001	12.18	0.177773	9.04849	3.13151
Afghanistan	2002	12.72	0.183808	8.91475	3.80525
Afghanistan	2003	13.38	0.190519	9.11838	4.26162
Afghanistan	2004	13.73	0.196904	8.822	4.908
Afghanistan	2005	13.94	0.203928	8.63127	5.30873
Afghanistan	2006	14.06	0.211074	8.59494	5.46506
Afghanistan	2007	14.27	0.219628	7.15253	7.11747
Afghanistan	2008	14.69	0.228089	6.79032	7.89968
Afghanistan	2009	15.08	0.237901	6.1011	8.9789
Afghanistan	2010	15.38	0.24776	6.05024	9.32976
Afghanistan	2011	15.74	0.257042	6.05589	9.68411
Afghanistan	2012	15.96	0.266484	6.05703	9.90297
Afghanistan	2013	16.31	0.275637	6.06271	10.2473
Afghanistan	2014	16.2	0.28403	6.05255	10.1474
Afghanistan	2015	16.01	0.29185	6.06335	9.94665
Afghanistan	2016	16	0.299631	6.05071	9.94929
Afghanistan	2017	16.37	0.307425	6.05002	10.32
Afghanistan	2018	15.98	0.314866	6.05512	9.92488
Afghanistan	2019	16.61	0.322454	6.08511	10.5249
Afghanistan	2020	13.53	0.32983	6.05046	7.47954
Somalia	2021	9.15	0.0776881	9.04555	0.104452
Albania	1990	30.18	0.557773	5.42087	24.7591
Albania	1991	30.58	0.555629	5.42089	25.1591
Albania	1992	31.8	0.553108	5.42005	26.3799
Albania	1993	32.81	0.552453	5.4224	27.3876
Albania	1994	34.11	0.553764	5.42672	28.6833
Albania	1995	34.15	0.557041	5.4204	28.7296
Albania	1996	33.58	0.562249	5.42684	28.1532
Albania	1997	31.52	0.566803	5.42089	26.0991
Albania	1998	33.8	0.572534	5.42148	28.3785
Albania	1999	34.44	0.578295	5.42035	29.0197
Albania	2000	34.77	0.584664	5.42271	29.3473
Albania	2001	35.19	0.592413	5.43973	29.7503
Albania	2002	35.16	0.599866	5.42062	29.7394
Albania	2003	34.99	0.606971	5.42368	29.5663
Albania	2004	35.01	0.613864	5.43014	29.5799
Albania	2005	35.41	0.62068	5.42001	29.99
Albania	2006	36.02	0.627486	5.42044	30.5996
Albania	2007	36.73	0.634168	5.42578	31.3042
Albania	2008	36.92	0.640766	5.42019	31.4998
Albania	2009	37.33	0.646816	5.42071	31.9093
Albania	2010	37.25	0.652654	5.43098	31.819
Albania	2011	37.04	0.658197	5.4351	31.6049
Albania	2012	37.07	0.663557	5.42944	31.6406
Albania	2013	37.21	0.66874	5.42155	31.7885
Albania	2014	37.3	0.674113	5.42199	31.878
Albania	2015	37.39	0.679669	5.42042	31.9696
Albania	2016	37.42	0.685037	5.42262	31.9974
Albania	2017	37.44	0.690379	5.42023	32.0198
Albania	2018	37.55	0.695567	5.43127	32.1187
Albania	2019	37.53	0.700288	5.42031	32.1097
Albania	2020	35.14	0.70379	5.42129	29.7187
Lesotho	2021	6.7	0.510393	5.42015	1.27985
Algeria	1990	22.07	0.460487	5.83112	16.2389
Algeria	1991	22.23	0.468319	5.62358	16.6064
Algeria	1992	22.44	0.475951	5.89225	16.5477
Algeria	1993	22.64	0.483256	5.57021	17.0698
Algeria	1994	22.74	0.490451	5.59335	17.1466
Algeria	1995	22.88	0.497958	5.48677	17.3932
Algeria	1996	23.23	0.505991	5.43054	17.7995
Algeria	1997	23.19	0.514057	5.42001	17.77
Algeria	1998	23.48	0.522382	5.42766	18.0523
Algeria	1999	23.8	0.530786	5.42732	18.3727
Algeria	2000	23.9	0.539482	5.42084	18.4792
Algeria	2001	24.11	0.547529	5.43334	18.6767
Algeria	2002	24.29	0.555172	5.42191	18.8681
Algeria	2003	24.36	0.562537	5.42001	18.94
Algeria	2004	24.65	0.569353	5.43256	19.2174
Algeria	2005	24.87	0.576002	5.42272	19.4473
Algeria	2006	25.08	0.582126	5.42482	19.6552
Algeria	2007	25.31	0.587791	5.42007	19.8899
Algeria	2008	25.57	0.593191	5.43198	20.138
Algeria	2009	25.8	0.59787	5.43505	20.365
Algeria	2010	26.06	0.602824	5.42006	20.6399
Algeria	2011	26.22	0.607826	5.42321	20.7968
Algeria	2012	26.38	0.612704	5.42002	20.96
Algeria	2013	26.54	0.617422	5.4334	21.1066
Algeria	2014	26.7	0.622087	5.42096	21.279
Algeria	2015	26.83	0.626746	5.42449	21.4055
Algeria	2016	27.01	0.631711	5.42124	21.5888
Algeria	2017	27.18	0.636973	5.43522	21.7448
Algeria	2018	27.37	0.6425	5.42284	21.9472
Algeria	2019	27.54	0.648211	5.42034	22.1197
Algeria	2020	24.86	0.653651	5.42002	19.44
Central African Republic	2021	7.89	0.309168	6.05023	1.83977
American Samoa	1990	30.68	0.613634	5.4209	25.2591
American Samoa	1991	30.69	0.615848	5.42257	25.2674
American Samoa	1992	30.78	0.618584	5.42003	25.36
American Samoa	1993	30.92	0.622079	5.43672	25.4833
American Samoa	1994	30.98	0.626053	5.42729	25.5527
American Samoa	1995	31.05	0.629814	5.4335	25.6165
American Samoa	1996	31.21	0.632707	5.42632	25.7837
American Samoa	1997	31.41	0.634927	5.42266	25.9873
American Samoa	1998	31.73	0.636598	5.42112	26.3089
American Samoa	1999	32.02	0.638322	5.43278	26.5872
American Samoa	2000	32.17	0.64061	5.42918	26.7408
American Samoa	2001	32.31	0.643214	5.43511	26.8749
American Samoa	2002	32.38	0.646002	5.42137	26.9586
American Samoa	2003	32.15	0.648952	5.42	26.73
American Samoa	2004	32.35	0.651921	5.42021	26.9298
American Samoa	2005	32.28	0.655061	5.42007	26.8599
American Samoa	2006	32.45	0.657726	5.42021	27.0298
American Samoa	2007	32.7	0.660781	5.42822	27.2718
American Samoa	2008	32.89	0.664026	5.42793	27.4621
American Samoa	2009	32.2	0.667301	5.43125	26.7687
American Samoa	2010	33.08	0.671249	5.42063	27.6594
American Samoa	2011	33.26	0.675979	5.4244	27.8356
American Samoa	2012	33.43	0.680862	5.42584	28.0042
American Samoa	2013	33.42	0.685833	5.43032	27.9897
American Samoa	2014	33.68	0.691343	5.42692	28.2531
American Samoa	2015	33.74	0.697163	5.42422	28.3158
American Samoa	2016	33.85	0.702726	5.43038	28.4196
American Samoa	2017	33.98	0.707648	5.43026	28.5497
American Samoa	2018	34.12	0.712801	5.42302	28.697
American Samoa	2019	34.28	0.717308	5.42228	28.8577
American Samoa	2020	33.41	0.720839	5.42001	27.99
Eswatini	2021	8.6	0.58546	5.42089	3.17911
Andorra	1990	19.29	0.761464	5.42061	13.8694
Andorra	1991	19.25	0.764709	5.43369	13.8163
Andorra	1992	19.15	0.767188	5.42064	13.7294
Andorra	1993	19.17	0.768954	5.42002	13.75
Andorra	1994	19.15	0.770024	5.42	13.73
Andorra	1995	19.18	0.770989	5.42101	13.759
Andorra	1996	19.14	0.772403	5.42031	13.7197
Andorra	1997	18.97	0.774581	5.42035	13.5497
Andorra	1998	18.79	0.776973	5.42078	13.3692
Andorra	1999	18.62	0.77963	5.42453	13.1955
Andorra	2000	18.63	0.781977	5.42073	13.2093
Andorra	2001	19.11	0.785417	5.42109	13.6889
Andorra	2002	19.56	0.790159	5.42125	14.1387
Andorra	2003	19.88	0.797279	5.42083	14.4592
Andorra	2004	20.21	0.804732	5.43009	14.7799
Andorra	2005	20.66	0.812214	5.42004	15.24
Andorra	2006	21.12	0.819787	5.43034	15.6897
Andorra	2007	21.71	0.826617	5.42042	16.2896
Andorra	2008	22.07	0.831822	5.42007	16.6499
Andorra	2009	22.34	0.83593	5.42061	16.9194
Andorra	2010	22.4	0.83949	5.4244	16.9756
Andorra	2011	22.42	0.842795	5.42129	16.9987
Andorra	2012	22.38	0.845811	5.42071	16.9593
Andorra	2013	22.31	0.84833	5.42003	16.89
Andorra	2014	22.24	0.85101	5.42257	16.8174
Andorra	2015	22.26	0.853591	5.4214	16.8386
Andorra	2016	22.46	0.856257	5.42224	17.0378
Andorra	2017	22.88	0.859477	5.42001	17.46
Andorra	2018	23.29	0.862589	5.43334	17.8567
Andorra	2019	23.5	0.865621	5.43335	18.0666
Andorra	2020	22.7	0.867449	5.42013	17.2799
Mozambique	2021	10.55	0.326463	6.05006	4.49994
Angola	1990	9.75	0.270737	6.0502	3.6998
Angola	1991	10.11	0.275161	6.07502	4.03498
Angola	1992	10.13	0.279232	6.05258	4.07742
Angola	1993	9.39	0.281868	6.05513	3.33487
Angola	1994	10.11	0.284488	6.05	4.06
Angola	1995	10.55	0.287448	6.05021	4.49979
Angola	1996	10.81	0.291421	6.05002	4.75998
Angola	1997	10.84	0.295434	6.07021	4.76979
Angola	1998	10.24	0.299553	6.05144	4.18856
Angola	1999	10.85	0.30372	6.05011	4.79989
Angola	2000	11.24	0.307603	6.05243	5.18757
Angola	2001	11.55	0.311698	6.05001	5.49999
Angola	2002	12.28	0.316707	6.05826	6.22174
Angola	2003	12.64	0.321777	6.05252	6.58748
Angola	2004	12.73	0.327395	6.05043	6.67957
Angola	2005	13.17	0.333785	6.05253	7.11747
Angola	2006	13.38	0.341013	6.05261	7.32739
Angola	2007	13.77	0.348847	6.05108	7.71892
Angola	2008	14.12	0.357082	6.05027	8.06973
Angola	2009	14.33	0.364408	6.05211	8.27789
Angola	2010	14.65	0.372034	6.05039	8.59961
Angola	2011	14.92	0.380007	6.05008	8.86992
Angola	2012	15.13	0.387892	6.05046	9.07954
Angola	2013	15.43	0.395796	6.05038	9.37962
Angola	2014	15.87	0.40372	6.05021	9.81979
Angola	2015	16.12	0.411372	6.06119	10.0588
Angola	2016	16.28	0.418822	6.06778	10.2122
Angola	2017	16.41	0.426177	6.00752	10.4025
Angola	2018	16.49	0.433355	5.56036	10.9296
Angola	2019	16.55	0.440455	5.56927	10.9807
Angola	2020	15.28	0.447284	5.73037	9.54963
Guinea-Bissau	2021	11.23	0.35311	6.05014	5.17986
Antigua and Barbuda	1990	28.7	0.612105	5.42002	23.28
Antigua and Barbuda	1991	28.63	0.618817	5.4205	23.2095
Antigua and Barbuda	1992	28.67	0.624696	5.42	23.25
Antigua and Barbuda	1993	28.15	0.630076	5.42696	22.723
Antigua and Barbuda	1994	28.14	0.634769	5.43001	22.71
Antigua and Barbuda	1995	28.09	0.638009	5.42056	22.6694
Antigua and Barbuda	1996	29.38	0.641647	5.42722	23.9528
Antigua and Barbuda	1997	29.43	0.645896	5.4203	24.0097
Antigua and Barbuda	1998	30.29	0.650614	5.43002	24.86
Antigua and Barbuda	1999	30.53	0.655535	5.42253	25.1075
Antigua and Barbuda	2000	30.78	0.660819	5.42184	25.3582
Antigua and Barbuda	2001	31.22	0.665621	5.42059	25.7994
Antigua and Barbuda	2002	31.69	0.670361	5.42375	26.2662
Antigua and Barbuda	2003	32.04	0.675311	5.42582	26.6142
Antigua and Barbuda	2004	32.33	0.680412	5.42139	26.9086
Antigua and Barbuda	2005	32.59	0.685486	5.42	27.17
Antigua and Barbuda	2006	32.59	0.690826	5.42563	27.1644
Antigua and Barbuda	2007	31.45	0.69636	5.43085	26.0192
Antigua and Barbuda	2008	31.67	0.702175	5.42016	26.2498
Antigua and Barbuda	2009	32.88	0.707129	5.42109	27.4589
Antigua and Barbuda	2010	33.17	0.711432	5.42003	27.75
Antigua and Barbuda	2011	33.39	0.71549	5.42042	27.9696
Antigua and Barbuda	2012	33.62	0.719509	5.42179	28.1982
Antigua and Barbuda	2013	33.91	0.722865	5.42558	28.4844
Antigua and Barbuda	2014	33.92	0.725586	5.43067	28.4893
Antigua and Barbuda	2015	34.07	0.728373	5.42035	28.6497
Antigua and Barbuda	2016	34.06	0.731599	5.42069	28.6393
Antigua and Barbuda	2017	34.13	0.734964	5.42548	28.7045
Antigua and Barbuda	2018	34.28	0.738879	5.42028	28.8597
Antigua and Barbuda	2019	34.25	0.743053	5.42017	28.8298
Antigua and Barbuda	2020	34.54	0.746345	5.42503	29.115
Zimbabwe	2021	11.25	0.473819	5.70446	5.54554
Argentina	1990	13.23	0.587397	5.42458	7.80542
Argentina	1991	13.45	0.591708	5.42704	8.02296
Argentina	1992	13.51	0.597996	5.42258	8.08742
Argentina	1993	13.67	0.603739	5.43042	8.23958
Argentina	1994	13.82	0.609787	5.4267	8.3933
Argentina	1995	13.85	0.614474	5.42063	8.42937
Argentina	1996	13.73	0.618943	5.43415	8.29585
Argentina	1997	13.58	0.623934	5.43399	8.14601
Argentina	1998	13.36	0.628723	5.43439	7.92561
Argentina	1999	13.21	0.633175	5.42212	7.78788
Argentina	2000	13.33	0.638194	5.42008	7.90992
Argentina	2001	13.43	0.642176	5.42111	8.00889
Argentina	2002	13.49	0.644473	5.42167	8.06833
Argentina	2003	13.74	0.645907	5.42008	8.31992
Argentina	2004	14.16	0.648297	5.43678	8.72322
Argentina	2005	14.45	0.653369	5.42027	9.02973
Argentina	2006	14.63	0.657446	5.42208	9.20792
Argentina	2007	14.69	0.660188	5.42528	9.26472
Argentina	2008	14.98	0.663079	5.42168	9.55832
Argentina	2009	15.22	0.665912	5.42042	9.79958
Argentina	2010	15.39	0.669926	5.42224	9.96776
Argentina	2011	15.55	0.675243	5.43337	10.1166
Argentina	2012	15.72	0.679218	5.42245	10.2976
Argentina	2013	15.92	0.681633	5.43424	10.4858
Argentina	2014	16.17	0.684975	5.42698	10.743
Argentina	2015	16.26	0.69171	5.42098	10.839
Argentina	2016	16.21	0.698618	5.42047	10.7895
Argentina	2017	16.5	0.705136	5.42958	11.0704
Argentina	2018	16.64	0.712889	5.42033	11.2197
Argentina	2019	16.79	0.719003	5.42468	11.3653
Argentina	2020	15.85	0.721294	5.42022	10.4298
Malawi	2021	11.83	0.384554	6.05046	5.77954
Armenia	1990	25.28	0.544415	5.42004	19.86
Armenia	1991	24.78	0.547562	5.42056	19.3594
Armenia	1992	23.91	0.548975	5.43	18.48
Armenia	1993	23.28	0.551215	5.42136	17.8586
Armenia	1994	23.63	0.553784	5.42534	18.2047
Armenia	1995	24.38	0.556816	5.42518	18.9548
Armenia	1996	24.85	0.560538	5.43414	19.4159
Armenia	1997	25.86	0.564627	5.42139	20.4386
Armenia	1998	26.58	0.569557	5.42006	21.1599
Armenia	1999	26.72	0.574323	5.42486	21.2951
Armenia	2000	27.27	0.579438	5.42003	21.85
Armenia	2001	27.29	0.585419	5.42722	21.8628
Armenia	2002	27.27	0.592711	5.43026	21.8397
Armenia	2003	27.14	0.600809	5.42002	21.72
Armenia	2004	27.05	0.609032	5.42025	21.6298
Armenia	2005	26.91	0.61776	5.42219	21.4878
Armenia	2006	26.9	0.626688	5.42647	21.4735
Armenia	2007	27.36	0.635871	5.42272	21.9373
Armenia	2008	27.31	0.644432	5.42552	21.8845
Armenia	2009	27.41	0.649715	5.42011	21.9899
Armenia	2010	27.77	0.654812	5.42044	22.3496
Armenia	2011	28.06	0.659818	5.42016	22.6398
Armenia	2012	28.55	0.664833	5.43154	23.1185
Armenia	2013	29.02	0.669534	5.42418	23.5958
Armenia	2014	28.98	0.673932	5.43532	23.5447
Armenia	2015	28.88	0.678055	5.42346	23.4565
Armenia	2016	29.06	0.681746	5.42521	23.6348
Armenia	2017	29.88	0.68598	5.42048	24.4595
Armenia	2018	30.06	0.690277	5.43171	24.6283
Armenia	2019	29.9	0.694766	5.42444	24.4756
Armenia	2020	23.01	0.698269	5.43618	17.5738
Zambia	2021	11.55	0.505949	5.4232	6.1268
Australia	1990	23.23	0.725983	5.43266	17.7973
Australia	1991	23.76	0.72976	5.42223	18.3378
Australia	1992	24.04	0.733901	5.42007	18.6199
Australia	1993	24.34	0.738375	5.42166	18.9183
Australia	1994	24.46	0.742847	5.43032	19.0297
Australia	1995	24.67	0.747427	5.43001	19.24
Australia	1996	24.68	0.751992	5.42129	19.2587
Australia	1997	24.63	0.756634	5.42031	19.2097
Australia	1998	24.46	0.761133	5.42026	19.0397
Australia	1999	24.38	0.765698	5.42043	18.9596
Australia	2000	24.49	0.770224	5.4339	19.0561
Australia	2001	24.81	0.774663	5.43501	19.375
Australia	2002	25.18	0.779361	5.42103	19.759
Australia	2003	25.62	0.7836	5.42516	20.1948
Australia	2004	26.06	0.787017	5.42022	20.6398
Australia	2005	26.42	0.789616	5.4203	20.9997
Australia	2006	26.73	0.791156	5.42059	21.3094
Australia	2007	26.94	0.792533	5.42088	21.5191
Australia	2008	27.14	0.795293	5.42172	21.7183
Australia	2009	27.38	0.799174	5.42128	21.9587
Australia	2010	27.62	0.803562	5.42287	22.1971
Australia	2011	27.87	0.80752	5.43336	22.4366
Australia	2012	28.22	0.811644	5.42427	22.7957
Australia	2013	28.46	0.816454	5.42095	23.039
Australia	2014	28.6	0.820841	5.42373	23.1763
Australia	2015	28.68	0.824861	5.42438	23.2556
Australia	2016	28.87	0.82856	5.42328	23.4467
Australia	2017	29.03	0.831798	5.42013	23.6099
Australia	2018	29.21	0.835355	5.42011	23.7899
Australia	2019	29.02	0.839317	5.42016	23.5998
Australia	2020	28.75	0.842051	5.42003	23.33
South Sudan	2021	12.2	0.278371	6.0502	6.1498
Austria	1990	31.77	0.749854	5.4203	26.3497
Austria	1991	32.94	0.751653	5.42125	27.5187
Austria	1992	34.05	0.754375	5.42171	28.6283
Austria	1993	34.93	0.758805	5.42659	29.5034
Austria	1994	35.64	0.764704	5.42415	30.2158
Austria	1995	36.04	0.769827	5.42195	30.618
Austria	1996	36.18	0.774447	5.42167	30.7583
Austria	1997	36.2	0.779233	5.4316	30.7684
Austria	1998	36.08	0.783521	5.42479	30.6552
Austria	1999	36.06	0.787452	5.42019	30.6398
Austria	2000	36.21	0.791848	5.42556	30.7844
Austria	2001	36.61	0.79577	5.42931	31.1807
Austria	2002	37.05	0.799154	5.42501	31.625
Austria	2003	37.53	0.802043	5.42262	32.1074
Austria	2004	38.12	0.804889	5.42336	32.6966
Austria	2005	38.73	0.808419	5.42044	33.3096
Austria	2006	39.44	0.812065	5.42222	34.0178
Austria	2007	40.18	0.815481	5.42806	34.7519
Austria	2008	40.99	0.818794	5.43512	35.5549
Austria	2009	41.51	0.821541	5.42145	36.0886
Austria	2010	42.03	0.8245	5.42253	36.6075
Austria	2011	42.47	0.828002	5.42047	37.0495
Austria	2012	42.85	0.831113	5.43455	37.4155
Austria	2013	43.2	0.83368	5.42012	37.7799
Austria	2014	43.58	0.835839	5.42249	38.1575
Austria	2015	43.83	0.83758	5.4243	38.4057
Austria	2016	44.28	0.839884	5.423	38.857
Austria	2017	44.75	0.843173	5.42076	39.3292
Austria	2018	45.1	0.846614	5.42763	39.6724
Austria	2019	45.42	0.849863	5.42253	39.9975
Austria	2020	44.16	0.85202	5.42	38.74
Afghanistan	2021	12.5	0.3372	6.05078	6.44922
Azerbaijan	1990	22.37	0.595986	5.42422	16.9458
Azerbaijan	1991	21.85	0.595808	5.42696	16.423
Azerbaijan	1992	20.21	0.594651	5.42055	14.7894
Azerbaijan	1993	20.11	0.593543	5.42115	14.6888
Azerbaijan	1994	19.81	0.592089	5.42518	14.3848
Azerbaijan	1995	20.67	0.589441	5.42099	15.249
Azerbaijan	1996	21.45	0.586316	5.42	16.03
Azerbaijan	1997	22.14	0.583222	5.42059	16.7194
Azerbaijan	1998	22.74	0.580393	5.42018	17.3198
Azerbaijan	1999	23.19	0.579193	5.4205	17.7695
Azerbaijan	2000	23.5	0.580021	5.42004	18.08
Azerbaijan	2001	23.98	0.582194	5.43031	18.5497
Azerbaijan	2002	23.94	0.585716	5.43117	18.5088
Azerbaijan	2003	23.75	0.590039	5.42293	18.3271
Azerbaijan	2004	23.65	0.594646	5.43223	18.2178
Azerbaijan	2005	23.52	0.602485	5.42094	18.0991
Azerbaijan	2006	23.98	0.613771	5.42022	18.5598
Azerbaijan	2007	24.6	0.626111	5.43509	19.1649
Azerbaijan	2008	24.82	0.636901	5.42334	19.3967
Azerbaijan	2009	25.22	0.645163	5.42152	19.7985
Azerbaijan	2010	25.47	0.652057	5.42001	20.05
Azerbaijan	2011	25.75	0.657972	5.42072	20.3293
Azerbaijan	2012	26.06	0.662897	5.42885	20.6312
Azerbaijan	2013	26.48	0.667659	5.42349	21.0565
Azerbaijan	2014	26.83	0.672163	5.43688	21.3931
Azerbaijan	2015	27.12	0.676245	5.42677	21.6932
Azerbaijan	2016	27.31	0.679808	5.4309	21.8791
Azerbaijan	2017	27.29	0.683263	5.42328	21.8667
Azerbaijan	2018	27.87	0.686561	5.42125	22.4487
Azerbaijan	2019	28.19	0.689835	5.42018	22.7698
Azerbaijan	2020	24.42	0.692605	5.42316	18.9968
Niger	2021	15.9	0.168073	8.75938	7.14062
Bahamas	1990	25.83	0.693509	5.43172	20.3983
Bahamas	1991	25.87	0.689127	5.42008	20.4499
Bahamas	1992	25.77	0.687344	5.42001	20.35
Bahamas	1993	25.35	0.693817	5.42025	19.9298
Bahamas	1994	25.21	0.70682	5.42925	19.7808
Bahamas	1995	25.36	0.719382	5.42133	19.9387
Bahamas	1996	25.44	0.728479	5.42008	20.0199
Bahamas	1997	26.06	0.734781	5.42728	20.6327
Bahamas	1998	26.44	0.739281	5.43559	21.0044
Bahamas	1999	26.02	0.741623	5.43753	20.5825
Bahamas	2000	26.2	0.742518	5.43545	20.7646
Bahamas	2001	26.35	0.743593	5.42159	20.9284
Bahamas	2002	27.13	0.74625	5.42012	21.7099
Bahamas	2003	27.93	0.749917	5.43052	22.4995
Bahamas	2004	28.13	0.75376	5.43512	22.6949
Bahamas	2005	28.63	0.756783	5.43021	23.1998
Bahamas	2006	28.46	0.759186	5.42059	23.0394
Bahamas	2007	28.88	0.761991	5.43007	23.4499
Bahamas	2008	28.87	0.765591	5.43	23.44
Bahamas	2009	28.98	0.769562	5.42057	23.5594
Bahamas	2010	29.02	0.77412	5.43259	23.5874
Bahamas	2011	29.2	0.778282	5.42003	23.78
Bahamas	2012	29.23	0.781839	5.43169	23.7983
Bahamas	2013	29.47	0.784624	5.43157	24.0384
Bahamas	2014	29.17	0.787253	5.42013	23.7499
Bahamas	2015	29.44	0.789956	5.4239	24.0161
Bahamas	2016	29.39	0.792739	5.47997	23.91
Bahamas	2017	29.63	0.795347	5.43409	24.1959
Bahamas	2018	29.79	0.798179	5.42016	24.3698
Bahamas	2019	28.76	0.801033	5.42051	23.3395
Bahamas	2020	27.67	0.802948	5.43171	22.2383
Angola	2021	13.52	0.453722	5.82063	7.69937
Bahrain	1990	20.05	0.584579	5.42335	14.6266
Bahrain	1991	20.13	0.590597	5.42062	14.7094
Bahrain	1992	20.39	0.59604	5.43058	14.9594
Bahrain	1993	20.62	0.602166	5.4225	15.1975
Bahrain	1994	20.59	0.608134	5.42007	15.1699
Bahrain	1995	20.59	0.613851	5.43153	15.1585
Bahrain	1996	20.72	0.619485	5.43315	15.2868
Bahrain	1997	20.79	0.624596	5.42789	15.3621
Bahrain	1998	20.94	0.630738	5.42447	15.5155
Bahrain	1999	21.29	0.638083	5.43096	15.859
Bahrain	2000	21.1	0.646751	5.42705	15.673
Bahrain	2001	21.83	0.657196	5.42031	16.4097
Bahrain	2002	22.18	0.664901	5.425	16.755
Bahrain	2003	22.38	0.669564	5.42619	16.9538
Bahrain	2004	22.77	0.674148	5.42169	17.3483
Bahrain	2005	23.21	0.679791	5.43083	17.7792
Bahrain	2006	23.48	0.686144	5.43007	18.0499
Bahrain	2007	24.09	0.693045	5.43229	18.6577
Bahrain	2008	24.49	0.699806	5.43031	19.0597
Bahrain	2009	24.92	0.704886	5.42057	19.4994
Bahrain	2010	25.28	0.707903	5.4251	19.8549
Bahrain	2011	25.61	0.708959	5.42	20.19
Bahrain	2012	26.08	0.710362	5.43008	20.6499
Bahrain	2013	26.57	0.713343	5.42011	21.1499
Bahrain	2014	27	0.716768	5.4267	21.5733
Bahrain	2015	27.14	0.719927	5.43053	21.7095
Bahrain	2016	27.15	0.723611	5.4201	21.7299
Bahrain	2017	27.23	0.729323	5.43	21.8
Bahrain	2018	27.5	0.736193	5.43013	22.0699
Bahrain	2019	27.75	0.742848	5.42709	22.3229
Bahrain	2020	26.1	0.748103	5.42272	20.6773
Chad	2021	14.06	0.240436	6.05438	8.00562
Bangladesh	1990	19.42	0.228549	6.75332	12.6667
Bangladesh	1991	19.32	0.237207	6.22496	13.095
Bangladesh	1992	20.72	0.245248	6.05056	14.6694
Bangladesh	1993	21.11	0.252091	6.05106	15.0589
Bangladesh	1994	21.51	0.258997	6.0604	15.4496
Bangladesh	1995	21.65	0.265294	6.05017	15.5998
Bangladesh	1996	22.07	0.271178	6.05	16.02
Bangladesh	1997	22.54	0.277773	6.05016	16.4898
Bangladesh	1998	23.03	0.284516	6.05704	16.973
Bangladesh	1999	23.4	0.290951	6.05002	17.35
Bangladesh	2000	23.51	0.297252	6.05226	17.4577
Bangladesh	2001	23.87	0.303189	6.05078	17.8192
Bangladesh	2002	24.16	0.30864	6.07188	18.0881
Bangladesh	2003	24.43	0.31436	6.07042	18.3596
Bangladesh	2004	24.82	0.320923	6.0543	18.7657
Bangladesh	2005	25.05	0.328091	6.06033	18.9897
Bangladesh	2006	25.16	0.335691	6.05389	19.1061
Bangladesh	2007	25.35	0.343933	6.05259	19.2974
Bangladesh	2008	25.84	0.35252	6.07001	19.77
Bangladesh	2009	26.4	0.361482	6.05002	20.35
Bangladesh	2010	26.9	0.370599	6.07077	20.8292
Bangladesh	2011	27.68	0.380125	6.06266	21.6173
Bangladesh	2012	28.49	0.390624	6.0501	22.4399
Bangladesh	2013	28.93	0.401706	6.06673	22.8633
Bangladesh	2014	29.15	0.413263	6.06	23.09
Bangladesh	2015	29.49	0.425482	5.98128	23.5087
Bangladesh	2016	29.71	0.43771	5.61805	24.0919
Bangladesh	2017	29.73	0.449752	5.57906	24.1509
Bangladesh	2018	30.11	0.461718	5.6489	24.4611
Bangladesh	2019	30.4	0.473265	5.64576	24.7542
Bangladesh	2020	28.29	0.483079	5.6085	22.6815
Democratic Republic of the Congo	2021	14.07	0.38318	6.05009	8.01991
Barbados	1990	30.08	0.653583	5.43375	24.6462
Barbados	1991	30.18	0.656654	5.42207	24.7579
Barbados	1992	29.91	0.662447	5.43175	24.4783
Barbados	1993	29.77	0.668815	5.42534	24.3447
Barbados	1994	29.51	0.673409	5.42129	24.0887
Barbados	1995	29.37	0.676012	5.42002	23.95
Barbados	1996	29.41	0.677193	5.42056	23.9894
Barbados	1997	29.47	0.678645	5.42054	24.0495
Barbados	1998	29.94	0.679827	5.42042	24.5196
Barbados	1999	30.68	0.680398	5.42001	25.26
Barbados	2000	30.96	0.681304	5.42034	25.5397
Barbados	2001	31.87	0.683329	5.42106	26.4489
Barbados	2002	31.84	0.687808	5.42001	26.42
Barbados	2003	31.75	0.693236	5.42075	26.3293
Barbados	2004	32.12	0.69803	5.42068	26.6993
Barbados	2005	32.45	0.70151	5.43117	27.0188
Barbados	2006	32.46	0.703856	5.42287	27.0371
Barbados	2007	32.88	0.705872	5.42007	27.4599
Barbados	2008	33.33	0.708514	5.42212	27.9079
Barbados	2009	33.97	0.712143	5.42001	28.55
Barbados	2010	34.13	0.716209	5.43351	28.6965
Barbados	2011	34.29	0.720061	5.42128	28.8687
Barbados	2012	34.55	0.724162	5.42629	29.1237
Barbados	2013	34.54	0.727826	5.4275	29.1125
Barbados	2014	34.5	0.730383	5.42	29.08
Barbados	2015	34.58	0.732603	5.42091	29.1591
Barbados	2016	34.63	0.734913	5.42304	29.207
Barbados	2017	34.64	0.737157	5.42044	29.2196
Barbados	2018	34.56	0.739531	5.42063	29.1394
Barbados	2019	34.2	0.742239	5.4201	28.7799
Barbados	2020	34.59	0.744367	5.43359	29.1564
Burkina Faso	2021	14.14	0.285118	6.05343	8.08657
Belarus	1990	38.1	0.622447	5.42003	32.68
Belarus	1991	37.18	0.627038	5.42006	31.7599
Belarus	1992	36.25	0.632892	5.42001	30.83
Belarus	1993	34.19	0.639394	5.42038	28.7696
Belarus	1994	33.86	0.644653	5.42003	28.44
Belarus	1995	32.97	0.64896	5.42112	27.5489
Belarus	1996	33.19	0.652855	5.42052	27.7695
Belarus	1997	33.05	0.655627	5.43501	27.615
Belarus	1998	32.47	0.657246	5.42459	27.0454
Belarus	1999	32.05	0.660171	5.43003	26.62
Belarus	2000	33.39	0.664706	5.42012	27.9699
Belarus	2001	32.26	0.671333	5.42004	26.84
Belarus	2002	31.28	0.678122	5.42191	25.8581
Belarus	2003	31.83	0.684869	5.42127	26.4087
Belarus	2004	32.38	0.692502	5.42007	26.9599
Belarus	2005	31.85	0.698985	5.42696	26.423
Belarus	2006	32.83	0.705119	5.42423	27.4058
Belarus	2007	34.43	0.711497	5.42177	29.0082
Belarus	2008	34.43	0.719121	5.42574	29.0043
Belarus	2009	34.71	0.727293	5.42	29.29
Belarus	2010	34.49	0.734955	5.4209	29.0691
Belarus	2011	34.35	0.739504	5.42011	28.9299
Belarus	2012	37.64	0.743469	5.42004	32.22
Belarus	2013	38.38	0.748529	5.4203	32.9597
Belarus	2014	39.09	0.753511	5.42271	33.6673
Belarus	2015	40.18	0.758206	5.42266	34.7573
Belarus	2016	40.8	0.764328	5.42019	35.3798
Belarus	2017	41.18	0.771131	5.42085	35.7592
Belarus	2018	40.9	0.776569	5.42009	35.4799
Belarus	2019	40.73	0.780508	5.42359	35.3064
Belarus	2020	37.77	0.782382	5.43016	32.3398
Cameroon	2021	13.92	0.479691	5.80361	8.11639
Belgium	1990	34.8	0.737391	5.4255	29.3745
Belgium	1991	34.89	0.742173	5.43433	29.4557
Belgium	1992	34.97	0.748012	5.42121	29.5488
Belgium	1993	34.96	0.753685	5.42014	29.5399
Belgium	1994	35.03	0.758904	5.42017	29.6098
Belgium	1995	35.07	0.76317	5.43002	29.64
Belgium	1996	35.11	0.766826	5.43117	29.6788
Belgium	1997	34.87	0.770814	5.43827	29.4317
Belgium	1998	34.54	0.774228	5.43497	29.105
Belgium	1999	34.18	0.777041	5.42087	28.7591
Belgium	2000	34.16	0.780396	5.42448	28.7355
Belgium	2001	34.49	0.784713	5.42335	29.0666
Belgium	2002	35.02	0.788836	5.42	29.6
Belgium	2003	35.74	0.792014	5.43002	30.31
Belgium	2004	36.55	0.795225	5.42038	31.1296
Belgium	2005	37.17	0.798497	5.4208	31.7492
Belgium	2006	37.96	0.801573	5.4237	32.5363
Belgium	2007	38.82	0.804613	5.42048	33.3995
Belgium	2008	39.64	0.807758	5.42023	34.2198
Belgium	2009	40.41	0.811056	5.43251	34.9775
Belgium	2010	40.82	0.81503	5.42079	35.3992
Belgium	2011	40.86	0.81947	5.42669	35.4333
Belgium	2012	40.67	0.824226	5.4213	35.2487
Belgium	2013	40.57	0.82862	5.4251	35.1449
Belgium	2014	40.55	0.832425	5.42126	35.1287
Belgium	2015	40.58	0.835878	5.42105	35.1589
Belgium	2016	41.03	0.839463	5.43401	35.596
Belgium	2017	41.86	0.843212	5.43407	36.4259
Belgium	2018	42.65	0.846618	5.43859	37.2114
Belgium	2019	42.98	0.849498	5.4204	37.5596
Belgium	2020	41.03	0.851347	5.42029	35.6097
Mali	2021	14.19	0.26858	6.05053	8.13947
Belize	1990	30.62	0.423727	5.73892	24.8811
Belize	1991	30.09	0.433834	5.86888	24.2211
Belize	1992	30.29	0.444199	5.70819	24.5818
Belize	1993	30.14	0.455259	5.618	24.522
Belize	1994	29.73	0.465729	5.598	24.132
Belize	1995	29.34	0.475279	5.56363	23.7764
Belize	1996	28.86	0.482702	5.74489	23.1151
Belize	1997	27.89	0.48802	5.68543	22.2046
Belize	1998	26.9	0.491819	5.56467	21.3353
Belize	1999	26.27	0.49507	5.47601	20.794
Belize	2000	25.95	0.498644	5.43343	20.5166
Belize	2001	26.66	0.502399	5.42471	21.2353
Belize	2002	27.58	0.506872	5.42035	22.1596
Belize	2003	28.28	0.512679	5.42217	22.8578
Belize	2004	28.66	0.519697	5.42011	23.2399
Belize	2005	29.18	0.527231	5.4334	23.7466
Belize	2006	29.63	0.53489	5.43528	24.1947
Belize	2007	30.07	0.541901	5.42061	24.6494
Belize	2008	30.47	0.548093	5.43021	25.0398
Belize	2009	30.57	0.553466	5.43049	25.1395
Belize	2010	30.54	0.558547	5.43065	25.1093
Belize	2011	30.78	0.56344	5.42438	25.3556
Belize	2012	31.05	0.568456	5.42298	25.627
Belize	2013	31.12	0.573236	5.43164	25.6884
Belize	2014	30.91	0.578091	5.42056	25.4894
Belize	2015	30.69	0.583279	5.43368	25.2563
Belize	2016	30.74	0.588276	5.42273	25.3173
Belize	2017	31.07	0.593337	5.42185	25.6481
Belize	2018	31.26	0.598512	5.42034	25.8397
Belize	2019	31.61	0.603352	5.42002	26.19
Belize	2020	30.48	0.60706	5.42038	25.0596
Eritrea	2021	14.26	0.403864	6.07068	8.18932
Benin	1990	13.98	0.218907	7.15563	6.82437
Benin	1991	14.05	0.222539	7.15021	6.89979
Benin	1992	14.23	0.226323	6.85106	7.37894
Benin	1993	14.36	0.230313	6.75109	7.60891
Benin	1994	14.34	0.234032	6.24395	8.09605
Benin	1995	14.37	0.23801	6.06019	8.30981
Benin	1996	14.31	0.241895	6.05181	8.25819
Benin	1997	14.41	0.245732	6.06336	8.34664
Benin	1998	14.47	0.249376	6.05049	8.41951
Benin	1999	14.57	0.253215	6.05025	8.51975
Benin	2000	14.58	0.257381	6.05052	8.52948
Benin	2001	14.71	0.261388	6.07055	8.63945
Benin	2002	14.91	0.265417	6.05058	8.85942
Benin	2003	15.11	0.269544	6.05009	9.05991
Benin	2004	15.35	0.273941	6.05006	9.29994
Benin	2005	15.52	0.278407	6.05254	9.46746
Benin	2006	15.66	0.282934	6.05043	9.60957
Benin	2007	15.72	0.287673	6.05227	9.66773
Benin	2008	16.01	0.292627	6.05672	9.95328
Benin	2009	16.2	0.297702	6.05335	10.1467
Benin	2010	16.29	0.302809	6.053	10.237
Benin	2011	16.39	0.307926	6.05501	10.335
Benin	2012	16.51	0.313374	6.05181	10.4582
Benin	2013	16.74	0.319319	6.05042	10.6896
Benin	2014	16.9	0.325727	6.07127	10.8287
Benin	2015	17.04	0.332216	6.05002	10.99
Benin	2016	17.3	0.338764	6.05183	11.2482
Benin	2017	17.53	0.345607	6.05175	11.4782
Benin	2018	17.8	0.352653	6.05028	11.7497
Benin	2019	18.06	0.360031	6.08006	11.9799
Benin	2020	17.3	0.366964	6.07115	11.2288
Uganda	2021	14.28	0.423261	6.0244	8.2556
Bermuda	1990	26.95	0.696451	5.42595	21.5241
Bermuda	1991	27.52	0.700277	5.42008	22.0999
Bermuda	1992	28.14	0.703984	5.42506	22.7149
Bermuda	1993	28.93	0.707678	5.42016	23.5098
Bermuda	1994	29.34	0.711069	5.42003	23.92
Bermuda	1995	29.97	0.714469	5.4312	24.5388
Bermuda	1996	30.26	0.717832	5.42113	24.8389
Bermuda	1997	31.14	0.721643	5.43001	25.71
Bermuda	1998	31.7	0.725854	5.42177	26.2782
Bermuda	1999	32.02	0.73054	5.43057	26.5894
Bermuda	2000	31.88	0.735997	5.42094	26.4591
Bermuda	2001	32.81	0.741919	5.42605	27.384
Bermuda	2002	33.12	0.747545	5.43033	27.6897
Bermuda	2003	33.27	0.753305	5.42001	27.85
Bermuda	2004	33.55	0.759009	5.421	28.129
Bermuda	2005	33.73	0.764691	5.42003	28.31
Bermuda	2006	33.87	0.770597	5.42339	28.4466
Bermuda	2007	34.22	0.776114	5.43007	28.7899
Bermuda	2008	34.51	0.780358	5.42147	29.0885
Bermuda	2009	34.86	0.784759	5.42157	29.4384
Bermuda	2010	35.04	0.789181	5.42792	29.6121
Bermuda	2011	35.26	0.793381	5.42523	29.8348
Bermuda	2012	35.27	0.797485	5.43074	29.8393
Bermuda	2013	35.4	0.801388	5.42173	29.9783
Bermuda	2014	35.52	0.804923	5.42003	30.1
Bermuda	2015	35.7	0.807999	5.42027	30.2797
Bermuda	2016	35.82	0.810551	5.42819	30.3918
Bermuda	2017	36.11	0.812807	5.42852	30.6815
Bermuda	2018	36.39	0.814893	5.42045	30.9695
Bermuda	2019	36.5	0.817	5.42	31.08
Bermuda	2020	36.62	0.819203	5.42044	31.1996
Guinea	2021	14.49	0.336401	6.05509	8.43491
Bhutan	1990	21.44	0.21504	8.60178	12.8382
Bhutan	1991	21.87	0.221312	7.15273	14.7173
Bhutan	1992	22.29	0.228148	6.92504	15.365
Bhutan	1993	22.64	0.236005	6.24382	16.3962
Bhutan	1994	22.96	0.244331	6.05375	16.9062
Bhutan	1995	23.48	0.253292	6.05343	17.4266
Bhutan	1996	24.14	0.262363	6.05025	18.0898
Bhutan	1997	24.54	0.271487	6.05348	18.4865
Bhutan	1998	25	0.28044	6.0501	18.9499
Bhutan	1999	25.53	0.28951	6.05022	19.4798
Bhutan	2000	25.42	0.298805	6.05508	19.3649
Bhutan	2001	26.14	0.308201	6.05282	20.0872
Bhutan	2002	26.54	0.317944	6.05764	20.4824
Bhutan	2003	26.82	0.32767	6.05026	20.7697
Bhutan	2004	27.17	0.337286	6.05043	21.1196
Bhutan	2005	27.46	0.346999	6.06678	21.3932
Bhutan	2006	27.76	0.356824	6.05004	21.71
Bhutan	2007	28.07	0.36756	6.05128	22.0187
Bhutan	2008	28.33	0.378234	6.05688	22.2731
Bhutan	2009	28.49	0.388977	6.05446	22.4355
Bhutan	2010	28.78	0.399752	6.08023	22.6998
Bhutan	2011	29.04	0.410149	6.05131	22.9887
Bhutan	2012	29.28	0.419443	6.0501	23.2299
Bhutan	2013	29.51	0.427791	6.00956	23.5004
Bhutan	2014	29.71	0.434969	5.56889	24.1411
Bhutan	2015	29.89	0.441811	5.5621	24.3279
Bhutan	2016	30.08	0.448402	5.84068	24.2393
Bhutan	2017	30.29	0.45428	5.70499	24.585
Bhutan	2018	30.48	0.459625	5.5969	24.8831
Bhutan	2019	30.64	0.464633	5.58613	25.0539
Bhutan	2020	30.55	0.468714	5.60446	24.9455
Equatorial Guinea	2021	14.19	0.657857	5.42173	8.76827
Bolivia (Plurinational State of)	1990	21.67	0.423918	6.00094	15.6691
Bolivia (Plurinational State of)	1991	21.98	0.429398	5.70633	16.2737
Bolivia (Plurinational State of)	1992	22.47	0.434836	5.72956	16.7404
Bolivia (Plurinational State of)	1993	22.93	0.440602	5.92751	17.0025
Bolivia (Plurinational State of)	1994	23.51	0.446823	5.93449	17.5755
Bolivia (Plurinational State of)	1995	23.8	0.453479	5.6029	18.1971
Bolivia (Plurinational State of)	1996	24.21	0.460221	5.73837	18.4716
Bolivia (Plurinational State of)	1997	24.37	0.466983	5.60597	18.764
Bolivia (Plurinational State of)	1998	24.59	0.473796	5.60432	18.9857
Bolivia (Plurinational State of)	1999	24.83	0.480194	5.61924	19.2108
Bolivia (Plurinational State of)	2000	25.15	0.486328	5.73702	19.413
Bolivia (Plurinational State of)	2001	25.61	0.492031	5.64747	19.9625
Bolivia (Plurinational State of)	2002	25.97	0.497349	5.44032	20.5297
Bolivia (Plurinational State of)	2003	26.37	0.502366	5.42185	20.9482
Bolivia (Plurinational State of)	2004	26.88	0.507273	5.42501	21.455
Bolivia (Plurinational State of)	2005	27.27	0.512166	5.43612	21.8339
Bolivia (Plurinational State of)	2006	27.57	0.517146	5.43334	22.1367
Bolivia (Plurinational State of)	2007	27.92	0.521946	5.4202	22.4998
Bolivia (Plurinational State of)	2008	28.19	0.526944	5.42047	22.7695
Bolivia (Plurinational State of)	2009	28.52	0.531792	5.42341	23.0966
Bolivia (Plurinational State of)	2010	28.74	0.537009	5.4203	23.3197
Bolivia (Plurinational State of)	2011	28.91	0.542681	5.42093	23.4891
Bolivia (Plurinational State of)	2012	29.12	0.548615	5.42097	23.699
Bolivia (Plurinational State of)	2013	29.3	0.554788	5.43046	23.8695
Bolivia (Plurinational State of)	2014	29.52	0.560935	5.43778	24.0822
Bolivia (Plurinational State of)	2015	29.73	0.567001	5.42036	24.3096
Bolivia (Plurinational State of)	2016	29.96	0.57308	5.42003	24.54
Bolivia (Plurinational State of)	2017	30.17	0.579241	5.42384	24.7462
Bolivia (Plurinational State of)	2018	30.42	0.585184	5.42002	25
Bolivia (Plurinational State of)	2019	30.67	0.590692	5.42188	25.2481
Bolivia (Plurinational State of)	2020	23.65	0.594854	5.43091	18.2191
Togo	2021	14.88	0.408534	6.05114	8.82886
Bosnia and Herzegovina	1990	29.16	0.541133	5.43118	23.7288
Bosnia and Herzegovina	1991	28.55	0.541346	5.42047	23.1295
Bosnia and Herzegovina	1992	24.93	0.539303	5.42505	19.5049
Bosnia and Herzegovina	1993	26.04	0.536032	5.42255	20.6174
Bosnia and Herzegovina	1994	27.82	0.533853	5.42073	22.3993
Bosnia and Herzegovina	1995	23.36	0.534026	5.43292	17.9271
Bosnia and Herzegovina	1996	31.05	0.545549	5.43011	25.6199
Bosnia and Herzegovina	1997	31.75	0.563565	5.42339	26.3266
Bosnia and Herzegovina	1998	32.74	0.58183	5.42038	27.3196
Bosnia and Herzegovina	1999	33.55	0.597997	5.42214	28.1279
Bosnia and Herzegovina	2000	33.57	0.610951	5.42044	28.1496
Bosnia and Herzegovina	2001	33.82	0.621989	5.42022	28.3998
Bosnia and Herzegovina	2002	33.81	0.632076	5.43335	28.3766
Bosnia and Herzegovina	2003	33.97	0.640635	5.42018	28.5498
Bosnia and Herzegovina	2004	34.35	0.647794	5.43006	28.9199
Bosnia and Herzegovina	2005	33.68	0.653859	5.42212	28.2579
Bosnia and Herzegovina	2006	34.07	0.659814	5.4301	28.6399
Bosnia and Herzegovina	2007	33.37	0.665579	5.42088	27.9491
Bosnia and Herzegovina	2008	34.13	0.671101	5.42	28.71
Bosnia and Herzegovina	2009	34.42	0.676033	5.43194	28.9881
Bosnia and Herzegovina	2010	34.85	0.680824	5.43594	29.4141
Bosnia and Herzegovina	2011	34.88	0.685399	5.42175	29.4582
Bosnia and Herzegovina	2012	35.36	0.689507	5.43145	29.9286
Bosnia and Herzegovina	2013	35.32	0.693509	5.42154	29.8985
Bosnia and Herzegovina	2014	35.41	0.697032	5.42118	29.9888
Bosnia and Herzegovina	2015	35.24	0.700446	5.42284	29.8172
Bosnia and Herzegovina	2016	35.3	0.704079	5.42915	29.8709
Bosnia and Herzegovina	2017	35.65	0.708053	5.43001	30.22
Bosnia and Herzegovina	2018	35.54	0.712347	5.42004	30.12
Bosnia and Herzegovina	2019	35.21	0.716857	5.4203	29.7897
Bosnia and Herzegovina	2020	32.9	0.720202	5.43023	27.4698
Gambia	2021	14.99	0.409714	6.05011	8.93989
Botswana	1990	19.5	0.418078	6.06396	13.436
Botswana	1991	18.94	0.429752	5.67553	13.2645
Botswana	1992	17.95	0.440491	5.68634	12.2637
Botswana	1993	16.7	0.450524	5.56473	11.1353
Botswana	1994	15.28	0.459955	5.66672	9.61328
Botswana	1995	13.78	0.469267	5.58189	8.19811
Botswana	1996	12.43	0.478588	5.63972	6.79028
Botswana	1997	11.25	0.487768	5.77763	5.47237
Botswana	1998	10.26	0.496194	5.44282	4.81718
Botswana	1999	9.49	0.504979	5.4217	4.0683
Botswana	2000	8.87	0.513498	5.4325	3.4375
Botswana	2001	8.61	0.52137	5.43063	3.17937
Botswana	2002	8.81	0.529253	5.43127	3.37873
Botswana	2003	9.81	0.537	5.42254	4.38746
Botswana	2004	11.49	0.544349	5.42066	6.06934
Botswana	2005	13.22	0.551707	5.42004	7.79996
Botswana	2006	14.22	0.559222	5.43041	8.78959
Botswana	2007	15.42	0.566702	5.42002	9.99998
Botswana	2008	16.16	0.573884	5.42099	10.739
Botswana	2009	16.95	0.579696	5.43335	11.5166
Botswana	2010	17.47	0.585824	5.42738	12.0426
Botswana	2011	18.15	0.591985	5.43594	12.7141
Botswana	2012	19.28	0.59774	5.42005	13.8599
Botswana	2013	20.06	0.604065	5.42097	14.639
Botswana	2014	20.95	0.610086	5.43168	15.5183
Botswana	2015	21.51	0.615411	5.42877	16.0812
Botswana	2016	22.18	0.620798	5.43596	16.744
Botswana	2017	22.87	0.625705	5.42005	17.4499
Botswana	2018	23.25	0.630607	5.4201	17.8299
Botswana	2019	23.52	0.635324	5.42938	18.0906
Botswana	2020	22.95	0.639275	5.42017	17.5298
Namibia	2021	14.42	0.617565	5.42376	8.99624
Brazil	1990	21.15	0.500071	5.42126	15.7287
Brazil	1991	20.95	0.504785	5.42035	15.5296
Brazil	1992	20.58	0.50854	5.424	15.156
Brazil	1993	20.09	0.512082	5.4227	14.6673
Brazil	1994	20.02	0.515761	5.43014	14.5899
Brazil	1995	20.03	0.519686	5.42013	14.6099
Brazil	1996	20.15	0.523863	5.4338	14.7162
Brazil	1997	20.42	0.528178	5.43366	14.9863
Brazil	1998	20.54	0.532481	5.42008	15.1199
Brazil	1999	20.7	0.536972	5.42008	15.2799
Brazil	2000	20.92	0.542051	5.42064	15.4994
Brazil	2001	21.09	0.547304	5.4251	15.6649
Brazil	2002	21.29	0.552776	5.42064	15.8694
Brazil	2003	21.46	0.558146	5.42	16.04
Brazil	2004	21.62	0.563773	5.42131	16.1987
Brazil	2005	22	0.569458	5.42251	16.5775
Brazil	2006	22.18	0.575339	5.437	16.743
Brazil	2007	22.35	0.581589	5.422	16.928
Brazil	2008	22.49	0.588078	5.42169	17.0683
Brazil	2009	22.59	0.594073	5.42132	17.1687
Brazil	2010	22.71	0.600446	5.42159	17.2884
Brazil	2011	22.82	0.606777	5.42092	17.3991
Brazil	2012	23.05	0.612619	5.42126	17.6287
Brazil	2013	23.21	0.618218	5.42102	17.789
Brazil	2014	23.4	0.623434	5.43017	17.9698
Brazil	2015	23.54	0.62815	5.43099	18.109
Brazil	2016	23.18	0.632235	5.42012	17.7599
Brazil	2017	22.83	0.636422	5.43032	17.3997
Brazil	2018	22.36	0.640803	5.42086	16.9391
Brazil	2019	22.15	0.645298	5.43009	16.7199
Brazil	2020	20.99	0.649202	5.42036	15.5696
Congo	2021	14.85	0.583075	5.42074	9.42926
Brunei Darussalam	1990	12.36	0.666082	5.42337	6.93663
Brunei Darussalam	1991	12.59	0.671234	5.42155	7.16845
Brunei Darussalam	1992	12.82	0.676703	5.42093	7.39907
Brunei Darussalam	1993	13.03	0.682175	5.42537	7.60463
Brunei Darussalam	1994	13.31	0.687394	5.42861	7.88139
Brunei Darussalam	1995	13.55	0.692471	5.42126	8.12874
Brunei Darussalam	1996	13.71	0.697602	5.42001	8.28999
Brunei Darussalam	1997	13.74	0.702944	5.42045	8.31955
Brunei Darussalam	1998	13.58	0.70863	5.42473	8.15527
Brunei Darussalam	1999	13.55	0.714851	5.43026	8.11974
Brunei Darussalam	2000	13.64	0.721552	5.42158	8.21842
Brunei Darussalam	2001	13.84	0.728535	5.43348	8.40652
Brunei Darussalam	2002	14.01	0.735344	5.42348	8.58652
Brunei Darussalam	2003	14.11	0.741578	5.42029	8.68971
Brunei Darussalam	2004	14.26	0.747312	5.42248	8.83752
Brunei Darussalam	2005	14.46	0.752482	5.42044	9.03956
Brunei Darussalam	2006	14.73	0.757319	5.42554	9.30446
Brunei Darussalam	2007	14.91	0.761643	5.42314	9.48686
Brunei Darussalam	2008	15.08	0.765714	5.42695	9.65305
Brunei Darussalam	2009	15.12	0.769602	5.425	9.695
Brunei Darussalam	2010	15.1	0.773219	5.43201	9.66799
Brunei Darussalam	2011	15.21	0.776632	5.43161	9.77839
Brunei Darussalam	2012	15.33	0.780217	5.42012	9.90988
Brunei Darussalam	2013	15.28	0.784017	5.42712	9.85288
Brunei Darussalam	2014	15.26	0.787733	5.42557	9.83443
Brunei Darussalam	2015	15.25	0.791368	5.42036	9.82964
Brunei Darussalam	2016	15.26	0.794981	5.42045	9.83955
Brunei Darussalam	2017	15.36	0.79831	5.42167	9.93833
Brunei Darussalam	2018	15.46	0.801437	5.42025	10.0397
Brunei Darussalam	2019	15.59	0.804499	5.42268	10.1673
Brunei Darussalam	2020	15.38	0.807424	5.43063	9.94937
Gabon	2021	14.86	0.634691	5.42021	9.43979
Bulgaria	1990	25.31	0.633446	5.43002	19.88
Bulgaria	1991	26.03	0.643069	5.42247	20.6075
Bulgaria	1992	25.78	0.651187	5.42732	20.3527
Bulgaria	1993	25.58	0.659162	5.43336	20.1466
Bulgaria	1994	25.24	0.66743	5.42673	19.8133
Bulgaria	1995	25.38	0.674	5.42206	19.9579
Bulgaria	1996	25.58	0.678863	5.42023	20.1598
Bulgaria	1997	25.15	0.680221	5.42194	19.7281
Bulgaria	1998	25.45	0.678497	5.42007	20.0299
Bulgaria	1999	26.43	0.677447	5.4313	20.9987
Bulgaria	2000	26.47	0.681005	5.42044	21.0496
Bulgaria	2001	26.69	0.686487	5.42005	21.27
Bulgaria	2002	26.94	0.691512	5.42839	21.5116
Bulgaria	2003	26.97	0.695566	5.43391	21.5361
Bulgaria	2004	26.91	0.699882	5.43017	21.4798
Bulgaria	2005	26.73	0.704471	5.42279	21.3072
Bulgaria	2006	26.83	0.708868	5.435	21.395
Bulgaria	2007	27.19	0.713192	5.42017	21.7698
Bulgaria	2008	27.5	0.717672	5.42003	22.08
Bulgaria	2009	27.78	0.723677	5.42115	22.3588
Bulgaria	2010	28.23	0.730702	5.42491	22.8051
Bulgaria	2011	28.53	0.735749	5.42118	23.1088
Bulgaria	2012	28.9	0.739178	5.4202	23.4798
Bulgaria	2013	29.17	0.742136	5.4241	23.7459
Bulgaria	2014	28.92	0.745373	5.43895	23.4811
Bulgaria	2015	29.19	0.748979	5.42023	23.7698
Bulgaria	2016	29.12	0.752259	5.4235	23.6965
Bulgaria	2017	29.21	0.755666	5.42042	23.7896
Bulgaria	2018	29.18	0.759148	5.42792	23.7521
Bulgaria	2019	29.24	0.76236	5.42337	23.8166
Bulgaria	2020	26.64	0.76509	5.42003	21.22
Sierra Leone	2021	15.6	0.358666	6.05516	9.54484
Burkina Faso	1990	11.68	0.129696	8.74681	2.93319
Burkina Faso	1991	11.57	0.133299	9.17141	2.39859
Burkina Faso	1992	11.47	0.136595	9.14362	2.32638
Burkina Faso	1993	11.38	0.139825	8.91615	2.46385
Burkina Faso	1994	11.32	0.142849	8.73238	2.58762
Burkina Faso	1995	11.3	0.146116	9.10425	2.19575
Burkina Faso	1996	10.89	0.150042	8.85619	2.03381
Burkina Faso	1997	11.21	0.154228	9.04226	2.16774
Burkina Faso	1998	11.56	0.158707	8.92507	2.63493
Burkina Faso	1999	11.76	0.163468	8.71885	3.04115
Burkina Faso	2000	11.9	0.168084	9.14515	2.75485
Burkina Faso	2001	12.07	0.172996	8.85912	3.21088
Burkina Faso	2002	12.32	0.177982	8.81556	3.50444
Burkina Faso	2003	12.62	0.183254	8.75453	3.86547
Burkina Faso	2004	12.95	0.188565	9.18855	3.76145
Burkina Faso	2005	13.28	0.194086	8.87815	4.40185
Burkina Faso	2006	13.55	0.199572	8.71	4.84
Burkina Faso	2007	13.76	0.204891	8.63425	5.12575
Burkina Faso	2008	13.99	0.210223	8.57673	5.41327
Burkina Faso	2009	14.14	0.215423	8.14585	5.99415
Burkina Faso	2010	14.23	0.221001	7.1525	7.0775
Burkina Faso	2011	14.29	0.226697	6.84837	7.44163
Burkina Faso	2012	14.37	0.232589	6.555	7.815
Burkina Faso	2013	14.52	0.238497	6.12799	8.39201
Burkina Faso	2014	14.79	0.244379	6.05007	8.73993
Burkina Faso	2015	15.07	0.250208	6.05172	9.01828
Burkina Faso	2016	15.28	0.256082	6.05061	9.22939
Burkina Faso	2017	15.57	0.262033	6.05258	9.51742
Burkina Faso	2018	15.85	0.268102	6.05003	9.79997
Burkina Faso	2019	16.01	0.274287	6.07321	9.93679
Burkina Faso	2020	14.5	0.279871	6.0603	8.4397
Uruguay	2021	15.02	0.719283	5.42004	9.59996
Burundi	1990	9.77	0.205867	8.67067	1.09933
Burundi	1991	9.55	0.208496	8.57098	0.979015
Burundi	1992	9.37	0.210865	8.58343	0.786569
Burundi	1993	9.25	0.213249	8.5969	0.653101
Burundi	1994	7.18	0.215223	7.18	0
Burundi	1995	7.16	0.215632	7.15997	3.48287e-05
Burundi	1996	7.15	0.215526	7.15	0
Burundi	1997	7.18	0.215762	7.16022	0.0197761
Burundi	1998	7.51	0.216403	7.15006	0.359942
Burundi	1999	7.82	0.216856	7.15014	0.669861
Burundi	2000	8.05	0.21687	7.15	0.899999
Burundi	2001	8.66	0.216989	7.155	1.505
Burundi	2002	9.22	0.217782	7.15509	2.06491
Burundi	2003	9.71	0.218962	7.15059	2.55941
Burundi	2004	10.42	0.220919	7.15001	3.26999
Burundi	2005	11.1	0.223084	7.05011	4.04989
Burundi	2006	13.69	0.225822	6.83263	6.85737
Burundi	2007	14.46	0.228997	6.61986	7.84014
Burundi	2008	15.11	0.232854	6.55042	8.55958
Burundi	2009	15.5	0.236943	6.05736	9.44264
Burundi	2010	15.93	0.241448	6.05068	9.87932
Burundi	2011	16.27	0.246277	6.06417	10.2058
Burundi	2012	16.6	0.251572	6.05264	10.5474
Burundi	2013	16.85	0.257191	6.05836	10.7916
Burundi	2014	17.11	0.262795	6.06022	11.0498
Burundi	2015	17.27	0.267328	6.07011	11.1999
Burundi	2016	17.55	0.271588	6.07723	11.4728
Burundi	2017	17.81	0.275841	6.05251	11.7575
Burundi	2018	18.01	0.279733	6.05068	11.9593
Burundi	2019	18.2	0.283443	6.05006	12.1499
Burundi	2020	17.24	0.286496	6.0502	11.1898
Côte d'Ivoire	2021	15.64	0.425942	5.98146	9.65854
Cabo Verde	1990	20.59	0.276723	6.05013	14.5399
Cabo Verde	1991	20.5	0.282932	6.0503	14.4497
Cabo Verde	1992	20.53	0.28846	6.06532	14.4647
Cabo Verde	1993	20.48	0.294517	6.06056	14.4194
Cabo Verde	1994	20.43	0.302217	6.05024	14.3798
Cabo Verde	1995	20.02	0.310676	6.05033	13.9697
Cabo Verde	1996	20.12	0.319736	6.05031	14.0697
Cabo Verde	1997	19.79	0.32905	6.05141	13.7386
Cabo Verde	1998	19.91	0.338786	6.05021	13.8598
Cabo Verde	1999	19.84	0.349297	6.0504	13.7896
Cabo Verde	2000	20.12	0.359899	6.07255	14.0474
Cabo Verde	2001	20.23	0.37007	6.05225	14.1778
Cabo Verde	2002	20.29	0.379847	6.05662	14.2334
Cabo Verde	2003	20.36	0.38942	6.05153	14.3085
Cabo Verde	2004	20.44	0.398839	6.05132	14.3887
Cabo Verde	2005	20.57	0.408009	6.05073	14.5193
Cabo Verde	2006	21.63	0.417434	6.05063	15.5794
Cabo Verde	2007	21.78	0.42738	5.97435	15.8057
Cabo Verde	2008	22.28	0.437372	5.69352	16.5865
Cabo Verde	2009	22.39	0.446692	5.60483	16.7852
Cabo Verde	2010	22.61	0.455648	5.57025	17.0397
Cabo Verde	2011	22.63	0.464474	5.56865	17.0614
Cabo Verde	2012	22.58	0.472858	5.74873	16.8313
Cabo Verde	2013	22.7	0.480796	5.61255	17.0875
Cabo Verde	2014	22.96	0.48826	5.64022	17.3198
Cabo Verde	2015	23.01	0.495229	5.5202	17.4898
Cabo Verde	2016	23.18	0.501855	5.42289	17.7571
Cabo Verde	2017	23.01	0.508436	5.42084	17.5892
Cabo Verde	2018	21	0.515286	5.43563	15.5644
Cabo Verde	2019	21.14	0.522488	5.42521	15.7148
Cabo Verde	2020	20.86	0.528462	5.42901	15.431
Benin	2021	15.77	0.373487	6.05204	9.71796
Cambodia	1990	22.11	0.289075	6.05001	16.06
Cambodia	1991	22.52	0.292479	6.07722	16.4428
Cambodia	1992	22.9	0.296901	6.05008	16.8499
Cambodia	1993	23.11	0.301627	6.05017	17.0598
Cambodia	1994	23.13	0.305723	6.06101	17.069
Cambodia	1995	23.31	0.310679	6.05026	17.2597
Cambodia	1996	23.52	0.315631	6.06755	17.4525
Cambodia	1997	23.73	0.320504	6.05042	17.6796
Cambodia	1998	23.89	0.324974	6.05076	17.8392
Cambodia	1999	24.17	0.330224	6.07699	18.093
Cambodia	2000	24.32	0.336075	6.05396	18.266
Cambodia	2001	24.71	0.342508	6.05806	18.6519
Cambodia	2002	25.11	0.349466	6.05056	19.0594
Cambodia	2003	25.57	0.35693	6.07299	19.497
Cambodia	2004	26.05	0.364855	6.06007	19.9899
Cambodia	2005	26.64	0.373332	6.05088	20.5891
Cambodia	2006	27.28	0.381698	6.05833	21.2217
Cambodia	2007	27.75	0.389876	6.06368	21.6863
Cambodia	2008	28.24	0.39768	6.05233	22.1877
Cambodia	2009	28.57	0.404221	6.05034	22.5197
Cambodia	2010	28.84	0.410211	6.05721	22.7828
Cambodia	2011	29.31	0.415964	6.07705	23.233
Cambodia	2012	29.74	0.42177	6.07315	23.6669
Cambodia	2013	30.14	0.427715	5.94789	24.1921
Cambodia	2014	30.46	0.433598	5.65065	24.8093
Cambodia	2015	30.74	0.439487	5.58116	25.1588
Cambodia	2016	31.06	0.445358	5.62459	25.4354
Cambodia	2017	31.4	0.451222	5.59918	25.8008
Cambodia	2018	31.78	0.457341	5.70328	26.0767
Cambodia	2019	32.12	0.463643	5.96479	26.1552
Cambodia	2020	32.34	0.468876	5.61686	26.7231
Brunei Darussalam	2021	15.28	0.810234	5.425	9.855
Cameroon	1990	15.14	0.303055	6.07418	9.06582
Cameroon	1991	14.95	0.309623	6.06084	8.88916
Cameroon	1992	14.57	0.315601	6.05067	8.51933
Cameroon	1993	14.25	0.320832	6.05079	8.19921
Cameroon	1994	14.06	0.32541	6.05029	8.00971
Cameroon	1995	13.73	0.329539	6.05115	7.67885
Cameroon	1996	13.44	0.333426	6.0708	7.3692
Cameroon	1997	13.04	0.337346	6.05753	6.98247
Cameroon	1998	12.7	0.341197	6.05014	6.64986
Cameroon	1999	12.52	0.344955	6.06089	6.45911
Cameroon	2000	12.31	0.348815	6.05509	6.25491
Cameroon	2001	12.2	0.352632	6.05094	6.14906
Cameroon	2002	12.12	0.356512	6.05279	6.06721
Cameroon	2003	12.13	0.360669	6.05021	6.07979
Cameroon	2004	12.36	0.3651	6.05602	6.30398
Cameroon	2005	12.63	0.369546	6.05001	6.57999
Cameroon	2006	12.82	0.374356	6.05002	6.76998
Cameroon	2007	13.01	0.37949	6.05014	6.95986
Cameroon	2008	13.35	0.384838	6.08514	7.26486
Cameroon	2009	13.68	0.390289	6.05011	7.62989
Cameroon	2010	13.93	0.396067	6.05355	7.87645
Cameroon	2011	14.14	0.402093	6.07836	8.06164
Cameroon	2012	14.22	0.40858	6.05002	8.16998
Cameroon	2013	14.24	0.415608	6.05007	8.18993
Cameroon	2014	14.36	0.423034	6.05001	8.30999
Cameroon	2015	14.7	0.43083	5.59564	9.10436
Cameroon	2016	15.22	0.438879	5.56085	9.65915
Cameroon	2017	15.7	0.447185	5.93892	9.76108
Cameroon	2018	16.13	0.455688	5.57583	10.5542
Cameroon	2019	16.52	0.464246	5.60196	10.918
Cameroon	2020	15.39	0.472286	5.93446	9.45554
Burundi	2021	16.08	0.289374	6.05006	10.0299
Canada	1990	20.7	0.781978	5.42586	15.2741
Canada	1991	20.97	0.784159	5.42036	15.5496
Canada	1992	21.17	0.787031	5.42167	15.7483
Canada	1993	21.23	0.789717	5.42023	15.8098
Canada	1994	21.37	0.792599	5.42313	15.9469
Canada	1995	21.46	0.796521	5.43065	16.0293
Canada	1996	21.56	0.801065	5.42124	16.1388
Canada	1997	21.45	0.804833	5.43011	16.0199
Canada	1998	21.24	0.808135	5.42347	15.8165
Canada	1999	21.08	0.812266	5.43086	15.6491
Canada	2000	21.18	0.816685	5.42021	15.7598
Canada	2001	21.43	0.820696	5.42017	16.0098
Canada	2002	21.76	0.824402	5.42339	16.3366
Canada	2003	22.11	0.827801	5.42218	16.6878
Canada	2004	22.56	0.830928	5.42029	17.1397
Canada	2005	22.97	0.833288	5.42185	17.5481
Canada	2006	23.53	0.834916	5.42009	18.1099
Canada	2007	24.11	0.836625	5.42938	18.6806
Canada	2008	24.77	0.838914	5.42199	19.348
Canada	2009	25.39	0.841584	5.43431	19.9557
Canada	2010	25.81	0.844853	5.42101	20.389
Canada	2011	26.02	0.848018	5.4213	20.5987
Canada	2012	25.99	0.850978	5.42092	20.5691
Canada	2013	25.91	0.853845	5.43002	20.48
Canada	2014	25.8	0.85676	5.42882	20.3712
Canada	2015	25.95	0.859533	5.4335	20.5165
Canada	2016	25.93	0.862174	5.42626	20.5037
Canada	2017	25.95	0.865054	5.43954	20.5105
Canada	2018	26.01	0.867906	5.42058	20.5894
Canada	2019	26.09	0.870554	5.42255	20.6675
Canada	2020	24.8	0.871993	5.42533	19.3747
Madagascar	2021	16.14	0.400247	6.05013	10.0899
Central African Republic	1990	7.47	0.216825	7.15753	0.312469
Central African Republic	1991	7.24	0.220192	7.15531	0.0846874
Central African Republic	1992	6.98	0.223008	6.98	0
Central African Republic	1993	6.77	0.225451	6.77	0
Central African Republic	1994	6.52	0.228488	6.52	0
Central African Republic	1995	6.33	0.231697	6.33	0
Central African Republic	1996	6.15	0.23399	6.15	0
Central African Republic	1997	6.05	0.236672	6.05	0
Central African Republic	1998	6.06	0.239744	6.05104	0.00896391
Central African Republic	1999	6.09	0.242989	6.08145	0.00854693
Central African Republic	2000	6.11	0.246021	6.05662	0.0533832
Central African Republic	2001	6.18	0.249247	6.05361	0.126386
Central African Republic	2002	6.26	0.252524	6.05021	0.209792
Central African Republic	2003	6.4	0.255102	6.05032	0.349675
Central African Republic	2004	6.53	0.257779	6.05064	0.479362
Central African Republic	2005	6.72	0.260452	6.05341	0.666587
Central African Republic	2006	6.91	0.263712	6.05015	0.859849
Central African Republic	2007	7.16	0.267332	6.0507	1.1093
Central African Republic	2008	7.52	0.271158	6.05636	1.46364
Central African Republic	2009	7.76	0.275339	6.05083	1.70917
Central African Republic	2010	7.9	0.279981	6.05098	1.84902
Central African Republic	2011	8.02	0.285097	6.06005	1.95995
Central African Republic	2012	8.21	0.29046	6.06072	2.14928
Central African Republic	2013	7.88	0.290105	6.05334	1.82666
Central African Republic	2014	7.7	0.289999	6.05011	1.64989
Central African Republic	2015	8.52	0.290828	6.06778	2.45222
Central African Republic	2016	8.63	0.29243	6.05074	2.57926
Central African Republic	2017	8.33	0.294752	6.05005	2.27995
Central African Republic	2018	8.81	0.298011	6.06361	2.74639
Central African Republic	2019	9.25	0.301953	6.06082	3.18918
Central African Republic	2020	7.72	0.305426	6.05033	1.66967
Ghana	2021	15.73	0.56493	5.42013	10.3099
Chad	1990	13.22	0.114639	9.15913	4.06087
Chad	1991	13.3	0.117955	8.72051	4.57949
Chad	1992	13.09	0.121133	8.81104	4.27896
Chad	1993	13.18	0.1236	9.16715	4.01285
Chad	1994	12.99	0.126081	9.10046	3.88954
Chad	1995	12.91	0.128289	9.28429	3.62571
Chad	1996	12.59	0.130169	8.88752	3.70248
Chad	1997	12.28	0.132136	8.84095	3.43905
Chad	1998	12.08	0.13409	9.18027	2.89973
Chad	1999	12.01	0.135825	8.8447	3.1653
Chad	2000	11.8	0.137412	9.20907	2.59093
Chad	2001	11.99	0.139664	8.89936	3.09064
Chad	2002	12.05	0.142042	8.73307	3.31693
Chad	2003	12.19	0.145348	9.00861	3.18139
Chad	2004	12.42	0.150911	9.14058	3.27942
Chad	2005	12.71	0.157033	8.82935	3.88065
Chad	2006	12.7	0.162576	9.02148	3.67852
Chad	2007	13.21	0.168161	9.13879	4.07121
Chad	2008	13.36	0.173397	8.8405	4.5195
Chad	2009	13.76	0.178335	8.75219	5.00781
Chad	2010	13.99	0.184111	8.73316	5.25684
Chad	2011	14.18	0.189592	9.07965	5.10035
Chad	2012	14.41	0.195263	8.97374	5.43626
Chad	2013	14.64	0.200953	8.71016	5.92984
Chad	2014	14.9	0.206659	8.65339	6.24661
Chad	2015	15.07	0.212429	8.60137	6.46863
Chad	2016	15.29	0.217532	7.1584	8.1316
Chad	2017	15.32	0.222207	7.15333	8.16667
Chad	2018	15.37	0.226914	6.9271	8.4429
Chad	2019	15.5	0.231705	6.40403	9.09597
Chad	2020	13.67	0.236103	6.2479	7.4221
Argentina	2021	15.77	0.723123	5.42006	10.3499
Chile	1990	16.46	0.586495	5.42493	11.0351
Chile	1991	17.17	0.593007	5.42751	11.7425
Chile	1992	17.73	0.599106	5.42133	12.3087
Chile	1993	17.86	0.604829	5.42028	12.4397
Chile	1994	17.94	0.610674	5.44303	12.497
Chile	1995	17.88	0.617235	5.43066	12.4493
Chile	1996	17.9	0.623694	5.42057	12.4794
Chile	1997	17.92	0.63054	5.42311	12.4969
Chile	1998	17.81	0.638083	5.43167	12.3783
Chile	1999	17.72	0.645928	5.42346	12.2965
Chile	2000	17.83	0.652989	5.42792	12.4021
Chile	2001	17.9	0.660266	5.43308	12.4669
Chile	2002	18.26	0.667888	5.42013	12.8399
Chile	2003	18.56	0.673446	5.43	13.13
Chile	2004	18.9	0.678258	5.42021	13.4798
Chile	2005	19.28	0.682589	5.43019	13.8498
Chile	2006	19.58	0.685893	5.42013	14.1599
Chile	2007	19.8	0.68893	5.42009	14.3799
Chile	2008	20.06	0.69236	5.43563	14.6244
Chile	2009	20.12	0.696602	5.42332	14.6967
Chile	2010	20.27	0.702305	5.42236	14.8476
Chile	2011	20.61	0.708598	5.43561	15.1744
Chile	2012	20.89	0.714743	5.4202	15.4698
Chile	2013	21.1	0.720449	5.42168	15.6783
Chile	2014	21.32	0.727276	5.4209	15.8991
Chile	2015	21.52	0.736098	5.42251	16.0975
Chile	2016	21.78	0.744972	5.42006	16.3599
Chile	2017	22	0.752058	5.42158	16.5784
Chile	2018	22.18	0.758626	5.43343	16.7466
Chile	2019	22.22	0.76512	5.42128	16.7987
Chile	2020	20.97	0.769214	5.4257	15.5443
Liberia	2021	16.67	0.352442	6.05039	10.6196
China	1990	26.56	0.458669	5.64172	20.9183
China	1991	25.72	0.467302	5.6526	20.0674
China	1992	24.98	0.475784	5.65029	19.3297
China	1993	24.41	0.484354	5.60484	18.8052
China	1994	24.14	0.492579	5.82715	18.3129
China	1995	24.09	0.501501	5.42253	18.6675
China	1996	24.4	0.512034	5.42354	18.9765
China	1997	24.77	0.522327	5.42155	19.3484
China	1998	25.04	0.531379	5.4201	19.6199
China	1999	25.27	0.540334	5.42251	19.8475
China	2000	25.23	0.547989	5.42316	19.8068
China	2001	25.37	0.55368	5.42639	19.9436
China	2002	25.51	0.560543	5.42003	20.09
China	2003	25.58	0.569019	5.42001	20.16
China	2004	25.65	0.578178	5.42037	20.2296
China	2005	26.09	0.588052	5.43021	20.6598
China	2006	27	0.598758	5.42035	21.5797
China	2007	27.61	0.60952	5.43172	22.1783
China	2008	27.79	0.619455	5.42367	22.3663
China	2009	28.16	0.629308	5.43254	22.7275
China	2010	28.44	0.641521	5.4257	23.0143
China	2011	28.8	0.651448	5.43542	23.3646
China	2012	29.09	0.657144	5.42044	23.6696
China	2013	29.47	0.663103	5.42513	24.0449
China	2014	29.91	0.668641	5.42422	24.4858
China	2015	30.2	0.67194	5.42005	24.78
China	2016	30.42	0.676218	5.43002	24.99
China	2017	30.73	0.68462	5.42502	25.305
China	2018	30.97	0.693718	5.43447	25.5355
China	2019	31.18	0.703687	5.43001	25.75
China	2020	31.23	0.713365	5.42051	25.8095
Republic of Korea	2021	16.21	0.886675	5.42505	10.7849
Colombia	1990	36.01	0.48072	5.74443	30.2656
Colombia	1991	35	0.48234	5.87909	29.1209
Colombia	1992	35	0.484572	5.59395	29.4061
Colombia	1993	35.63	0.488229	5.58052	30.0495
Colombia	1994	36.05	0.493278	5.53056	30.5194
Colombia	1995	36.59	0.499103	5.42708	31.1629
Colombia	1996	36.71	0.504987	5.42013	31.2899
Colombia	1997	37.63	0.51108	5.42002	32.21
Colombia	1998	38.19	0.517023	5.4203	32.7697
Colombia	1999	38.27	0.522436	5.42125	32.8487
Colombia	2000	38.32	0.527839	5.42011	32.8999
Colombia	2001	38.49	0.533077	5.42021	33.0698
Colombia	2002	38.73	0.538189	5.43041	33.2996
Colombia	2003	40.17	0.543265	5.42011	34.7499
Colombia	2004	40.54	0.548602	5.43112	35.1089
Colombia	2005	41.52	0.554089	5.4228	36.0972
Colombia	2006	41.7	0.560183	5.42542	36.2746
Colombia	2007	42.48	0.566823	5.4231	37.0569
Colombia	2008	42.66	0.573495	5.43374	37.2263
Colombia	2009	42.36	0.579876	5.42004	36.94
Colombia	2010	42.84	0.586408	5.43517	37.4048
Colombia	2011	43.69	0.59334	5.42	38.27
Colombia	2012	44.04	0.600254	5.42064	38.6194
Colombia	2013	44.45	0.607251	5.4267	39.0233
Colombia	2014	45.16	0.614152	5.42489	39.7351
Colombia	2015	45.17	0.620889	5.42042	39.7496
Colombia	2016	45.2	0.627554	5.42026	39.7797
Colombia	2017	45.49	0.63413	5.43179	40.0582
Colombia	2018	45.23	0.640255	5.43282	39.7972
Colombia	2019	45.46	0.646039	5.42063	40.0394
Colombia	2020	42.24	0.650855	5.42001	36.82
United Republic of Tanzania	2021	16.68	0.446568	5.87942	10.8006
Comoros	1990	15.66	0.270048	6.05042	9.60958
Comoros	1991	15.85	0.279146	6.05056	9.79944
Comoros	1992	16.05	0.288506	6.07023	9.97977
Comoros	1993	16.24	0.297607	6.06617	10.1738
Comoros	1994	16.38	0.305707	6.06048	10.3195
Comoros	1995	16.53	0.31422	6.05257	10.4774
Comoros	1996	15.81	0.322249	6.05726	9.75274
Comoros	1997	16.69	0.330148	6.05029	10.6397
Comoros	1998	16.78	0.337518	6.05	10.73
Comoros	1999	17.65	0.344775	6.05424	11.5958
Comoros	2000	17.87	0.351876	6.06105	11.8089
Comoros	2001	18.43	0.359212	6.05163	12.3784
Comoros	2002	18.62	0.366486	6.05003	12.57
Comoros	2003	19.18	0.373411	6.05	13.13
Comoros	2004	19.41	0.380036	6.05476	13.3552
Comoros	2005	19.55	0.386892	6.08	13.47
Comoros	2006	19.63	0.393521	6.05552	13.5745
Comoros	2007	19.6	0.399051	6.05141	13.5486
Comoros	2008	20.1	0.40465	6.05103	14.049
Comoros	2009	19.5	0.410254	6.06334	13.4367
Comoros	2010	20.44	0.415543	6.05097	14.389
Comoros	2011	20.05	0.421093	6.05254	13.9975
Comoros	2012	20.6	0.42673	5.85769	14.7423
Comoros	2013	20.84	0.43279	5.58331	15.2567
Comoros	2014	21.13	0.438845	5.61023	15.5198
Comoros	2015	21.37	0.444712	5.59284	15.7772
Comoros	2016	21.52	0.450507	5.57289	15.9471
Comoros	2017	21.54	0.456281	5.56148	15.9785
Comoros	2018	21.79	0.461951	5.72928	16.0607
Comoros	2019	21.64	0.467388	5.68765	15.9524
Comoros	2020	20.98	0.472003	5.58406	15.3959
Yemen	2021	16.55	0.450376	5.56326	10.9867
Congo	1990	10.5	0.420655	6.05042	4.44958
Congo	1991	10.43	0.426734	5.73976	4.69024
Congo	1992	10.37	0.431988	5.5655	4.8045
Congo	1993	10	0.436607	5.6449	4.3551
Congo	1994	10.08	0.440168	5.63618	4.44382
Congo	1995	10.04	0.443744	5.60511	4.43489
Congo	1996	10.07	0.447567	5.694	4.376
Congo	1997	7.41	0.451027	5.57794	1.83206
Congo	1998	9.26	0.454445	5.85299	3.40701
Congo	1999	10.41	0.457177	5.5855	4.8245
Congo	2000	10.97	0.460765	5.57608	5.39392
Congo	2001	11.57	0.463752	5.59404	5.97596
Congo	2002	12.06	0.467037	5.61382	6.44618
Congo	2003	12.45	0.470134	5.63083	6.81917
Congo	2004	12.98	0.473612	5.5716	7.4084
Congo	2005	13.66	0.478138	5.58117	8.07883
Congo	2006	14.26	0.483356	5.56709	8.69291
Congo	2007	14.61	0.487641	5.68471	8.92529
Congo	2008	15.11	0.492823	5.44214	9.66786
Congo	2009	15.55	0.4983	5.42749	10.1225
Congo	2010	15.89	0.505543	5.43167	10.4583
Congo	2011	16.12	0.513816	5.43481	10.6852
Congo	2012	15.99	0.522928	5.42008	10.5699
Congo	2013	16.19	0.531552	5.43507	10.7549
Congo	2014	16.31	0.540594	5.42064	10.8894
Congo	2015	16.52	0.548414	5.42003	11.1
Congo	2016	16.74	0.555109	5.42157	11.3184
Congo	2017	16.89	0.561834	5.43002	11.46
Congo	2018	17.03	0.567794	5.42067	11.6093
Congo	2019	17.19	0.573374	5.4303	11.7597
Congo	2020	15.49	0.578452	5.42705	10.0629
Rwanda	2021	16.89	0.435589	5.78085	11.1091
Cook Islands	1990	29.48	0.564515	5.43005	24.0499
Cook Islands	1991	30.51	0.570623	5.43341	25.0766
Cook Islands	1992	30.82	0.577123	5.42297	25.397
Cook Islands	1993	31.16	0.584059	5.42001	25.74
Cook Islands	1994	31.43	0.591541	5.42181	26.0082
Cook Islands	1995	31.7	0.59879	5.42085	26.2792
Cook Islands	1996	31.98	0.606414	5.43337	26.5466
Cook Islands	1997	30.96	0.613992	5.42067	25.5393
Cook Islands	1998	32.62	0.621202	5.42092	27.1991
Cook Islands	1999	32.94	0.628029	5.42255	27.5175
Cook Islands	2000	33.26	0.635366	5.42051	27.8395
Cook Islands	2001	33.63	0.644421	5.42007	28.2099
Cook Islands	2002	33.78	0.65279	5.43349	28.3465
Cook Islands	2003	33.94	0.661465	5.42551	28.5145
Cook Islands	2004	34.11	0.66877	5.43347	28.6765
Cook Islands	2005	34.35	0.674004	5.43545	28.9145
Cook Islands	2006	34.7	0.680644	5.4201	29.2799
Cook Islands	2007	34.98	0.687505	5.4246	29.5554
Cook Islands	2008	35.4	0.695592	5.42002	29.98
Cook Islands	2009	35.68	0.703777	5.42056	30.2594
Cook Islands	2010	35.78	0.711862	5.42042	30.3596
Cook Islands	2011	35.72	0.719445	5.42585	30.2941
Cook Islands	2012	35.71	0.726963	5.43004	30.28
Cook Islands	2013	35.72	0.733317	5.42197	30.298
Cook Islands	2014	35.78	0.739596	5.42022	30.3598
Cook Islands	2015	35.95	0.74655	5.42504	30.525
Cook Islands	2016	35.99	0.752353	5.42063	30.5694
Cook Islands	2017	36.26	0.758234	5.42106	30.8389
Cook Islands	2018	36.55	0.764041	5.425	31.125
Cook Islands	2019	36.86	0.769796	5.42006	31.4399
Cook Islands	2020	37.43	0.774701	5.42073	32.0093
Senegal	2021	17.41	0.408054	6.05009	11.3599
Costa Rica	1990	41.91	0.534125	5.42056	36.4894
Costa Rica	1991	41.91	0.539342	5.42004	36.49
Costa Rica	1992	41.53	0.544624	5.43005	36.1
Costa Rica	1993	41.78	0.549947	5.4202	36.3598
Costa Rica	1994	41.36	0.555171	5.42091	35.9391
Costa Rica	1995	41.04	0.560547	5.42533	35.6147
Costa Rica	1996	41.86	0.565181	5.42553	36.4345
Costa Rica	1997	41.85	0.570128	5.42058	36.4294
Costa Rica	1998	42.32	0.576067	5.42436	36.8956
Costa Rica	1999	42.11	0.582229	5.42	36.69
Costa Rica	2000	42.93	0.588243	5.42126	37.5087
Costa Rica	2001	43.19	0.594889	5.42007	37.7699
Costa Rica	2002	43.6	0.600894	5.4226	38.1774
Costa Rica	2003	43.7	0.605766	5.42005	38.28
Costa Rica	2004	43.69	0.610316	5.42135	38.2687
Costa Rica	2005	44.74	0.614413	5.42112	39.3189
Costa Rica	2006	44.12	0.61785	5.43054	38.6895
Costa Rica	2007	45.33	0.621201	5.42673	39.9033
Costa Rica	2008	45.15	0.625704	5.42262	39.7274
Costa Rica	2009	45.54	0.631291	5.42124	40.1188
Costa Rica	2010	44.42	0.636595	5.42543	38.9946
Costa Rica	2011	45.22	0.641201	5.42338	39.7966
Costa Rica	2012	45.43	0.646574	5.43083	39.9992
Costa Rica	2013	45.54	0.651946	5.42032	40.1197
Costa Rica	2014	45.53	0.65689	5.43531	40.0947
Costa Rica	2015	45.13	0.66203	5.42501	39.705
Costa Rica	2016	44.73	0.66743	5.43006	39.2999
Costa Rica	2017	44.99	0.673621	5.43001	39.56
Costa Rica	2018	44.57	0.681296	5.42017	39.1498
Costa Rica	2019	44.9	0.690049	5.42151	39.4785
Costa Rica	2020	44.13	0.696195	5.42	38.71
Djibouti	2021	16.99	0.487958	5.5696	11.4204
Croatia	1990	29.32	0.668906	5.4201	23.8999
Croatia	1991	26.95	0.674725	5.42306	21.5269
Croatia	1992	27.62	0.678093	5.42115	22.1988
Croatia	1993	28.53	0.678221	5.43438	23.0956
Croatia	1994	28.91	0.677548	5.42128	23.4887
Croatia	1995	28.54	0.677029	5.42035	23.1197
Croatia	1996	29.12	0.679507	5.43004	23.69
Croatia	1997	29.12	0.685365	5.43227	23.6877
Croatia	1998	29.58	0.691366	5.42901	24.151
Croatia	1999	29.87	0.696636	5.42085	24.4491
Croatia	2000	30.53	0.70304	5.43334	25.0967
Croatia	2001	30.9	0.709537	5.42676	25.4732
Croatia	2002	31.1	0.715383	5.42143	25.6786
Croatia	2003	31.09	0.72113	5.43339	25.6566
Croatia	2004	31.84	0.726328	5.43074	26.4093
Croatia	2005	31.58	0.732154	5.42333	26.1567
Croatia	2006	32.08	0.738067	5.43	26.65
Croatia	2007	32.08	0.743149	5.42047	26.6595
Croatia	2008	31.92	0.74847	5.42007	26.4999
Croatia	2009	32.57	0.754066	5.42021	27.1498
Croatia	2010	33.17	0.759472	5.42216	27.7478
Croatia	2011	33.5	0.763686	5.4239	28.0761
Croatia	2012	33.63	0.767405	5.42087	28.2091
Croatia	2013	34.48	0.771152	5.42063	29.0594
Croatia	2014	34.6	0.774479	5.42032	29.1797
Croatia	2015	34.46	0.777866	5.42502	29.035
Croatia	2016	35.01	0.781444	5.42031	29.5897
Croatia	2017	35.15	0.785075	5.42543	29.7246
Croatia	2018	35.12	0.788671	5.42011	29.6999
Croatia	2019	35.43	0.792475	5.43048	29.9995
Croatia	2020	34.42	0.795462	5.42	29
Botswana	2021	17.18	0.642722	5.42066	11.7593
Cuba	1990	31.72	0.558019	5.4334	26.2866
Cuba	1991	31.81	0.563414	5.42037	26.3896
Cuba	1992	31.78	0.566169	5.43066	26.3493
Cuba	1993	31.63	0.565441	5.42334	26.2067
Cuba	1994	31.49	0.563186	5.42303	26.067
Cuba	1995	31.79	0.560766	5.42022	26.3698
Cuba	1996	32.15	0.559346	5.425	26.725
Cuba	1997	32.18	0.558925	5.42291	26.7571
Cuba	1998	32.26	0.559363	5.43085	26.8291
Cuba	1999	32.42	0.561821	5.43338	26.9866
Cuba	2000	32.93	0.566677	5.42375	27.5062
Cuba	2001	33.17	0.572754	5.42028	27.7497
Cuba	2002	33.81	0.579968	5.4311	28.3789
Cuba	2003	33.96	0.587648	5.42834	28.5317
Cuba	2004	34.08	0.594349	5.4209	28.6591
Cuba	2005	33.96	0.599864	5.42513	28.5349
Cuba	2006	34.54	0.604971	5.42209	29.1179
Cuba	2007	34.67	0.607618	5.42036	29.2496
Cuba	2008	34.86	0.609401	5.42723	29.4328
Cuba	2009	34.78	0.611776	5.42543	29.3546
Cuba	2010	34.75	0.615261	5.43001	29.32
Cuba	2011	35.39	0.620387	5.42198	29.968
Cuba	2012	35.01	0.626156	5.42482	29.5852
Cuba	2013	35.04	0.63184	5.43008	29.6099
Cuba	2014	34.99	0.637304	5.42379	29.5662
Cuba	2015	34.7	0.642819	5.42127	29.2787
Cuba	2016	34.72	0.647908	5.42089	29.2991
Cuba	2017	34.43	0.652309	5.43003	29
Cuba	2018	34.47	0.656859	5.42008	29.0499
Cuba	2019	34.21	0.661675	5.43656	28.7734
Cuba	2020	34.24	0.665211	5.42073	28.8193
Singapore	2021	17.18	0.856098	5.4201	11.7599
Cyprus	1990	18.97	0.648231	5.43626	13.5337
Cyprus	1991	19.09	0.655726	5.42043	13.6696
Cyprus	1992	19.22	0.666012	5.42063	13.7994
Cyprus	1993	19.32	0.677547	5.42026	13.8997
Cyprus	1994	19.42	0.688829	5.42008	13.9999
Cyprus	1995	19.39	0.699924	5.42107	13.9689
Cyprus	1996	19.26	0.70984	5.4226	13.8374
Cyprus	1997	19.01	0.718864	5.42058	13.5894
Cyprus	1998	18.64	0.727964	5.42	13.22
Cyprus	1999	18.56	0.736846	5.42334	13.1367
Cyprus	2000	18.52	0.745199	5.42501	13.095
Cyprus	2001	18.7	0.753595	5.42133	13.2787
Cyprus	2002	18.94	0.761502	5.42011	13.5199
Cyprus	2003	19.27	0.767896	5.42344	13.8466
Cyprus	2004	19.67	0.773765	5.42674	14.2433
Cyprus	2005	19.96	0.779031	5.42265	14.5373
Cyprus	2006	20.41	0.784561	5.42064	14.9894
Cyprus	2007	20.91	0.792068	5.43624	15.4738
Cyprus	2008	21.42	0.799454	5.43064	15.9894
Cyprus	2009	21.79	0.805112	5.42209	16.3679
Cyprus	2010	22.08	0.80984	5.42559	16.6544
Cyprus	2011	22.18	0.813726	5.43032	16.7497
Cyprus	2012	22.21	0.816979	5.42409	16.7859
Cyprus	2013	22.08	0.819381	5.42189	16.6581
Cyprus	2014	22.05	0.821184	5.42528	16.6247
Cyprus	2015	22.08	0.822733	5.42484	16.6552
Cyprus	2016	22.38	0.824284	5.42039	16.9596
Cyprus	2017	22.58	0.82614	5.42503	17.155
Cyprus	2018	22.9	0.828343	5.42429	17.4757
Cyprus	2019	22.95	0.830981	5.43335	17.5166
Cyprus	2020	22.74	0.83306	5.42136	17.3186
South Africa	2021	17.24	0.679627	5.42021	11.8198
Czechia	1990	30.13	0.681848	5.42016	24.7098
Czechia	1991	31.62	0.688003	5.42181	26.1982
Czechia	1992	32.37	0.697578	5.42235	26.9477
Czechia	1993	33.68	0.710853	5.42112	28.2589
Czechia	1994	34.16	0.72597	5.42009	28.7399
Czechia	1995	34.74	0.737982	5.42029	29.3197
Czechia	1996	35.27	0.746041	5.42955	29.8404
Czechia	1997	35.52	0.75168	5.42097	30.099
Czechia	1998	36.34	0.757034	5.43379	30.9062
Czechia	1999	36.67	0.762429	5.42036	31.2496
Czechia	2000	36.99	0.767766	5.42301	31.567
Czechia	2001	37.48	0.772167	5.42025	32.0597
Czechia	2002	37.67	0.776928	5.42501	32.245
Czechia	2003	37.53	0.782448	5.42047	32.1095
Czechia	2004	38	0.787126	5.42031	32.5797
Czechia	2005	38.42	0.791334	5.43446	32.9855
Czechia	2006	39.06	0.794923	5.42035	33.6397
Czechia	2007	39.21	0.798254	5.42843	33.7816
Czechia	2008	39.44	0.801765	5.42021	34.0198
Czechia	2009	39.75	0.804962	5.42889	34.3211
Czechia	2010	39.97	0.808747	5.42115	34.5489
Czechia	2011	40.34	0.812055	5.42549	34.9145
Czechia	2012	40.9	0.81423	5.42052	35.4795
Czechia	2013	41.43	0.815615	5.42406	36.0059
Czechia	2014	42.07	0.816227	5.42006	36.6499
Czechia	2015	42.25	0.816565	5.42009	36.8299
Czechia	2016	42.53	0.817153	5.42	37.11
Czechia	2017	42.56	0.819068	5.42061	37.1394
Czechia	2018	42.53	0.822034	5.42023	37.1098
Czechia	2019	42.83	0.824784	5.42032	37.4097
Czechia	2020	41.27	0.826627	5.42517	35.8448
Ethiopia	2021	18.39	0.358823	6.05313	12.3369
Côte d'Ivoire	1990	12.85	0.27932	6.05014	6.79986
Côte d'Ivoire	1991	12.42	0.286493	6.05174	6.36826
Côte d'Ivoire	1992	11.86	0.293451	6.05344	5.80656
Côte d'Ivoire	1993	11.32	0.299743	6.05	5.27
Côte d'Ivoire	1994	10.83	0.305211	6.05234	4.77766
Côte d'Ivoire	1995	10.43	0.310106	6.08023	4.34977
Côte d'Ivoire	1996	10.28	0.314965	6.05084	4.22916
Côte d'Ivoire	1997	10.26	0.319844	6.05	4.21
Côte d'Ivoire	1998	10.27	0.324713	6.05001	4.21999
Côte d'Ivoire	1999	10.32	0.329201	6.05076	4.26924
Côte d'Ivoire	2000	10.4	0.333015	6.05004	4.34996
Côte d'Ivoire	2001	10.54	0.336546	6.05033	4.48967
Côte d'Ivoire	2002	10.64	0.339978	6.05002	4.58998
Côte d'Ivoire	2003	10.8	0.343349	6.05017	4.74983
Côte d'Ivoire	2004	11.04	0.346375	6.05585	4.98415
Côte d'Ivoire	2005	11.59	0.348728	6.06347	5.52653
Côte d'Ivoire	2006	12.17	0.350716	6.05815	6.11185
Côte d'Ivoire	2007	12.62	0.352727	6.05	6.57
Côte d'Ivoire	2008	13.07	0.355088	6.0504	7.0196
Côte d'Ivoire	2009	13.42	0.357939	6.05019	7.36981
Côte d'Ivoire	2010	13.53	0.361205	6.06604	7.46396
Côte d'Ivoire	2011	13.54	0.364084	6.06157	7.47843
Côte d'Ivoire	2012	13.96	0.367832	6.05018	7.90982
Côte d'Ivoire	2013	14.31	0.372354	6.05681	8.25319
Côte d'Ivoire	2014	14.8	0.377575	6.05369	8.74631
Côte d'Ivoire	2015	15.37	0.383491	6.05064	9.31936
Côte d'Ivoire	2016	15.85	0.389825	6.05502	9.79498
Côte d'Ivoire	2017	16.26	0.396694	6.05031	10.2097
Côte d'Ivoire	2018	16.65	0.404092	6.05005	10.6
Côte d'Ivoire	2019	17.05	0.411726	6.05076	10.9992
Côte d'Ivoire	2020	15.71	0.41904	6.05001	9.65999
Nigeria	2021	17.81	0.503391	5.42152	12.3885
Democratic People's Republic of Korea	1990	28.45	0.49778	5.63939	22.8106
Democratic People's Republic of Korea	1991	28.44	0.499121	5.42778	23.0122
Democratic People's Republic of Korea	1992	28.44	0.49963	5.42106	23.0189
Democratic People's Republic of Korea	1993	28.35	0.499701	5.42005	22.9299
Democratic People's Republic of Korea	1994	28.36	0.499531	5.42004	22.94
Democratic People's Republic of Korea	1995	22.62	0.499081	5.42092	17.1991
Democratic People's Republic of Korea	1996	23.87	0.498429	5.43009	18.4399
Democratic People's Republic of Korea	1997	23.84	0.497137	5.51632	18.3237
Democratic People's Republic of Korea	1998	23.8	0.496159	5.58758	18.2124
Democratic People's Republic of Korea	1999	23.78	0.496485	5.62684	18.1532
Democratic People's Republic of Korea	2000	23.77	0.497462	5.52474	18.2453
Democratic People's Republic of Korea	2001	23.8	0.499674	5.42672	18.3733
Democratic People's Republic of Korea	2002	23.86	0.502634	5.43336	18.4266
Democratic People's Republic of Korea	2003	28.64	0.506165	5.42533	23.2147
Democratic People's Republic of Korea	2004	28.74	0.510229	5.42064	23.3194
Democratic People's Republic of Korea	2005	28.89	0.515098	5.4214	23.4686
Democratic People's Republic of Korea	2006	28.98	0.519741	5.43128	23.5487
Democratic People's Republic of Korea	2007	29	0.524067	5.42001	23.58
Democratic People's Republic of Korea	2008	29.03	0.528813	5.4222	23.6078
Democratic People's Republic of Korea	2009	29.02	0.533114	5.43001	23.59
Democratic People's Republic of Korea	2010	29.09	0.537193	5.42594	23.6641
Democratic People's Republic of Korea	2011	29.28	0.541212	5.43066	23.8493
Democratic People's Republic of Korea	2012	29.49	0.545332	5.4225	24.0675
Democratic People's Republic of Korea	2013	29.75	0.549483	5.42276	24.3272
Democratic People's Republic of Korea	2014	30.05	0.553604	5.42224	24.6278
Democratic People's Republic of Korea	2015	30.34	0.557321	5.42115	24.9188
Democratic People's Republic of Korea	2016	30.67	0.560744	5.42136	25.2486
Democratic People's Republic of Korea	2017	31.02	0.563388	5.42236	25.5976
Democratic People's Republic of Korea	2018	31.33	0.565161	5.42003	25.91
Democratic People's Republic of Korea	2019	31.6	0.566766	5.4209	26.1791
Democratic People's Republic of Korea	2020	31.74	0.568189	5.42271	26.3173
Japan	2021	18.26	0.871242	5.43012	12.8299
Democratic Republic of the Congo	1990	12.2	0.289843	6.05257	6.14743
Democratic Republic of the Congo	1991	12.16	0.290432	6.05077	6.10923
Democratic Republic of the Congo	1992	12.17	0.290959	6.0534	6.1166
Democratic Republic of the Congo	1993	12.05	0.289629	6.05056	5.99944
Democratic Republic of the Congo	1994	11.97	0.286859	6.05009	5.91991
Democratic Republic of the Congo	1995	11.82	0.283968	6.05172	5.76828
Democratic Republic of the Congo	1996	10.83	0.280413	6.0613	4.7687
Democratic Republic of the Congo	1997	11.41	0.276337	6.05094	5.35906
Democratic Republic of the Congo	1998	11.54	0.271814	6.06134	5.47866
Democratic Republic of the Congo	1999	11.64	0.267368	6.05251	5.58749
Democratic Republic of the Congo	2000	11.85	0.262457	6.05083	5.79917
Democratic Republic of the Congo	2001	12.03	0.257858	6.05338	5.97662
Democratic Republic of the Congo	2002	12.12	0.254136	6.05148	6.06852
Democratic Republic of the Congo	2003	12.3	0.252334	6.0505	6.2495
Democratic Republic of the Congo	2004	12.68	0.252471	6.05944	6.62056
Democratic Republic of the Congo	2005	12.99	0.254161	6.05766	6.93234
Democratic Republic of the Congo	2006	13.27	0.257355	6.05	7.22
Democratic Republic of the Congo	2007	13.49	0.262272	6.05139	7.43861
Democratic Republic of the Congo	2008	13.56	0.268104	6.06171	7.49829
Democratic Republic of the Congo	2009	13.74	0.274361	6.05505	7.68495
Democratic Republic of the Congo	2010	14.01	0.282224	6.05107	7.95893
Democratic Republic of the Congo	2011	14.22	0.290873	6.05058	8.16942
Democratic Republic of the Congo	2012	14.44	0.300455	6.06002	8.37998
Democratic Republic of the Congo	2013	14.75	0.310831	6.05083	8.69917
Democratic Republic of the Congo	2014	15.08	0.321623	6.05574	9.02426
Democratic Republic of the Congo	2015	15.39	0.332421	6.05043	9.33957
Democratic Republic of the Congo	2016	15.67	0.341989	6.05029	9.61971
Democratic Republic of the Congo	2017	15.93	0.351102	6.05418	9.87582
Democratic Republic of the Congo	2018	16.29	0.360288	6.07109	10.2189
Democratic Republic of the Congo	2019	16.5	0.369341	6.08063	10.4194
Democratic Republic of the Congo	2020	15.09	0.376712	6.05083	9.03917
Egypt	2021	18.46	0.606787	5.43338	13.0266
Denmark	1990	18.54	0.801155	5.42196	13.118
Denmark	1991	18.62	0.80454	5.4238	13.1962
Denmark	1992	18.62	0.808164	5.42504	13.195
Denmark	1993	18.58	0.811586	5.42625	13.1537
Denmark	1994	18.5	0.815139	5.42002	13.08
Denmark	1995	18.57	0.819105	5.42428	13.1457
Denmark	1996	18.6	0.823375	5.42131	13.1787
Denmark	1997	18.56	0.82768	5.42007	13.1399
Denmark	1998	18.41	0.831683	5.42181	12.9882
Denmark	1999	18.19	0.835382	5.4225	12.7675
Denmark	2000	18.36	0.839184	5.42547	12.9345
Denmark	2001	18.54	0.843178	5.43003	13.11
Denmark	2002	18.77	0.847086	5.43333	13.3367
Denmark	2003	19.11	0.850441	5.42175	13.6882
Denmark	2004	19.52	0.853304	5.42623	14.0938
Denmark	2005	19.98	0.855691	5.42296	14.557
Denmark	2006	20.41	0.858033	5.42775	14.9822
Denmark	2007	21.04	0.859782	5.4206	15.6194
Denmark	2008	21.76	0.861782	5.43693	16.3231
Denmark	2009	22.35	0.863948	5.42559	16.9244
Denmark	2010	22.74	0.866767	5.42042	17.3196
Denmark	2011	22.99	0.869779	5.43	17.56
Denmark	2012	23.11	0.872518	5.43017	17.6798
Denmark	2013	23.16	0.874933	5.42005	17.74
Denmark	2014	23.22	0.876815	5.43318	17.7868
Denmark	2015	23.33	0.878544	5.42116	17.9088
Denmark	2016	23.57	0.88059	5.42003	18.15
Denmark	2017	24.05	0.883688	5.42071	18.6293
Denmark	2018	24.41	0.88753	5.42803	18.982
Denmark	2019	24.63	0.891625	5.42058	19.2094
Denmark	2020	24.05	0.894368	5.42034	18.6297
Kenya	2021	19.06	0.523768	5.42	13.64
Djibouti	1990	16.81	0.337782	6.05019	10.7598
Djibouti	1991	16.74	0.33877	6.05001	10.69
Djibouti	1992	16.55	0.340986	6.05023	10.4998
Djibouti	1993	16.56	0.344904	6.05122	10.5088
Djibouti	1994	16.31	0.347981	6.05042	10.2596
Djibouti	1995	16.5	0.351246	6.05041	10.4496
Djibouti	1996	16.47	0.354386	6.05337	10.4166
Djibouti	1997	16.32	0.358096	6.05021	10.2698
Djibouti	1998	16.19	0.361597	6.07011	10.1199
Djibouti	1999	16.21	0.365305	6.05043	10.1596
Djibouti	2000	16.2	0.369015	6.05404	10.146
Djibouti	2001	16.17	0.372853	6.05563	10.1144
Djibouti	2002	16.13	0.37665	6.05016	10.0798
Djibouti	2003	16.2	0.380687	6.05008	10.1499
Djibouti	2004	16.23	0.384988	6.05267	10.1773
Djibouti	2005	16.39	0.389569	6.05022	10.3398
Djibouti	2006	16.25	0.395037	6.0773	10.1727
Djibouti	2007	16.85	0.400619	6.05	10.8
Djibouti	2008	17.08	0.406658	6.05192	11.0281
Djibouti	2009	17.25	0.411969	6.06033	11.1897
Djibouti	2010	17.41	0.416999	6.05125	11.3587
Djibouti	2011	17.63	0.422316	6.05134	11.5787
Djibouti	2012	17.93	0.427711	6.00806	11.9219
Djibouti	2013	18.21	0.43336	5.69626	12.5137
Djibouti	2014	18.48	0.439456	5.71073	12.7693
Djibouti	2015	18.69	0.445855	5.93799	12.752
Djibouti	2016	19.04	0.453443	5.68779	13.3522
Djibouti	2017	19.26	0.46044	5.72155	13.5384
Djibouti	2018	19.49	0.467706	5.56448	13.9255
Djibouti	2019	19.71	0.475263	5.58907	14.1209
Djibouti	2020	17.46	0.48188	5.58107	11.8789
Comoros	2021	19.49	0.475979	5.61177	13.8782
Dominica	1990	27.62	0.563603	5.43503	22.185
Dominica	1991	27.64	0.565238	5.42224	22.2178
Dominica	1992	27.65	0.569571	5.42088	22.2291
Dominica	1993	27.71	0.578812	5.43468	22.2753
Dominica	1994	27.83	0.590119	5.43796	22.392
Dominica	1995	27.93	0.601987	5.42709	22.5029
Dominica	1996	28.06	0.614382	5.42	22.64
Dominica	1997	28.39	0.625057	5.42232	22.9677
Dominica	1998	28.1	0.633018	5.426	22.674
Dominica	1999	28.9	0.639454	5.42003	23.48
Dominica	2000	29.16	0.645831	5.42126	23.7387
Dominica	2001	29.48	0.652369	5.43199	24.048
Dominica	2002	29.7	0.658424	5.42	24.28
Dominica	2003	30	0.663679	5.43126	24.5687
Dominica	2004	30.29	0.668952	5.43005	24.8599
Dominica	2005	30.63	0.674549	5.4234	25.2066
Dominica	2006	30.7	0.680342	5.42129	25.2787
Dominica	2007	30.78	0.685416	5.43011	25.3499
Dominica	2008	30.97	0.690198	5.42277	25.5472
Dominica	2009	31.07	0.694462	5.43736	25.6326
Dominica	2010	30.89	0.698489	5.42348	25.4665
Dominica	2011	30.82	0.702463	5.42	25.4
Dominica	2012	30.75	0.706871	5.42198	25.328
Dominica	2013	30.71	0.71221	5.42002	25.29
Dominica	2014	30.7	0.718456	5.42032	25.2797
Dominica	2015	30.19	0.724786	5.43094	24.7591
Dominica	2016	30.68	0.731761	5.42003	25.26
Dominica	2017	29.97	0.736062	5.42003	24.55
Dominica	2018	30.99	0.738936	5.42001	25.57
Dominica	2019	31.02	0.742132	5.42289	25.5971
Dominica	2020	31.01	0.74442	5.43529	25.5747
Sudan	2021	19.52	0.54195	5.42002	14.1
Dominican Republic	1990	29.29	0.442654	5.59113	23.6989
Dominican Republic	1991	29.59	0.446145	5.59534	23.9947
Dominican Republic	1992	29.85	0.449953	5.85906	23.9909
Dominican Republic	1993	29.96	0.454229	5.61557	24.3444
Dominican Republic	1994	29.88	0.458621	5.58101	24.299
Dominican Republic	1995	29.71	0.463314	5.59415	24.1158
Dominican Republic	1996	29.39	0.468517	5.58089	23.8091
Dominican Republic	1997	29.25	0.474504	5.69893	23.5511
Dominican Republic	1998	28.99	0.481171	5.61178	23.3782
Dominican Republic	1999	29.02	0.488179	5.58631	23.4337
Dominican Republic	2000	29.38	0.495469	5.45293	23.9271
Dominican Republic	2001	29.74	0.502775	5.42336	24.3166
Dominican Republic	2002	29.9	0.510298	5.43082	24.4692
Dominican Republic	2003	29.77	0.517396	5.42005	24.3499
Dominican Republic	2004	29.44	0.524543	5.4217	24.0183
Dominican Republic	2005	29.56	0.532229	5.42345	24.1366
Dominican Republic	2006	29.68	0.540223	5.42105	24.259
Dominican Republic	2007	29.96	0.548187	5.42	24.54
Dominican Republic	2008	30.41	0.555371	5.42714	24.9829
Dominican Republic	2009	30.74	0.561784	5.42046	25.3195
Dominican Republic	2010	31	0.568131	5.43564	25.5644
Dominican Republic	2011	31.13	0.573835	5.43056	25.6994
Dominican Republic	2012	30.61	0.578966	5.42007	25.1899
Dominican Republic	2013	29.96	0.583626	5.42424	24.5358
Dominican Republic	2014	29.71	0.588237	5.43208	24.2779
Dominican Republic	2015	29.77	0.592924	5.42167	24.3483
Dominican Republic	2016	29.91	0.59762	5.42004	24.49
Dominican Republic	2017	30.09	0.60214	5.42114	24.6689
Dominican Republic	2018	30.36	0.606961	5.42	24.94
Dominican Republic	2019	30.84	0.611913	5.42503	25.415
Dominican Republic	2020	29.41	0.615636	5.42168	23.9883
Greenland	2021	19.79	0.82621	5.4276	14.3624
Ecuador	1990	29.68	0.518431	5.42178	24.2582
Ecuador	1991	28.88	0.517679	5.42084	23.4592
Ecuador	1992	29.44	0.518379	5.42	24.02
Ecuador	1993	29.86	0.520707	5.42001	24.44
Ecuador	1994	30.22	0.524908	5.4337	24.7863
Ecuador	1995	30.62	0.529381	5.43053	25.1895
Ecuador	1996	30.51	0.532691	5.49335	25.0167
Ecuador	1997	31.19	0.53535	5.42045	25.7695
Ecuador	1998	31.14	0.537196	5.42038	25.7196
Ecuador	1999	31.23	0.539032	5.42043	25.8096
Ecuador	2000	31.24	0.543045	5.43414	25.8059
Ecuador	2001	31.01	0.548552	5.42008	25.5899
Ecuador	2002	30.81	0.554897	5.42075	25.3893
Ecuador	2003	30.94	0.560955	5.43345	25.5066
Ecuador	2004	30.88	0.56629	5.43066	25.4493
Ecuador	2005	30.61	0.569927	5.43529	25.1747
Ecuador	2006	30.85	0.572516	5.42281	25.4272
Ecuador	2007	31.16	0.574705	5.42015	25.7398
Ecuador	2008	31.47	0.578125	5.43131	26.0387
Ecuador	2009	32.06	0.582484	5.42335	26.6366
Ecuador	2010	32.43	0.588763	5.4209	27.0091
Ecuador	2011	32.93	0.596729	5.43549	27.4945
Ecuador	2012	33.47	0.605454	5.42084	28.0492
Ecuador	2013	34.02	0.61408	5.42555	28.5945
Ecuador	2014	34.38	0.622027	5.42086	28.9591
Ecuador	2015	34.59	0.628547	5.42569	29.1643
Ecuador	2016	34.43	0.634281	5.43032	28.9997
Ecuador	2017	34.08	0.640011	5.42267	28.6573
Ecuador	2018	33.51	0.645889	5.42338	28.0866
Ecuador	2019	33.41	0.651788	5.42252	27.9875
Ecuador	2020	28.19	0.656714	5.42011	22.7699
Haiti	2021	19.98	0.448278	5.59803	14.382
Egypt	1990	16.86	0.417183	6.06619	10.7938
Egypt	1991	17.18	0.426909	5.74606	11.4339
Egypt	1992	17.62	0.437745	5.93746	11.6825
Egypt	1993	17.65	0.44849	5.596	12.054
Egypt	1994	17.66	0.458727	5.81624	11.8438
Egypt	1995	17.96	0.468035	5.62536	12.3346
Egypt	1996	18.24	0.476117	5.85668	12.3833
Egypt	1997	18.29	0.482971	5.8336	12.4564
Egypt	1998	18.51	0.489184	5.57835	12.9316
Egypt	1999	18.56	0.495503	5.44042	13.1196
Egypt	2000	18.83	0.50217	5.42001	13.41
Egypt	2001	18.58	0.508717	5.43164	13.1484
Egypt	2002	18.5	0.515038	5.43501	13.065
Egypt	2003	18.49	0.520623	5.4225	13.0675
Egypt	2004	18.72	0.525182	5.43032	13.2897
Egypt	2005	18.97	0.528665	5.43146	13.5385
Egypt	2006	18.93	0.530396	5.42549	13.5045
Egypt	2007	19.14	0.529458	5.43024	13.7098
Egypt	2008	19.16	0.524744	5.42004	13.74
Egypt	2009	19.08	0.516256	5.42505	13.6549
Egypt	2010	19.19	0.507715	5.42542	13.7646
Egypt	2011	19.12	0.504594	5.42396	13.696
Egypt	2012	19.18	0.509157	5.44053	13.7395
Egypt	2013	19.34	0.519334	5.42028	13.9197
Egypt	2014	19.56	0.53175	5.43	14.13
Egypt	2015	19.54	0.54437	5.43522	14.1048
Egypt	2016	20.06	0.556012	5.43337	14.6266
Egypt	2017	20.58	0.566915	5.43285	15.1471
Egypt	2018	20.77	0.577443	5.42032	15.3497
Egypt	2019	20.99	0.587737	5.42212	15.5679
Egypt	2020	19.28	0.597363	5.42	13.86
Brazil	2021	19.83	0.653044	5.4267	14.4033
El Salvador	1990	32.82	0.373058	6.05178	26.7682
El Salvador	1991	32.61	0.374855	6.05003	26.56
El Salvador	1992	33.01	0.377077	6.055	26.955
El Salvador	1993	32.47	0.380307	6.07925	26.3907
El Salvador	1994	32.36	0.385149	6.05364	26.3064
El Salvador	1995	32.86	0.39178	6.07024	26.7898
El Salvador	1996	34.16	0.400178	6.05013	28.1099
El Salvador	1997	34.09	0.410456	6.05041	28.0396
El Salvador	1998	33.26	0.421421	6.05396	27.206
El Salvador	1999	35.29	0.432733	5.606	29.684
El Salvador	2000	35.33	0.443963	5.71698	29.613
El Salvador	2001	36.02	0.454178	5.86662	30.1534
El Salvador	2002	37.21	0.462969	5.68179	31.5282
El Salvador	2003	36.52	0.470397	5.5833	30.9367
El Salvador	2004	35.98	0.476537	5.60889	30.3711
El Salvador	2005	35.91	0.482042	5.93524	29.9748
El Salvador	2006	35.74	0.486826	5.62783	30.1122
El Salvador	2007	36.4	0.49081	5.65196	30.748
El Salvador	2008	37.22	0.495078	5.44003	31.78
El Salvador	2009	36.66	0.49949	5.43031	31.2297
El Salvador	2010	38.17	0.504171	5.42602	32.744
El Salvador	2011	38.12	0.508969	5.42539	32.6946
El Salvador	2012	36.89	0.513397	5.42004	31.47
El Salvador	2013	36.89	0.518122	5.42602	31.464
El Salvador	2014	35.51	0.523469	5.43009	30.0799
El Salvador	2015	33.2	0.529387	5.42	27.78
El Salvador	2016	36.52	0.53565	5.42053	31.0995
El Salvador	2017	36.9	0.541999	5.42025	31.4797
El Salvador	2018	37.05	0.548143	5.43359	31.6164
El Salvador	2019	37.49	0.554032	5.42705	32.063
El Salvador	2020	35.75	0.55892	5.43615	30.3139
Iraq	2021	19.85	0.662626	5.42074	14.4293
Equatorial Guinea	1990	9.3	0.268784	6.05021	3.24979
Equatorial Guinea	1991	9.47	0.275297	6.0503	3.4197
Equatorial Guinea	1992	9.69	0.283488	6.055	3.635
Equatorial Guinea	1993	9.9	0.292236	6.06361	3.83639
Equatorial Guinea	1994	10.02	0.300686	6.06017	3.95983
Equatorial Guinea	1995	10.08	0.310444	6.05413	4.02587
Equatorial Guinea	1996	10.38	0.324601	6.05056	4.32944
Equatorial Guinea	1997	11.37	0.350551	6.05266	5.31734
Equatorial Guinea	1998	12.04	0.371237	6.05681	5.98319
Equatorial Guinea	1999	12.74	0.391128	6.05167	6.68833
Equatorial Guinea	2000	13.43	0.411383	6.05167	7.37833
Equatorial Guinea	2001	14.3	0.43359	5.69346	8.60654
Equatorial Guinea	2002	15.04	0.451939	5.64038	9.39962
Equatorial Guinea	2003	15.39	0.467847	5.70269	9.68731
Equatorial Guinea	2004	15.78	0.48388	5.602	10.178
Equatorial Guinea	2005	16.01	0.498684	5.42258	10.5874
Equatorial Guinea	2006	16.69	0.51158	5.42019	11.2698
Equatorial Guinea	2007	17.04	0.524076	5.43139	11.6086
Equatorial Guinea	2008	17.25	0.537019	5.43007	11.8199
Equatorial Guinea	2009	17.79	0.548515	5.42505	12.3649
Equatorial Guinea	2010	18.24	0.559109	5.42097	12.819
Equatorial Guinea	2011	18.04	0.570277	5.43337	12.6066
Equatorial Guinea	2012	17.88	0.581834	5.42136	12.4586
Equatorial Guinea	2013	18.1	0.592801	5.42304	12.677
Equatorial Guinea	2014	18.22	0.603473	5.43511	12.7849
Equatorial Guinea	2015	17.84	0.613135	5.43578	12.4042
Equatorial Guinea	2016	17.36	0.621858	5.42516	11.9348
Equatorial Guinea	2017	17.31	0.630235	5.421	11.889
Equatorial Guinea	2018	17.27	0.638023	5.42005	11.85
Equatorial Guinea	2019	17.1	0.645303	5.42725	11.6727
Equatorial Guinea	2020	14.54	0.652125	5.42005	9.11995
Monaco	2021	19.87	0.908263	5.42	14.45
Eritrea	1990	7.15	0.216028	7.15	0
Eritrea	1991	7.13	0.222575	7.13	0
Eritrea	1992	9.6	0.230296	6.5818	3.0182
Eritrea	1993	9.69	0.239385	6.05001	3.63999
Eritrea	1994	9.74	0.250753	6.0511	3.6889
Eritrea	1995	9.44	0.261498	6.07038	3.36962
Eritrea	1996	9.7	0.272527	6.05544	3.64456
Eritrea	1997	10.04	0.283552	6.05446	3.98554
Eritrea	1998	10.13	0.293765	6.0791	4.0509
Eritrea	1999	8.21	0.303142	6.08095	2.12905
Eritrea	2000	10.44	0.310248	6.06129	4.37871
Eritrea	2001	11.14	0.317248	6.05069	5.08931
Eritrea	2002	11.43	0.323567	6.05087	5.37913
Eritrea	2003	11.65	0.328594	6.05011	5.59989
Eritrea	2004	11.9	0.332879	6.06001	5.83999
Eritrea	2005	12.14	0.336683	6.06534	6.07466
Eritrea	2006	12.51	0.339836	6.05023	6.45977
Eritrea	2007	12.79	0.342843	6.05055	6.73945
Eritrea	2008	12.91	0.343428	6.06188	6.84812
Eritrea	2009	13.17	0.345148	6.05002	7.11998
Eritrea	2010	13.41	0.348146	6.05349	7.35651
Eritrea	2011	13.74	0.354163	6.05007	7.68993
Eritrea	2012	14.09	0.360113	6.05843	8.03157
Eritrea	2013	14.37	0.364344	6.05049	8.31951
Eritrea	2014	14.76	0.372528	6.05451	8.70549
Eritrea	2015	15.01	0.376935	6.05086	8.95914
Eritrea	2016	15.29	0.382172	6.05	9.24
Eritrea	2017	15.54	0.385936	6.05084	9.48916
Eritrea	2018	15.79	0.391155	6.05762	9.73238
Eritrea	2019	16.05	0.396331	6.05095	9.99905
Eritrea	2020	15.93	0.400459	6.05118	9.87882
Nauru	2021	19.91	0.625178	5.42008	14.4899
Estonia	1990	36.02	0.674968	5.42157	30.5984
Estonia	1991	35.05	0.685223	5.42131	29.6287
Estonia	1992	34.63	0.695587	5.42	29.21
Estonia	1993	32.44	0.703693	5.43581	27.0042
Estonia	1994	29.72	0.708456	5.4314	24.2886
Estonia	1995	31	0.713173	5.42204	25.578
Estonia	1996	34.57	0.718813	5.42038	29.1496
Estonia	1997	34.87	0.724652	5.4257	29.4443
Estonia	1998	34.22	0.729027	5.42881	28.7912
Estonia	1999	35.85	0.733251	5.42025	30.4298
Estonia	2000	36.54	0.739713	5.43345	31.1066
Estonia	2001	35.59	0.746602	5.42012	30.1699
Estonia	2002	36.37	0.75263	5.42034	30.9497
Estonia	2003	37.5	0.757816	5.42104	32.079
Estonia	2004	37.7	0.763224	5.42068	32.2793
Estonia	2005	38.64	0.769112	5.42308	33.2169
Estonia	2006	38.88	0.774452	5.42044	33.4596
Estonia	2007	38.78	0.781074	5.42438	33.3556
Estonia	2008	41.09	0.788599	5.42524	35.6648
Estonia	2009	42.37	0.794728	5.42173	36.9483
Estonia	2010	44.19	0.80083	5.42722	38.7628
Estonia	2011	44.19	0.806633	5.42146	38.7685
Estonia	2012	44.45	0.811109	5.42168	39.0283
Estonia	2013	46.02	0.814887	5.42502	40.595
Estonia	2014	45.64	0.818771	5.42519	40.2148
Estonia	2015	46.62	0.823221	5.4337	41.1863
Estonia	2016	46.73	0.827364	5.42011	41.3099
Estonia	2017	47.51	0.830975	5.42063	42.0894
Estonia	2018	47.26	0.834566	5.42335	41.8366
Estonia	2019	48.3	0.838574	5.42036	42.8796
Estonia	2020	47.22	0.841817	5.42294	41.7971
Nepal	2021	20.31	0.433175	5.60159	14.7084
Eswatini	1990	16.5	0.399421	6.05018	10.4498
Eswatini	1991	16.66	0.40827	6.05334	10.6067
Eswatini	1992	16.8	0.416683	6.05361	10.7464
Eswatini	1993	16.77	0.424803	5.932	10.838
Eswatini	1994	16.15	0.432503	5.63984	10.5102
Eswatini	1995	15.13	0.440127	5.63014	9.49986
Eswatini	1996	13.62	0.447399	5.60894	8.01106
Eswatini	1997	12.45	0.45409	5.9045	6.5455
Eswatini	1998	10.97	0.460137	5.60342	5.36658
Eswatini	1999	9.67	0.465991	5.61225	4.05775
Eswatini	2000	8.32	0.471853	5.61848	2.70152
Eswatini	2001	7.18	0.477233	5.75408	1.42592
Eswatini	2002	6.47	0.482474	6.01145	0.458547
Eswatini	2003	5.85	0.487609	5.58343	0.266565
Eswatini	2004	5.44	0.492669	5.44	0
Eswatini	2005	5.42	0.498044	5.42	0
Eswatini	2006	5.71	0.503658	5.42097	0.289029
Eswatini	2007	5.88	0.50926	5.4225	0.457499
Eswatini	2008	5.96	0.514731	5.42005	0.539948
Eswatini	2009	6.16	0.520427	5.42077	0.739235
Eswatini	2010	6.68	0.526246	5.42002	1.25998
Eswatini	2011	7.39	0.531914	5.4353	1.9547
Eswatini	2012	7.9	0.537798	5.4252	2.4748
Eswatini	2013	8.47	0.543836	5.42199	3.04801
Eswatini	2014	9.3	0.549614	5.42001	3.87999
Eswatini	2015	10.08	0.555374	5.42034	4.65966
Eswatini	2016	10.68	0.561061	5.4217	5.2583
Eswatini	2017	11.26	0.566698	5.42174	5.83826
Eswatini	2018	11.89	0.572155	5.42084	6.46916
Eswatini	2019	12.66	0.577206	5.42659	7.23341
Eswatini	2020	10.99	0.581653	5.42208	5.56792
Sao Tome and Principe	2021	20.36	0.505414	5.43092	14.9291
Ethiopia	1990	9.24	0.148034	9.15445	0.0855482
Ethiopia	1991	10.13	0.1496	8.99977	1.13023
Ethiopia	1992	10.54	0.150174	8.9889	1.5511
Ethiopia	1993	10.82	0.151582	8.71721	2.10279
Ethiopia	1994	11.07	0.152983	8.88838	2.18162
Ethiopia	1995	11.29	0.155086	8.90969	2.38031
Ethiopia	1996	11.74	0.158127	9.12727	2.61273
Ethiopia	1997	12.14	0.161875	9.07117	3.06883
Ethiopia	1998	12.54	0.165078	8.90988	3.63012
Ethiopia	1999	12.44	0.168904	8.90122	3.53878
Ethiopia	2000	12.63	0.173419	9.11555	3.51445
Ethiopia	2001	14.02	0.178973	9.18375	4.83625
Ethiopia	2002	14.54	0.184138	8.93492	5.60508
Ethiopia	2003	15.01	0.188695	9.17479	5.83521
Ethiopia	2004	15.54	0.195031	8.85976	6.68024
Ethiopia	2005	16.19	0.202868	8.63215	7.55785
Ethiopia	2006	16.86	0.211524	8.66379	8.19621
Ethiopia	2007	17.62	0.22182	7.155	10.465
Ethiopia	2008	18.3	0.232872	6.33172	11.9683
Ethiopia	2009	18.94	0.244266	6.05542	12.8846
Ethiopia	2010	19.55	0.256081	6.05091	13.4991
Ethiopia	2011	20.13	0.267881	6.05047	14.0795
Ethiopia	2012	20.63	0.279007	6.05339	14.5766
Ethiopia	2013	21.09	0.289885	6.05028	15.0397
Ethiopia	2014	21.48	0.300485	6.06	15.42
Ethiopia	2015	21.78	0.310736	6.06002	15.72
Ethiopia	2016	22.05	0.320432	6.05042	15.9996
Ethiopia	2017	22.36	0.329469	6.05029	16.3097
Ethiopia	2018	22.64	0.33805	6.06016	16.5798
Ethiopia	2019	22.89	0.346423	6.06067	16.8293
Ethiopia	2020	20.49	0.353216	6.05001	14.44
Guyana	2021	20.44	0.650812	5.42036	15.0196
Fiji	1990	25.65	0.534649	5.42049	20.2295
Fiji	1991	25.67	0.538778	5.44746	20.2225
Fiji	1992	25.73	0.543189	5.42882	20.3012
Fiji	1993	25.54	0.547776	5.42013	20.1199
Fiji	1994	25.43	0.552849	5.43425	19.9957
Fiji	1995	25.37	0.558531	5.42042	19.9496
Fiji	1996	25.3	0.565042	5.42056	19.8794
Fiji	1997	25.44	0.571188	5.42035	20.0197
Fiji	1998	26.45	0.577172	5.42571	21.0243
Fiji	1999	25.57	0.583574	5.42178	20.1482
Fiji	2000	25.46	0.589197	5.42029	20.0397
Fiji	2001	26	0.594497	5.43003	20.57
Fiji	2002	27.03	0.599322	5.42115	21.6089
Fiji	2003	27.02	0.60349	5.42007	21.5999
[truncated: 4,527 more rows]

## Sheet: Supplementary Table 8
Supplementary Table 8. Global lifetime risks of developing BPH in men by ages.
age (start)	age (end)	risk
40	40	0
40	45	0.26
40	50	1.05
40	55	3.09
40	60	6.72
40	65	12.44
40	70	19.09
40	75	23.7
40	80	26.07
40	85	27
40	90	27.23
40	95	27.27
40	100	27.29
50	50	0
50	55	2.03
50	60	5.67
50	65	11.39
50	70	18.03
50	75	22.65
50	80	25.01
50	85	25.95
50	90	26.17
50	95	26.22
50	100	26.23
60	60	0
60	65	5.72
60	70	12.37
60	75	16.98
60	80	19.35
60	85	20.28
60	90	20.51
60	95	20.55
60	100	20.57
70	70	0
70	75	4.62
70	80	6.98
70	85	7.92
70	90	8.14
70	95	8.19
70	100	8.2

## Sheet: Supplementary Table 9
Supplementary Table 9. ARIMA model forecasts for global lifetime risk of BPH (2020–2050).
Year	risk	95%CI (low)	95%CI (upper)
2020	29.62	29.3558	29.8842
2021	29.86	29.2693	30.4507
2022	30.1	29.1115	31.0885
2023	30.34	28.8931	31.7869
2024	30.58	28.6208	32.5392
2025	30.82	28.2999	33.3401
2026	31.06	27.9342	34.1858
2027	31.3	27.5268	35.0732
2028	31.54	27.0802	35.9998
2029	31.78	26.5965	36.9635
2030	32.02	26.0775	37.9625
2031	32.26	25.5248	38.9952
2032	32.5	24.9398	40.0602
2033	32.74	24.3236	41.1564
2034	32.98	23.6774	42.2826
2035	33.22	23.0022	43.4378
2036	33.46	22.2988	44.6212
2037	33.7	21.5681	45.8319
2038	33.94	20.8107	47.0693
2039	34.18	20.0275	48.3325
2040	34.42	19.219	49.621
2041	34.66	18.3859	50.9341
2042	34.9	17.5286	52.2714
2043	35.14	16.6477	53.6323
2044	35.38	15.7438	55.0162
2045	35.62	14.8171	56.4229
2046	35.86	13.8683	57.8517
2047	36.1	12.8977	59.3023
2048	36.34	11.9056	60.7744
2049	36.58	10.8924	62.2676
2050	36.82	9.85859	63.7814
